# Supplementary material
Source: publisher figshare collection journal article supplement (https://tandf.figshare.com/ndownloader/files/13243418)
Supplement: Supplementary file 1 [file 13243418]

## Sheet: CPP A
CPP A	Protein	Peptide length	Amino acid at C-terminal	Amino acid at N-terminal
LYQEPVLGPVRGPFPIIV	β-casein	18	V	L
LVYPFPGPIPNSLPQNIPPLTQTPVVVPPF	β-casein	30	F	L
LLYQEPVLGPVRGPFPIIV	β-casein	19	V	L
LYQEPVLGPVRGPFP	β-casein	15	P	L
LTDVENLHLPLP	β-casein	12	P	L
VYPFPGPIPNSLPQNIPPLTQTPVVVPPF	β-casein	29	F	V
LSQSKVLPVPQK	β-casein	12	K	L
LTDVENLHLPLPL	β-casein	13	L	L
LSQSKVLPVPQKAVPYPQRDMP	β-casein	22	P	L
AMAPKHKEMPFPKYPVEPFTESQS	β-casein	24	S	A
AVPYPQRDMP	β-casein	10	P	A
VLGPVRGPFPIIV	β-casein	13	V	V
MHQPHQPLPPTVMFPPQSVLS	β-casein	21	S	M
LLYQEPVLGPVRGPFP	β-casein	16	P	L
SLPQNIPPLTQTPVVVPPF	β-casein	19	F	S
LLQSWMHQPHQPLPPTVMFPPQSVLS	β-casein	26	S	L
AVPYPQRDMPIQA	β-casein	13	A	A
LSQSKVLPVPQKAVPYPQRDMPIQA	β-casein	25	A	L
LLQSWMHQPHQPLPPTVMFPPQS	β-casein	23	S	L
MHQPHQPLPPTVMFPPQS	β-casein	18	S	M
SQSKVLPVPQK	β-casein	11	K	S
AVPYPQRDMPIQAF	β-casein	14	F	A
FPGPIPNSLPQNIPPLTQTPVVVPPFL	β-casein	27	L	F
LSQSKVLPVPQ	β-casein	11	Q	L
VLGPVRGPFP	β-casein	10	P	V
AMAPKHKEMPFPKYPVEPFTESQSLT	β-casein	26	T	A
AMAPKHKEMPFPKYP	β-casein	15	P	A
MHQPHQPLPPT	β-casein	11	T	M
LTLTDVENLHLPLP	β-casein	14	P	L
QTPVVVPPFLQPEVMGVSKVKEAMAPKHKE	β-casein	30	E	Q
LLQSWMHQPHQPLPPT	β-casein	16	T	L
QSWMHQPHQPLPPTVMFPPQSVLSL	β-casein	25	L	Q
LTLTDVENLHLPLPL	β-casein	15	L	L
LTQTPVVVPPF	β-casein	11	F	L
PLLQSWMHQPHQPLPPTVMFPPQSVLSLS	β-casein	29	S	P
TLTDVENLHLPLP	β-casein	13	P	T
AMAPKHKEMPFPKYPVEPF	β-casein	19	F	A
SWMHQPHQPLPPTVMFPPQSVLS	β-casein	23	S	S
FQSEEQQQTEDELQDKIHP	β-casein	19	P	F
LQSWMHQPHQPLPPTVMFPPQS	β-casein	22	S	L
LQSWMHQPHQPLPPT	β-casein	15	T	L
QSKVLPVPQK	β-casein	10	K	Q
VSKVKEAMAPKHKEMPFPKYPVEPFTESQS	β-casein	30	S	V
AMAPKHKEMPFPKYPVEP	β-casein	18	P	A
TLTDVENLHLPLPL	β-casein	14	L	T
LVYPFPGPIPNSLPQNIPPLTQTPV	β-casein	25	V	L
FQSEEQQQTEDELQDKIHPF	β-casein	20	F	F
HKEMPFPKYPVEPFTESQS	β-casein	19	S	H
LQSWMHQPHQPLPPTVMFPPQSVLS	β-casein	25	S	L
LVYPFPGPIPN	β-casein	11	N	L
LGPVRGPFPIIV	β-casein	12	V	L
LYQEPVLGPVRGPFPI	β-casein	16	I	L
SLPQNIPPLTQTPVVVPPFLQPEVMG	β-casein	26	G	S
RELEELNVPGEIVESL	β-casein	16	L	R
VYPFPGPIPNSLPQNIPPLTQTPVVVPPFL	β-casein	30	L	V
LQPEVMGVSKVKE	β-casein	13	E	L
YQEPVLGPVRGPFPIIV	β-casein	17	V	Y
LTDVENLHLPLPLLQ	β-casein	15	Q	L
VYPFPGPIPN	β-casein	10	N	V
KAVPYPQRDMP	β-casein	11	P	K
TDVENLHLPLP	β-casein	11	P	T
VYPFPGPIPNSLPQNIPPLTQTPV	β-casein	24	V	V
PYPQRDMPIQA	β-casein	11	A	P
PLTQTPVVVPPFLQPEVMGVSKVKEAM	β-casein	27	M	P
PQKAVPYPQRDMP	β-casein	13	P	P
VYPFPGPIPNSLPQNIPPLTQTP	β-casein	23	P	V
IPPLTQTPVVVPPF	β-casein	14	F	I
PYPQRDMPIQAF	β-casein	12	F	P
EMPFPKYPVEPFTESQS	β-casein	17	S	E
LSQSKVLPVPQKAVPYPQRDMPI	β-casein	23	I	L
WMHQPHQPLPPTVMFPPQS	β-casein	19	S	W
AMAPKHKEMPFPKYPVEPFTE	β-casein	21	E	A
VLPVPQKAVPYPQRDMP	β-casein	17	P	V
SQSKVLPVPQKAVPYPQRDMP	β-casein	21	P	S
NIPPLTQTPVVVPPF	β-casein	15	F	N
WMHQPHQPLPPTVMFPPQSVLS	β-casein	22	S	W
LSQSKVLPVPQKAVPYPQ	β-casein	18	Q	L
AVPYPQRDMPIQAFL	β-casein	15	L	A
VEPFTESQSLT	β-casein	11	T	V
KAVPYPQRDMPIQAF	β-casein	15	F	K
LTLTDVENLHLPLPLLQ	β-casein	17	Q	L
VMFPPQSVLS	β-casein	10	S	V
KAVPYPQRDMPIQA	β-casein	14	A	K
PGEIVESLSSSEESITR	β-casein	17	R	P
LVYPFPGPIPNSLPQNIPPLTQTP	β-casein	24	P	L
RELEELNVPGE	β-casein	11	E	R
GEIVESLSSSEESITR	β-casein	16	R	G
ITRINKKIEKFQSEEQQQTEDELQDKI	β-casein	27	I	I
VLSLSQSKVLPVPQK	β-casein	15	K	V
PPLTQTPVVVPPF	β-casein	13	F	P
HKEMPFPKYPVEPFTESQSLT	β-casein	21	T	H
LTQTPVVVPPFLQPEV	β-casein	16	V	L
QEPVLGPVRGPFPIIV	β-casein	16	V	Q
QEPVLGPVRGPFP	β-casein	13	P	Q
VYPFPGPIPNSLPQNIPPL	β-casein	19	L	V
PQNIPPLTQTPVVVPPF	β-casein	17	F	P
HKEMPFPKYPVEPF	β-casein	14	F	H
SLPQNIPPLTQTPVVVPPFLQPE	β-casein	23	E	S
PPLTQTPVVVPPFLQPEVMG	β-casein	20	G	P
LVYPFPGPIPNSLPQN	β-casein	16	N	L
SLSQSKVLPVPQK	β-casein	13	K	S
PVEPFTESQSLTLTDVENLH	β-casein	20	H	P
EAMAPKHKEMPFPKYPVEP	β-casein	19	P	E
HLPLPLLQSWMHQPHQPLPPTVMFPPQSVL	β-casein	30	L	H
TQTPVVVPPFLQPEV	β-casein	15	V	T
SLPQNIPPLTQTPVVVPPFLQPEVM	β-casein	25	M	S
QSKVLPVPQKAVPYPQRDMP	β-casein	20	P	Q
PLPPTVMFPPQ	β-casein	11	Q	P
PVLGPVRGPFPIIV	β-casein	14	V	P
SQSKVLPVPQKAVPYPQRDM	β-casein	20	M	S
PNSLPQNIPPLTQTPVVVPPFLQPEV	β-casein	26	V	P
PPLTQTPVVVPPFLQPEVMGVSK	β-casein	23	K	P
PVLGPVRGPFP	β-casein	11	P	P
QAFLLYQEPVLGPVRGPFPIIV	β-casein	22	V	Q
EPVLGPVRGPFPIIV	β-casein	15	V	E
DMPIQAFLLYQEPVLGPV	β-casein	18	V	D
SLSQSKVLPVPQKAVPYPQRDMPIQ	β-casein	25	Q	S
VSKVKEAMAPKHKEMPFPK	β-casein	19	K	V
TDVENLHLPLPL	β-casein	12	L	T
QTPVVVPPFLQPEV	β-casein	14	V	Q
FPGPIPNSLPQNIPPLTQTPV	β-casein	21	V	F
FTESQSLTLTDVENLHLPLP	β-casein	20	P	F
IHPFAQTQSLVYPFPGPIPNSLPQNIPPLT	β-casein	30	T	I
DVENLHLPLPL	β-casein	11	L	D
PNSLPQNIPPLTQT	β-casein	14	T	P
LQPEVMG	β-casein	7	G	L
LVYPFPGPIPNSLPQNIPPLTQTPVVVPPFLQPEVMG	β-casein	37	G	L
TVMFPPQSVLSLSQSKVLPVPQKAVPYPQ	β-casein	29	Q	T
LSQSKVLPVPQKAVPYPQRDMPIQAF	β-casein	26	F	L
PYPQRDMP	β-casein	8	P	P
LVYPFPGPIPNSLPQNIPPLTQTPVVVPPFLQPEVMGVSKVKE	β-casein	43	E	L
MAPKHKEMPFPKYPVEPFTESQS	β-casein	23	S	M
VYPFPGPIPNSLPQNIPPLTQTPVVVPPFLQPEVMG	β-casein	36	G	V
SLVYPFPGPIPNSLPQNIPPLTQTPVVVPPF	β-casein	31	F	S
TQTPVVVPPFLQPEVMGVSK	β-casein	20	K	T
LSQSKVLPVPQKAVPYPQRDMPIQAFLLYQEPVLGPVRGPFPIIV	β-casein	45	V	L
LHLPLPL	β-casein	7	L	L
QDKIHPFAQTQSLVYPFPGPIPNSLPQNIPPLTQTPVV	β-casein	38	V	Q
AMAPKHKEMPFPKYPVEPFTESQSLTLTDVENLHLPLPL	β-casein	39	L	A
LVYPFPGPIPNSLPQNIPPLTQTPVVVPPFL	β-casein	31	L	L
LSQSKVLPVPQKAVPYPQRDMPIQAFL	β-casein	27	L	L
LTLTDVENLHLPLPLLQS	β-casein	18	S	L
VMFPPQSVLSLSQSKVLPVPQKAVPYPQRDMPIQA	β-casein	35	A	V
KEMPFPKYPVEPFTESQSLTLTDVENLHLPLPLLQSWMHQPHQPLPPTVMFPP	β-casein	53	P	K
LVYPFPGPIPNSLPQNIPPLTQTPVVVPPFLQPEVM	β-casein	36	M	L
VLSLSQSKVLPVPQKAVPYPQRDMPIQAFLLYQEPVLGPVRGPFPIIV	β-casein	48	V	V
VEPFTESQS	β-casein	9	S	V
AMAPKHKEMPFPKYPVEPFTESQSL	β-casein	25	L	A
LTDVENL	β-casein	7	L	L
LVYPFPGPIPNSLPQNIPPLTQTPVVVPPFLQPEVMGVSKVKEA	β-casein	44	A	L
PEVMGVSKVKEAMAPK	β-casein	16	K	P
IEKFQSEEQQQTEDELQDKIHP	β-casein	22	P	I
VESLSSSEESITRINKKIE	β-casein	19	E	V
VPGEIVESLSSSEESITRINKKIEK	β-casein	25	K	V
YPFPGPIPNSLPQNIPP	β-casein	17	P	Y
LQSWMHQPHQPLPPTVMFPPQSVLSL	β-casein	26	L	L
MAPKHKEMPFPKYPVEPFTESQSLT	β-casein	25	T	M
AMAPKHKEMPFPKYPVEPFTESQSLTLTDVEN	β-casein	32	N	A
IHPFAQTQSLVYPFPGPIPNSLPQNIPPLTQTPVVVPPFLQPEVMG	β-casein	46	G	I
MAPKHKEMPFPKYPVEPFTESQSLTLTDVENLHLPLP	β-casein	37	P	M
MHQPHQPLPPTVMFPPQSVLSLSQSKVLP	β-casein	29	P	M
IEKFQSEEQQQTEDELQDKIHPF	β-casein	23	F	I
SLVYPFPGPIPNSLPQNIPPLTQTPVVVPPFLQPEVMG	β-casein	38	G	S
QPEVMGVSKVKEAMAPKHKEMPFPKYPVEPFTESQSL	β-casein	37	L	Q
HQPLPPTVMFPPQSVLSLSQSKVLPVPQKAVPYPQRD	β-casein	37	D	H
QDKIHPFAQTQSLVYPFPGPIPNSLPQNIPPLTQTPVVVPPFLQPEVMGVS	β-casein	51	S	Q
MAPKHKEMPFPKYPVEPFTESQSLTLTDVENLHLPLPL	β-casein	38	L	M
PVVVPPFLQPEVMGVSKVKEAMAPKHKEMPFPKYPV	β-casein	36	V	P
SWMHQPHQPLPPTVMFPPQS	β-casein	20	S	S
KVKEAMAPKHKEMPFPKYPVEPFTESQS	β-casein	28	S	K
GPVRGPFP	β-casein	8	P	G
VKEAMAPKHKEMPF	β-casein	14	F	V
AMAPKHKEMPFPKYPVEPFTESQSLTLTDVENLHLPLPLLQ	β-casein	41	Q	A
LQPEVMGVS	β-casein	9	S	L
QPLPPTVMFPPQSVLSLSQS	β-casein	20	S	Q
KIHPFAQTQSLVYPFPGPIPNSLPQN	β-casein	26	N	K
LGPVRGPFP	β-casein	9	P	L
VSKVKEAMAPKHKEMPFPKYPVEPFTESQSLTLTDVENLHLPLPL	β-casein	45	L	V
VSKVKEAMAPKHKEMPFPKYPVEPFTESQSLT	β-casein	32	T	V
QPEVMGVSKVKEAMAPKHKEMPFPKYPVEPFTESQSLTLTDVENLHLPLPLL	β-casein	52	L	Q
PVEPFTESQSLTLTDVENLHLPL	β-casein	23	L	P
VKEAMAPKHKEMP	β-casein	13	P	V
VRGPFPIIV	β-casein	9	V	V
PVRGPFP	β-casein	7	P	P
VKEAMAPKHKEMPFPKYPVEPFTESQSLTLTDV	β-casein	33	V	V
LTLTDVEN	β-casein	8	N	L
SSSEESITRINKKIEKFQSEEQQQTEDELQDKIHPF	β-casein	36	F	S
VSKVKEA	β-casein	7	A	V
AQTQSLVYPFPGPIPNSLPQN	β-casein	21	N	A
PIPNSLPQNI	β-casein	10	I	P
PQKAVPYPQRDMPIQAFLLYQEPVLGPVRGPFPI	β-casein	34	I	P
QDKIHPFAQTQSLVYPFPGPIPNSLPQNIPPLTQ	β-casein	34	Q	Q
WMHQPHQPLPPT	β-casein	12	T	W
PHQPLPPTVMFPPQSVLSLSQSKVLPVPQKA	β-casein	31	A	P
PEVMGVSKVKEAMAPKHKEM	β-casein	20	M	P
LTQTPVVVPPFLQPEVMG	β-casein	18	G	L
LLQSWMHQPHQPLPPTVM	β-casein	18	M	L
PGPIPNSLPQNIPPLTQTPVVVPPFLQPEVMGVSKV	β-casein	36	V	P
LYQEPVLGP	β-casein	9	P	L
AVPYPQRDMPIQAFLLYQEPVLGPVRGPFPIIV	β-casein	33	V	A
GPVRGPFPI	β-casein	9	I	G
LTDVENLHLPLPLLQSWMHQPHQPLPPTVMFPPQSVLSLS	β-casein	40	S	L
LQDKIHPFAQTQSLVY	β-casein	16	Y	L
QDKIHPFAQTQSLVYPFPGPIPNSLPQNIPPLTQTPVVVPPFLQPEVMGVSK	β-casein	52	K	Q
SLTLTDVENLHLPLP	β-casein	15	P	S
SQSKVLPVPQKAVPYPQRDMPIQAF	β-casein	25	F	S
KIEKFQSEEQQQTEDELQDKIHP	β-casein	23	P	K
SKVLPVPQK	β-casein	9	K	S
VPPFLQPEVMGVSKVKEAMAPKHKEMPFPKYPVEPFTE	β-casein	38	E	V
VYPFPGPIPNSLPQNIPPLTQTPVVVPPFLQPE	β-casein	33	E	V
AVPYPQRDMPIQAFLLY	β-casein	17	Y	A
LQSWMHQPHQPLPPTVMFPPQSVLSLSQSKVLPVPQKAVPYPQRDMPIQAFL	β-casein	52	L	L
VKEAMAPKHKEMPFPKYPVEPFTESQS	β-casein	27	S	V
EAMAPKHKEMPFPKYPVE	β-casein	18	E	E
PPLTQTPVVVPPFLQPEVMGVSKVKEAM	β-casein	28	M	P
GVSKVKEAMAPKHKEMPFPKYPVEPFTESQSLTLTDV	β-casein	37	V	G
INKKIEKFQSEEQQQTEDELQDKIHPFAQTQSLVYPFPGPIPNSLPQ	β-casein	47	Q	I
FPGPIPNSLPQNIPPLTQTPVVVPPFLQPEVMGVSKVKEAMAPKHKEM	β-casein	48	M	F
DKIHPFAQTQSLVYPFPGPIPNSLPQNIPPLTQTP	β-casein	35	P	D
VLSLSQSKVLPVPQKAVPYPQRDMPIQAFL	β-casein	30	L	V
LQDKIHPFAQTQSLVYPFPGPIPNSLPQNIPPLTQTPVVVPPFLQPEVMGVSKVK	β-casein	55	K	L
MGVSKVKEAMAPKHKEMPFPKYPVEPFTESQSLTLTDVEN	β-casein	40	N	M
VYPFPGPIPNSLPQNIPPLTQTPVVVPPFLQPEVMGVSKVKEA	β-casein	43	A	V
LTLTDVENLHLPLPLLQSWMHQPHQPLPPTVMFPPQSVLSLSQSKVL	β-casein	47	L	L
SLTLTDVENL	β-casein	10	L	S
PFAQTQSLVYPFPGPIPNSLPQNIPPLTQT	β-casein	30	T	P
PTVMFPPQSVLSLSQSKVLPVPQKAVPYPQRDMPIQ	β-casein	36	Q	P
QTQSLVYPFPGPIPNSLPQNIPPLTQTPVVVPPFLQPEVMGVSKVKEAMA	β-casein	50	A	Q
KVKEAMAPKHKE	β-casein	12	E	K
MFPPQSVLSLSQSKVLPVPQKAVPY	β-casein	25	Y	M
PKYPVEPFTESQSLTLTDVENLHLPLPLLQSWMHQPHQPLPPTVMFPPQSVLSL	β-casein	54	L	P
PEVMGVSKVKEA	β-casein	12	A	P
PKYPVEPFTESQSLTLTDVENLHLPLPLLQSWMHQPHQPLP	β-casein	41	P	P
KVKEAMAPKHKEMPFPKYPVEPFTESQSLTLTDVENLHLPLPL	β-casein	43	L	K
PLLQSWMHQPHQPLPPT	β-casein	17	T	P
PNSLPQNIPPLTQTPVVVPPF	β-casein	21	F	P
LSLSQSKVLPVPQKAVPYPQRDMPIQ	β-casein	26	Q	L
TLTDVENLHLPLPLLQSWMHQPHQPLPPTVMFPPQSVLS	β-casein	39	S	T
QDKIHPFAQTQSLVY	β-casein	15	Y	Q
LPLLQSWMHQPHQPL	β-casein	15	L	L
GVSKVKEAMAPKHKE	β-casein	15	E	G
RINKKIEKFQSEEQQQTE	β-casein	18	E	R
FLQPEVMGVSKVKEAMAPKHKEMPFPKYPVEPFTESQSLTLTDVENLHLPLPLLQSWM	β-casein	58	M	F
SLVYPFPGPIPNSLPQNIPPLTQTPVVV	β-casein	28	V	S
SLVYPFPGPIPNSLPQNIPPLTQTPVVVPPFLQPEVMGVS	β-casein	40	S	S
DMPIQAFLLYQE	β-casein	12	E	D
QKAVPYPQRDMPIQAFLLYQEPVLGP	β-casein	26	P	Q
AMAPKHKEMPFPKYPVEPFTESQSLTLTDVENLHLPLPLLQSWMHQP	β-casein	47	P	A
LTQTPVVVPPFLQPEVMGVSK	β-casein	21	K	L
EDELQDKIHPFAQTQSLV	β-casein	18	V	E
ELQDKIHPFAQTQS	β-casein	14	S	E
AQTQSLVYPFPGPIPNSLPQNIPPLTQ	β-casein	27	Q	A
LVYPFPGPIPNSLPQNIPPLTQTPVVVPPFLQPEVMGV	β-casein	38	V	L
EELNVPGEIVESLSS	β-casein	15	S	E
PFTESQS	β-casein	7	S	P
YPVEPFTESQSLTLTDVENLHLPLPLLQSWMHQPHQPLPPTVM	β-casein	43	M	Y
QSLTLTDVENLHLPLPLLQSWMHQP	β-casein	25	P	Q
PLPLLQSWMHQPHQPLPPTVMFPPQSVLSLSQSKVLPV	β-casein	38	V	P
QPLPPTVMFPPQSVLSLSQSKVL	β-casein	23	L	Q
VYPFPGPIPNSLPQNIPPLTQTPVVVPPFLQPEVMGVSKV	β-casein	40	V	V
VEPFTESQSLTLTDVENLHLPLPLLQSWMHQPHQPLPPTVMFPPQSVLSLSQS	β-casein	53	S	V
ELNVPGEIVESLSSSEESITRINKKIEKFQ	β-casein	30	Q	E
RELEELNVPGEIVESLSSS	β-casein	19	S	R
LTDVENLHLPLPLLQSWMH	β-casein	19	H	L
PKYPVEPFTESQSLTLTDVENLHLPLPLLQSWMHQPHQPLPPTVMFPPQSVLSLSQSKVL	β-casein	60	L	P
AFLLYQEPVLGPVRGPF	β-casein	17	F	A
VPQKAVP	β-casein	7	P	V
MPIQAFLLYQEPVLGP	β-casein	16	P	M
VLSLSQSKVLPVPQKAVPYPQRDMPIQAFLLYQEPVLGPVRGPFPI	β-casein	46	I	V
EVMGVSKVKEAMAPKHKEM	β-casein	19	M	E
SKVLPVPQKAVPYPQRDMPIQAFLLYQEPVLGPVRGPFPIIV	β-casein	42	V	S
EAMAPKHKEMP	β-casein	11	P	E
PLPLLQSWMHQPHQPLPPTVMFPPQSVLSLSQSKVLPVPQKAVPYPQ	β-casein	47	Q	P
APKHKEMPFPKYPVEPFTESQSLTLTDVENLHLPLPLLQSWMHQPHQPLPP	β-casein	51	P	A
ELNVPGEIVESLSSSEESITRINKKIEKFQSEEQQQTEDELQDKIHPFAQTQSLV	β-casein	55	V	E
PQNIPPLTQTPVVVPPFLQPEVMGVSKVKEAMAPKHKEM	β-casein	39	M	P
KHKEMPFPKYPVEPFTESQSLTLTDVENLH	β-casein	30	H	K
ITRINKKIEKFQSEEQQQTEDELQDKIHPFA	β-casein	31	A	I
LLYQEPVLGP	β-casein	10	P	L
PLTQTPVVVPPFLQPEVMGVSKVKEAMAPKHKEMPFPK	β-casein	38	K	P
LQPEVMGVSKVKEAMAPKHKEMPFPK	β-casein	26	K	L
QRDMPIQAFLLYQEPVLGPVRG	β-casein	22	G	Q
VPYPQRDMPIQAFLLYQEPV	β-casein	20	V	V
QPLPPTVMFPPQSVLSLSQSKVLPVPQKAVPYPQRDMPIQA	β-casein	41	A	Q
VYPFPGPIPNSLPQNIPPLTQTPVVVPPFLQPEVMGVSK	β-casein	39	K	V
AMAPKHKEMPFPKYPVEPFTESQSLTLT	β-casein	28	T	A
QSLVYPFPGPIPNSLPQNIPP	β-casein	21	P	Q
LLQSWMHQPHQPLPPTVMFPPQSVLSLSQSKVLPVPQKAVPYPQRDM	β-casein	47	M	L
AMAPKHKEMPFPKYPVEPFTESQSLTLTDVENLHLP	β-casein	36	P	A
SKVKEAMAPKHKEMPFPKYPVEPFTE	β-casein	26	E	S
LQPEVMGVSKVKEAMAPKHKEMPFPKYPVEPFTESQSL	β-casein	38	L	L
LQPEVMGVSKVKEAMAPKH	β-casein	19	H	L
AMAPKHKEMPFPKYPVEPFTESQSLTLTDVENLHLPL	β-casein	37	L	A
LEELNVPGEIVESLSSSEESITRINKKIEKFQSEEQQQ	β-casein	38	Q	L
GEIVESLSSSEESITRINKKIEKFQSEEQQQTEDELQDKIHPFAQTQSL	β-casein	49	L	G
ENLHLPLPLLQSWMHQPHQPLPPTVMFPPQSVLSL	β-casein	35	L	E
YQEPVLGPVRGPFP	β-casein	14	P	Y
AQTQSLVYPFPGPIPNSLPQNIPPLTQTPVVVPPFLQ	β-casein	37	Q	A
LVYPFPGPIPNSLPQNIPPLT	β-casein	21	T	L
ESQSLTLTDVENLHLPLPLLQSWMHQPHQPLPPTV	β-casein	35	V	E
DVENLHLPLPLLQSWMHQPH	β-casein	20	H	D
PLPLLQSWMHQPHQPLPPTVMFPPQSVLSLSQSKVLPVPQKAVPYP	β-casein	46	P	P
FLQPEVMGVSKVKEAMAPKHKEMPFPKYPVEPFTESQSLTLT	β-casein	42	T	F
LTDVENLHLPLPLLQSWMHQPHQPLPPTVMFPPQSVLSLSQ	β-casein	41	Q	L
SEESITRINKKIEKFQSEEQQQTEDELQDKIHPFAQTQSLVYPFPGPIPNSLPQNIP	β-casein	57	P	S
YPQRDMPIQAFLLYQEPVLGPVRGPFPIIV	β-casein	30	V	Y
VEPFTESQSLTLTDVENLHLPLPL	β-casein	24	L	V
HLPLPLLQSWMHQPHQPLPPTVMFPPQSVLSLSQ	β-casein	34	Q	H
LTLTDVENLHLPLPLLQSWMHQPHQPLPP	β-casein	29	P	L
GEIVESLSSSEESITRINKKIEKFQSEEQQQTED	β-casein	34	D	G
KIHPFAQTQSLVYPF	β-casein	15	F	K
LQSWMHQPHQPLPPTVMFPPQSVLSLSQSKVLPVPQKAVPYPQR	β-casein	44	R	L
LPLPLLQSWMHQPHQPLPPTVMFPPQSVL	β-casein	29	L	L
PVPQKAVPYPQRDMPIQAFLLYQ	β-casein	23	Q	P
AQTQSLVYPFPGPIPNSLPQNIPPLT	β-casein	26	T	A
LSQSKVLPVPQKAVPYPQR	β-casein	19	R	L
ESQSLTLTDVENLHLPLPLLQSWMHQPHQPLPPTVMF	β-casein	37	F	E
VSKVKEAMAPKHKEMPFPKYPVEPFTESQSL	β-casein	31	L	V
PGEIVESLSSSEESITRINKKIEKFQSEEQQQTEDELQDKIHPFA	β-casein	45	A	P
FAQTQSLVYPFPGPIPNSLPQNIPPLTQTP	β-casein	30	P	F
FQSEEQQQTEDELQDKIHPFAQTQSLV	β-casein	27	V	F
RELEELNVPGEIVESLSSSEE	β-casein	21	E	R
LPPTVMFPP	β-casein	9	P	L
FPGPIPNSLPQNIPPLTQTPVVVPPFLQPEVMGVSKVKEAMAPKHKEMPFPKYPVEPFTE	β-casein	60	E	F
KEAMAPKHKEMPFPKYPVEPFTESQSLTLTDVENLHLPLPL	β-casein	41	L	K
PLLQSWMHQPHQPLPPTVMFP	β-casein	21	P	P
PVVVPPFLQPEVM	β-casein	13	M	P
EKFQSEEQQQTEDELQDKIHPFAQTQSL	β-casein	28	L	E
KIEKFQSEEQQQTEDELQDKIHPFAQTQSLVYPFPGP	β-casein	37	P	K
VPGEIVESLSSSEESITRINKKIEKFQSEEQQQ	β-casein	33	Q	V
SVLSLSQSKVLPVPQKAVPYPQRDMPI	β-casein	27	I	S
SITRINKKIEKFQSEEQQQ	β-casein	19	Q	S
ELQDKIHPFA	β-casein	10	A	E
NVPGEIVESLSSSEESITRINKK	β-casein	23	K	N
VPQKAVPYPQRDMPIQAFLLY	β-casein	21	Y	V
QPLPPTVMFPPQSVLSLSQSKVLPVPQKAVPYPQRDMPIQAFLLYQ	β-casein	46	Q	Q
KYPVEPFTESQSLTL	β-casein	15	L	K
PPQSVLSLSQSKVLPVPQKAVPYPQRDMPIQAFLLYQEPVLG	β-casein	42	G	P
LQDKIHPFAQTQSLVYPFPGPIPNSLPQNIPPLTQTPVVV	β-casein	40	V	L
QPHQPLPPT	β-casein	9	T	Q
LSSSEESITRINKKIEKFQSEEQQQTEDELQDKIHPFAQTQSLVYPFPGPIPN	β-casein	53	N	L
FTESQSLTLTDVENLHLPLPLLQSWMHQPH	β-casein	30	H	F
QNIPPLTQTPVVVPPFLQPEV	β-casein	21	V	Q
TPVVVPPFLQPEVMGVSKVKEAM	β-casein	23	M	T
FPPQSVLSLSQSKVLPVPQKAVPYPQRDMP	β-casein	30	P	F
ELNVPGEIVESLSSSEESITRINKKIEKFQSEEQQQTEDELQDKIH	β-casein	46	H	E
LQDKIHPFAQTQSLVYP	β-casein	17	P	L
NVPGEIVESLS	β-casein	11	S	N
LQDKIHPFAQTQSLVYPFPG	β-casein	20	G	L
VPYPQRDMPIQAFLLYQEPVLGPV	β-casein	24	V	V
LNVPGEIVESLSSSEESITRINK	β-casein	23	K	L
PEVMGVS	β-casein	7	S	P
QSLTLTDVENLHL	β-casein	13	L	Q
FPKYPVEPFTESQSLTLTDVENLHLPLPLLQS	β-casein	32	S	F
KVLPVPQ	β-casein	7	Q	K
VVPPFLQPEVMGVSKVKEAMAPKHKEMPFPKYPVEPFTESQSLT	β-casein	44	T	V
LQDKIHPFAQTQSLVYPFPGP	β-casein	21	P	L
AQTQSLVYPFPGPIPNSLPQNIPPLTQTPVVVPPFLQPEVMGVSK	β-casein	45	K	A
LNVPGEIVESLSSSEESITRINKKIEKFQSEEQ	β-casein	33	Q	L
TQTPVVVPPFLQPEVMGVS	β-casein	19	S	T
PFAQTQSLVYPFPGPIPNSLP	β-casein	21	P	P
LTLTDVENLHLPLPLLQSWMHQPHQPLPPTVMFPPQS	β-casein	37	S	L
LPPTVMFPPQSVLSLSQSKV	β-casein	20	V	L
LSLSQSKVLPVPQKAVPYPQRDMPIQAFLLYQE	β-casein	33	E	L
PPTVMFPPQSVLSLSQSKVLPVPQKAVPYPQRDMPIQAFLLYQEPV	β-casein	46	V	P
LPLPLLQSWMHQPHQPLPPTVMFPPQSVLSLSQSK	β-casein	35	K	L
NSLPQNIPPLTQTPVVVPPFLQPEVMGVS	β-casein	29	S	N
FTESQSLTLT	β-casein	10	T	F
GPIPNSLPQNIPPL	β-casein	14	L	G
TDVENLHLPLPLLQ	β-casein	14	Q	T
QSLVYPFPGPI	β-casein	11	I	Q
QPHQPLPPTVMFPPQSVLSL	β-casein	20	L	Q
QPEVMGVSKVKEAMAPKHKEM	β-casein	21	M	Q
PFAQTQSLVYPFPGPIPNSL	β-casein	20	L	P
PGPIPNSLPQNIP	β-casein	13	P	P
FPGPIPNSLPQ	β-casein	11	Q	F
MPFPKYPVEPFTESQSLTLTDVENLHLPLPLLQSWMHQPHQPLPPTVMFPPQ	β-casein	52	Q	M
SEEQQQTEDELQDKIHPFAQTQSLVYPFPGPIPNSLPQNIPPLTQTPVVVPPF	β-casein	53	F	S
ITRINKKIEKFQSEEQQQTEDEL	β-casein	23	L	I
YPFPGPIPNSLPQNIPPLTQ	β-casein	20	Q	Y
NLHLPLPLLQSWMHQP	β-casein	16	P	N
LLQSWMHQPHQPLPPTVMFPPQSVLSLSQSK	β-casein	31	K	L
SEESITRINKKIEKFQSEEQQQTEDELQDKIHPFAQTQSLVYPFPGPI	β-casein	48	I	S
FTESQSLTLTDVENLHLPLPLLQ	β-casein	23	Q	F
VLPVPQK	β-casein	7	K	V
IKHQGLPQEVLNENL	αs1-casein	15	L	I
LGTQYTDAPSFSDIPNPIGSENSEKTTMP	αs1-casein	29	P	L
VAPFPEVFGKEKVNE	αs1-casein	15	E	V
IHAQQKEPMIGVNQE	αs1-casein	15	E	I
GTQYTDAPSFSDIPNPIGSENSEKTTMP	αs1-casein	28	P	G
TDAPSFSDIPNPIGSENSEKTTMP	αs1-casein	24	P	T
FVAPFPEVFGKEKVNE	αs1-casein	16	E	F
IQKEDVPSERY	αs1-casein	11	Y	I
LEQLLRLKKYKVPQLE	αs1-casein	16	E	L
LEQLLRLKKYKVPQ	αs1-casein	14	Q	L
IKHQGLPQEVLNENLLR	αs1-casein	17	R	I
LRLKKYKVPQLE	αs1-casein	12	E	L
LDAYPSGAWYYVPL	αs1-casein	14	L	L
IHAQQKEPMIG	αs1-casein	11	G	I
IKHQGLPQEVLNENLLRF	αs1-casein	18	F	I
LDAYPSGAWYYVP	αs1-casein	13	P	L
LLRLKKYKVPQLE	αs1-casein	13	E	L
LRLKKYKVPQ	αs1-casein	10	Q	L
GLPQEVLNENL	αs1-casein	11	L	G
LEIVPNSAEERLHSMKE	αs1-casein	17	E	L
KHPIKHQGLPQEVLNENL	αs1-casein	18	L	K
GLPQEVLNENLLR	αs1-casein	13	R	G
LGYLEQLLRLKKYKVPQLE	αs1-casein	19	E	L
LLRLKKYKVPQ	αs1-casein	11	Q	L
IKHQGLPQEVLNEN	αs1-casein	14	N	I
GLPQEVLNENLLRF	αs1-casein	14	F	G
FSDIPNPIGSENSEKTTMP	αs1-casein	19	P	F
LDAYPSGAWY	αs1-casein	10	Y	L
IHAQQKEPMIGVNQELAYFYPELFRQ	αs1-casein	26	Q	I
LKKYKVPQLE	αs1-casein	10	E	L
HIQKEDVPSERY	αs1-casein	12	Y	H
PIGSENSEKTTMP	αs1-casein	13	P	P
LGYLEQLLRLKKYKVPQ	αs1-casein	17	Q	L
IKHQGLPQEVLNE	αs1-casein	13	E	I
APFPEVFGKEKVNE	αs1-casein	14	E	A
PNSAEERLHSM	αs1-casein	11	M	P
LDAYPSGAWYYVPLGTQY	αs1-casein	18	Y	L
KHPIKHQGLPQEVLNENLLRF	αs1-casein	21	F	K
KHPIKHQGLPQE	αs1-casein	12	E	K
EQLLRLKKYKVPQ	αs1-casein	13	Q	E
IHAQQKEPMIGVNQELAY	αs1-casein	18	Y	I
LDAYPSGAWYYVPLGTQYTDAPSFSDIPNP	αs1-casein	30	P	L
LAYFYPELFRQ	αs1-casein	11	Q	L
LAYFYPELFRQFYQ	αs1-casein	14	Q	L
FYPELFRQFYQ	αs1-casein	11	Q	F
IVPNSAEERLHSMKEG	αs1-casein	16	G	I
IVPNSAEERLHSM	αs1-casein	13	M	I
VAPFPEVFGKEK	αs1-casein	12	K	V
SESTEDQAMEDIKQMEAESISSSEEIVPN	αs1-casein	29	N	S
IQKEDVPSERYL	αs1-casein	12	L	I
KEGIHAQQKEPMIGVNQE	αs1-casein	18	E	K
FVAPFPEVFGKEKVNEL	αs1-casein	17	L	F
RPKHPIKHQGLPQEVLNENL	αs1-casein	20	L	R
PFPEVFGKEKVNEL	αs1-casein	14	L	P
QLLRLKKYKVPQ	αs1-casein	12	Q	Q
QKEDVPSERY	αs1-casein	10	Y	Q
LDAYPSGAWYYVPLGTQYTDAPS	αs1-casein	23	S	L
YVPLGTQYTDAPSFSDIPNP	αs1-casein	20	P	Y
RPKHPIKHQGLPQEVLNENLLR	αs1-casein	22	R	R
PQEVLNENLLRF	αs1-casein	12	F	P
GLPQEVLNEN	αs1-casein	10	N	G
PSERYLGYLE	αs1-casein	10	E	P
PEVFGKEKVNE	αs1-casein	11	E	P
LDAYPSGAWYYVPLGTQ	αs1-casein	17	Q	L
IVPNSAEERLHS	αs1-casein	12	S	I
PEVFGKEKVNELSKDIG	αs1-casein	17	G	P
FVAPFPEVFGK	αs1-casein	11	K	F
PLGTQYTDAPSFSDIPNPIGSENSEKTTMP	αs1-casein	30	P	P
EQLLRLKKYKVPQL	αs1-casein	14	L	E
QLLRLKKYKVPQL	αs1-casein	13	L	Q
PNPIGSENSEKTTMP	αs1-casein	15	P	P
IVPNSVEQKHIQKEDVPSERYL	αs1-casein	22	L	I
PSFSDIPNPIGSENSEKTTMP	αs1-casein	21	P	P
PSGAWYYVPLGTQY	αs1-casein	14	Y	P
QAMEDIKQMEAESISSSEEIVPNSVEQ	αs1-casein	27	Q	Q
DIKQMEAESISSSEEIVP	αs1-casein	18	P	D
RFFVAPFPEVFGKEKVNELS	αs1-casein	20	S	R
SAEERLHSMKEGIHAQQK	αs1-casein	18	K	S
YYVPLGTQYTDAPSFSDIPN	αs1-casein	20	N	Y
PFPEVFGKEK	αs1-casein	10	K	P
YVPLGTQYTDAPSFSDIPNPIGSENSEKTTMP	αs1-casein	32	P	Y
FVAPFPE	αs1-casein	7	E	F
GVNQELAYFYPELFRQFYQLDAYPSGAWYYVPLGTQYTDAPSFSDIPNPIGSENS	αs1-casein	55	S	G
FYPELFRQ	αs1-casein	8	Q	F
LAYFYPELFRQFYQLDAYPSGAWYYVPLGTQYTDAPSFSDIPNPIGSENSEKTTMP	αs1-casein	56	P	L
VLNENLLRF	αs1-casein	9	F	V
AYFYPELFRQFYQLDAYPSGAWYYVPLGT	αs1-casein	29	T	A
LDAYPSGAWYYVPLGTQYTDAPSFSDIPNPIGSENSEKTTMPLW	αs1-casein	44	W	L
YYVPLGTQYTDAPSFSDIPNPIGSENSEKTTMP	αs1-casein	33	P	Y
FGKEKVNE	αs1-casein	8	E	F
RPKHPIKHQGLPQEVL	αs1-casein	16	L	R
GAWYYVPLGTQYTDAPSFSDIPNPIGSENSEKTTMP	αs1-casein	36	P	G
VLNENLLR	αs1-casein	8	R	V
FYQLDAYPSGAWYYVPLGTQYTDAPSFSDIPNPIGSENSEKTTMP	αs1-casein	45	P	F
GVNQELAYFYPELFRQFYQLDAYPSGAWYYVPLGTQYTDAPSFSDIPNPIGSENSE	αs1-casein	56	E	G
KYKVPQLE	αs1-casein	8	E	K
KHPIKHQGLPQEVLNENLLR	αs1-casein	20	R	K
YPSGAWYYVPLGTQYTDAPSFSDI	αs1-casein	24	I	Y
VAPFPEVF	αs1-casein	8	F	V
IHAQQKEPM	αs1-casein	9	M	I
IHAQQKEPMIGVNQELAYFYPELFRQFYQ	αs1-casein	29	Q	I
AYPSGAWYYVPLGTQYTDAPSFSDIPNPIGSENSEKTTMPL	αs1-casein	41	L	A
ENLLRFFVAPFPEVFGKE	αs1-casein	18	E	E
DQAMEDIKQMEAESISSSEEIVPNSVEQKHIQ	αs1-casein	32	Q	D
LDAYPSGAW	αs1-casein	9	W	L
TQYTDAPSFSDIPNPIGSENSEKTTMP	αs1-casein	27	P	T
LNENLLRFFVAPFPEVFGKEKVNELSKDIGS	αs1-casein	31	S	L
KVNELSKDIGSESTEDQAMEDIKQMEA	αs1-casein	27	A	K
GKEKVNE	αs1-casein	7	E	G
YPSGAWYYVPLGTQYTDAPSFSDIPNPI	αs1-casein	28	I	Y
FYQLDAYPSGAWYYVPLGTQYTDAPSFSDIPNPIGSENSEKTTMPLW	αs1-casein	47	W	F
APSFSDIPNPIGSENSEKTTMP	αs1-casein	22	P	A
AYPSGAWYYVPLGTQYTDAPSFSDIPNPIGSENSEKTTMP	αs1-casein	40	P	A
DAYPSGAWYYVPLGTQYTDAPSFSDIPNPIGSENSEKTTMP	αs1-casein	41	P	D
ERLHSMKEGIHAQQKEPMIGVNQELAYFYPELFRQFYQLDAYPSGAWYYVPLGTQYTD	αs1-casein	58	D	E
LDAYPSGAWYYVPLGTQYTDAPSFSDIPN	αs1-casein	29	N	L
LKKYKVPQ	αs1-casein	8	Q	L
LDAYPSGAWYYVPLGTQYTDAPSFSDIPNPIGSEN	αs1-casein	35	N	L
EGIHAQQKEPMIGVNQELAY	αs1-casein	20	Y	E
PEVFGKEKVNELSKDIGSESTEDQAMEDIKQMEAESISSSEEIVPNSVEQKHIQK	αs1-casein	55	K	P
IVPNSAEERLHSMKEGIHAQQKEPMIGVNQELAYFYPELFRQFYQLDAY	αs1-casein	49	Y	I
AWYYVPLGTQYTDAPSFSDIPNPIGSENSEKTTMP	αs1-casein	35	P	A
IGVNQELAYFYPELFRQFYQ	αs1-casein	20	Q	I
VNQELAYFYPELFRQFYQLDAYPSGAWY	αs1-casein	28	Y	V
EGIHAQQKEPM	αs1-casein	11	M	E
PELFRQFYQLDAYPSGAWYYVPLGTQYTDAPSFSDIPNPIGSENS	αs1-casein	45	S	P
VAPFPEVFGKEKVNELSKDIGSESTEDQAMEDIKQMEAESISSSEEIVPNSVEQKHIQ	αs1-casein	58	Q	V
LGYLEQL	αs1-casein	7	L	L
FVAPFPEVF	αs1-casein	9	F	F
PEVFGKEKVNELSKDIGSESTEDQAMEDIKQMEAE	αs1-casein	35	E	P
GIHAQQKEPMIGVNQELA	αs1-casein	18	A	G
EIVPNSVEQKHIQKEDVPSERYLGYLEQLLRL	αs1-casein	32	L	E
SKDIGSESTEDQAMEDIKQMEAESISSSEEIVPNSVEQKHIQKEDVPSERYLGY	αs1-casein	54	Y	S
GYLEQLL	αs1-casein	7	L	G
FYPELFRQFYQLDAYPSGAWYYVPLGTQYTDAPSFSDIPNPIGSENSEKTTMPLW	αs1-casein	55	W	F
VFGKEKVNELSKDIGSESTEDQAMEDIKQMEAESISSSEEIVPNSVEQKHIQKEDVP	αs1-casein	57	P	V
IVPNSVEQKHIQ	αs1-casein	12	Q	I
FYPELFRQFYQLDAYPSGAWYYVPLGTQYTDAPSFSDIPNPIGSENSEKTTM	αs1-casein	52	M	F
LGTQYTDAPSFSDIPNP	αs1-casein	17	P	L
DAPSFSDIPNPIGSENSEKTTMPL	αs1-casein	24	L	D
EERLHSMKEGIHAQQKEPMIGVNQELAYFYPELFRQFYQLDAYPSGAWYYV	αs1-casein	51	V	E
SFSDIPNPIGSENSEKTTMP	αs1-casein	20	P	S
VAPFPEVFGKEKVN	αs1-casein	14	N	V
VAPFPEVFGKEKVNELSKDIGSESTEDQAMEDIKQMEA	αs1-casein	38	A	V
VFGKEKVNELSKDIGSESTEDQAMEDIKQMEAESISS	αs1-casein	37	S	V
LPQEVLNEN	αs1-casein	9	N	L
IHAQQKEPMIGVNQELAYFYPELFRQFYQLDAYPSGAWYYVPLGTQYTDAPSFSDIPN	αs1-casein	58	N	I
LEIVPNSAEERLHSMKEGIHAQQKEPMIGVNQELAYF	αs1-casein	37	F	L
QQKEPMIGVNQELAYFYPELFRQFYQLDAYPSGAWYYVPLGTQYTDAP	αs1-casein	48	P	Q
LRFFVAPFPEVFGKEKVNELSKDI	αs1-casein	24	I	L
QMEAESISSSEEIVPNSVEQKHIQKEDVPSERYLGYLEQLLRLKKYKVPQLEIV	αs1-casein	54	V	Q
PFPEVFGKEKVNELSK	αs1-casein	16	K	P
MEDIKQMEAESISSSEEIVPNS	αs1-casein	22	S	M
FVAPFPEVFGKEKVNELSKDIGSESTEDQAMEDIKQMEAESISSSEEIVPNSVEQKH	αs1-casein	57	H	F
LDAYPSGAWYYVPLGTQYTDAPSFSDIPNPIGSENSEKTTMPL	αs1-casein	43	L	L
LDAYPSG	αs1-casein	7	G	L
VNELSKDIGSESTEDQAMEDIKQMEAESISSSEEIVPNSVEQKHIQKEDVPSERYL	αs1-casein	56	L	V
LDAYPSGAWYYVPLGTQYTDAPSF	αs1-casein	24	F	L
ELAYFYPELFRQFYQLDAYPSGAWYYVPLGTQ	αs1-casein	32	Q	E
QGLPQEVLNENLLRFFVAPFPEVFGKEKVNELSKDIGSESTEDQAMEDIKQME	αs1-casein	53	E	Q
SAEERLHSMKEGIHAQQKEPMIGVNQ	αs1-casein	26	Q	S
IVPNSAEER	αs1-casein	9	R	I
VLNENLLRFFVAPFP	αs1-casein	15	P	V
GVNQELAYFYPELFRQ	αs1-casein	16	Q	G
QLDAYPSGAWYYVPLGTQYTDAPSFSD	αs1-casein	27	D	Q
NENLLRF	αs1-casein	7	F	N
QLEIVPNSAEERLHSMKEGIHAQQKEPMIGVNQELAYF	αs1-casein	38	F	Q
SERYLGYLEQLLRLKKYKVPQLEI	αs1-casein	24	I	S
QLLRLKKYKVPQLEIVPNSAEERLHSMKEGIHAQQKEPMIGVNQELAYFYPELFRQF	αs1-casein	57	F	Q
FPEVFGKEKVNELSKDIGSESTED	αs1-casein	24	D	F
IQKEDVPSERYLGY	αs1-casein	14	Y	I
RYLGYLEQLLRLKKYKVPQLEIVPNSAEERLHSM	αs1-casein	34	M	R
KEDVPSERY	αs1-casein	9	Y	K
LHSMKEGIHAQQKEP	αs1-casein	15	P	L
EKVNELSKDIGSESTEDQAMEDIKQMEAESISSSEEIVPNSVEQK	αs1-casein	45	K	E
QAMEDIKQMEAESISSSEEIVPNSVEQKHIQKEDVPSERYLGYLEQLLRLKKYKVPQLEI	αs1-casein	60	I	Q
ELAYFYPELFRQFYQLDAYPSGAWYYVPLGT	αs1-casein	31	T	E
APFPEVFGKEKVNELSKDIGSESTEDQAMEDIKQMEAES	αs1-casein	39	S	A
IQKEDVPSERYLGYLEQLLRLKKYKVPQ	αs1-casein	28	Q	I
GAWYYVPL	αs1-casein	8	L	G
NENLLRFFVAPFPEVFGKEKVNELSKDIGSESTEDQAMEDIKQMEAESISSSE	αs1-casein	53	E	N
EKVNELSKDIGSESTEDQAMEDIKQMEAESISSSEE	αs1-casein	36	E	E
PQEVLNE	αs1-casein	7	E	P
EIVPNSVEQKHIQKEDVPSERYLGYLEQLLRLKK	αs1-casein	34	K	E
LNENLLR	αs1-casein	7	R	L
GLPQEVLNENLLRFFVAPFPEVFGKEKVNELSKDIGS	αs1-casein	37	S	G
VLNENLLRFFVAPF	αs1-casein	14	F	V
GLPQEVLNENLLRFFVAPFP	αs1-casein	20	P	G
LGTQYTDAPSFSDIPNPIGSENSEKTT	αs1-casein	27	T	L
AYPSGAWYYVPLGTQYTDAPSFSDIPNPI	αs1-casein	29	I	A
GTQYTDAPSFSDIPNP	αs1-casein	16	P	G
QGLPQEVLNENLLRFFVAPFPEVFGK	αs1-casein	26	K	Q
PSGAWYYVP	αs1-casein	9	P	P
PSERYLGYLEQLLRLKKYKVPQLEIVPN	αs1-casein	28	N	P
KEGIHAQQKEPMIGVNQELAYFYPELFRQFYQ	αs1-casein	32	Q	K
YPELFRQ	αs1-casein	7	Q	Y
GYLEQLLRLKKYKVPQLEIVPNSAEERLHSMKEGIHAQQKEPMIGV	αs1-casein	46	V	G
EVLNENLLRFFVAPFPEVFGKEKVNELSKDIGSESTEDQAMEDIKQMEAESISSSEE	αs1-casein	57	E	E
PFPEVFGKEKVNE	αs1-casein	13	E	P
ESTEDQAMEDIKQMEAESISSSE	αs1-casein	23	E	E
QLEIVPNSAEERLHSMKEGIHAQQ	αs1-casein	24	Q	Q
SKDIGSESTEDQAMEDIKQMEAESISSSEEIVPNSVEQKH	αs1-casein	40	H	S
AQQKEPMIGVNQELAY	αs1-casein	16	Y	A
VNELSKDIGSESTEDQAMEDIKQMEA	αs1-casein	26	A	V
QFYQLDAYPSGAWYYVPLGTQYTDAPSF	αs1-casein	28	F	Q
KKYKVPQLEIVPNSAEERLHSMKEGIHAQQKEPMIGV	αs1-casein	37	V	K
DQAMEDIKQMEAESISSSEEIVPNSVEQ	αs1-casein	28	Q	D
SMKEGIHAQQKEPMIGVNQELAYFYPELFRQFYQLDAYPSGAWYYVPLGTQYT	αs1-casein	53	T	S
LNENLLRFFVAPFPEVFGKEKVNELSKDIGSESTEDQAMEDIKQMEAESISSSEEI	αs1-casein	56	I	L
PSFSDIPNPIGSENS	αs1-casein	15	S	P
MKEGIHAQQ	αs1-casein	9	Q	M
EEIVPNSVEQKHIQKEDVPSERYLGYLEQLL	αs1-casein	31	L	E
YKVPQLEIVPNSAEERLHSMKEGIHAQQKEP	αs1-casein	31	P	Y
VPSERYLGYLEQLLRLKKYKVPQLEIVPNSA	αs1-casein	31	A	V
RPKHPIKHQGLPQEVLNENLLRFFVAPFPEVFGKEKVNE	αs1-casein	39	E	R
PFPEVFGKEKVNELSKDIGS	αs1-casein	20	S	P
ISSSEEIVPNSVEQKHIQKEDVPS	αs1-casein	24	S	I
EERLHSMKEGIHAQQKE	αs1-casein	17	E	E
EDVPSERYLGYLEQLLRLKKYKVPQLEIVPNSAEERLHSMKEGIHAQ	αs1-casein	47	Q	E
DIGSESTEDQAMEDIKQMEAESISSSEEIVPNSV	αs1-casein	34	V	D
YYVPLGTQYTD	αs1-casein	11	D	Y
RYLGYLEQLLRLKKYKVPQLEIVPNSAEERLHSMKEGIHAQQKEPMIGVNQELAYFYPE	αs1-casein	59	E	R
TEDQAMEDIKQMEAESISSSEEIVPNSVEQKHIQKEDV	αs1-casein	38	V	T
LEIVPNSAEERLHSMKEG	αs1-casein	18	G	L
PNSAEERLHSMKEGIHAQQKEPMI	αs1-casein	24	I	P
QKEPMIGVNQELAYFYPELFRQ	αs1-casein	22	Q	Q
MKEGIHAQQKEPMIGVNQELAYFYPELFRQFYQLDAYPSGAW	αs1-casein	42	W	M
FSDIPNPIGSEN	αs1-casein	12	N	F
QYTDAPSFSDIPNPIGSENSEK	αs1-casein	22	K	Q
YKVPQLEIVPNSAEERLHSMK	αs1-casein	21	K	Y
QGLPQEVLNENLLRFFVAPFPEVFGKEKVNELSK	αs1-casein	34	K	Q
SERYLGYLEQLLRL	αs1-casein	14	L	S
HPIKHQGLPQEVLNENLLRFFVAPFPEVFGK	αs1-casein	31	K	H
LNENLLRFFVAPFPEVFGKEKVNELSKDIGSES	αs1-casein	33	S	L
YPSGAWYYVPLGTQY	αs1-casein	15	Y	Y
PSERYLGYLEQLLRLKKYKVPQLEIV	αs1-casein	26	V	P
QQKEPMIGVNQELAYFYPELFRQFYQLDAYPSGAWYYVPL	αs1-casein	40	L	Q
NLLRFFVAPFPEVFGKEKVNELSKDIGSES	αs1-casein	30	S	N
NQELAYFYPELFRQFY	αs1-casein	16	Y	N
APFPEVFGKEKVNELSKDIGSESTEDQAM	αs1-casein	29	M	A
VEQKHIQKE	αs1-casein	9	E	V
SVEQKHIQKEDVPSERYLGYLEQLLR	αs1-casein	26	R	S
DIKQMEAESISSSEEIVPNSVEQKHIQKED	αs1-casein	30	D	D
QLEIVPNSAEERLHSM	αs1-casein	16	M	Q
ELFRQFYQLDAYPSGAWYYVPLGTQYTDAPSFSDIPNPIGSENS	αs1-casein	44	S	E
KKYKVPQ	αs1-casein	7	Q	K
YVPLGTQYTDAPSFSDIPNPIGSEN	αs1-casein	25	N	Y
VPSERYLGYLEQLLRLKKYKVPQLEIVPNSAEERLHSMKEGIHAQQK	αs1-casein	47	K	V
SSSEEIVPNSVEQKHIQKEDVPSERYLGYLEQLLRLK	αs1-casein	37	K	S
PNSAEERLHSMKEGIHAQQKEPMIGVNQELAYFYPELFRQ	αs1-casein	40	Q	P
QEVLNENLLRFFVAPFPEVFGKEKVNE	αs1-casein	27	E	Q
FRQFYQLDAYPSGAWYYVPLGTQYTDAPSFSDI	αs1-casein	33	I	F
QGLPQEVLNENLLRFFVAPFPEVFGKEKVNELSKDIGSESTEDQAMEDIK	αs1-casein	50	K	Q
ELSKDIGSESTEDQAMEDIKQMEAESISSSEEIVPNSVEQKHIQKEDVPSE	αs1-casein	51	E	E
AYFYPELFRQFYQLDAYPSGAWYYVPLGTQYTD	αs1-casein	33	D	A
EAESISSSEEIVPNSVEQKHIQKEDVPSERYLGYLEQ	αs1-casein	37	Q	E
YLGYLEQLLRLKKYKVPQLEIVPNSAEERLHSMKEGIHAQQKEPMIGVNQELAYF	αs1-casein	55	F	Y
SGAWYYVPLGTQYTDAPSFSDIPNPIGSENSEKT	αs1-casein	34	T	S
EDQAMEDIKQMEAESISSSEEIVPNSVE	αs1-casein	28	E	E
EVLNENLLRFFVAPFPEVFGKEKVNELSKDIGS	αs1-casein	33	S	E
VAPFPEVFGKEKVNELSKDIGSESTEDQAMEDIKQMEAESISS	αs1-casein	43	S	V
AEERLHSMKEGIHAQQKEPMIGVNQELAYFYPELFRQFYQLDAYPS	αs1-casein	46	S	A
LPQEVLNENLLRFFVAPFPEVFGKEKVNELSKDI	αs1-casein	34	I	L
SISSSEEIVPNSVEQKHIQKEDVPSERYLGYLEQ	αs1-casein	34	Q	S
ERYLGYLEQL	αs1-casein	10	L	E
SERYLGYLEQLLRLKKYKVPQLEIVPNSAEERLHSMKEGIHAQQKEPMIGVNQE	αs1-casein	54	E	S
HQGLPQEVLNENLLRFFVAPFPEVFGKEK	αs1-casein	29	K	H
PQEVLNENLLR	αs1-casein	11	R	P
SISSSEEIVPNSVEQKHIQKEDVP	αs1-casein	24	P	S
FRQFYQLDAYPSGAWYYVPLGTQYT	αs1-casein	25	T	F
FPEVFGKEKVNELSKDIGSESTEDQAMEDIKQMEAESISSSEEI	αs1-casein	44	I	F
EVLNENLLRFFVAPFPEVFGKEKVNELSKDIG	αs1-casein	32	G	E
AEERLHSMKEGIHAQQKEPMIGVNQELAYFYPELFRQFYQLDAYPSGAWYYVPLGTQY	αs1-casein	58	Y	A
ELSKDIGSESTEDQAMEDIKQMEAESI	αs1-casein	27	I	E
LYQGPIVLNPWDQVKRN	αs2-casein	17	N	L
LTEEEKNRLNF	αs2-casein	11	F	L
VYQHQKAMKPWIQPKTK	αs2-casein	17	K	V
AMKPWIQPKTK	αs2-casein	11	K	A
TEEEKNRLNF	αs2-casein	10	F	T
MKPWIQPKTK	αs2-casein	10	K	M
LYQGPIVLNPWDQVKR	αs2-casein	16	R	L
QGPIVLNPWDQVKRN	αs2-casein	15	N	Q
EVKITVDDKHYQKA	αs2-casein	14	A	E
SSEESIISQETYKQEKNMAINPSK	αs2-casein	24	K	S
GPIVLNPWDQVKRN	αs2-casein	14	N	G
LYQGPIVLNPWDQ	αs2-casein	13	Q	L
LTEEEKNRLN	αs2-casein	10	N	L
PIVLNPWDQVKRN	αs2-casein	13	N	P
LNPWDQVKRN	αs2-casein	10	N	L
TEVFTKKTKLTEEEKNRLN	αs2-casein	19	N	T
LYQGPIVLNP	αs2-casein	10	P	L
EEKNRLNFLKKISQRYQKFALPQYLKTVY	αs2-casein	29	Y	E
YQGPIVLNPWDQVKRN	αs2-casein	16	N	Y
VATEEVKITVD	αs2-casein	11	D	V
PQYLQYLYQGPIVLNPWDQVKRNAVPIT	αs2-casein	28	T	P
SQRYQKFALPQYLK	αs2-casein	14	K	S
FYQKFPQY	αs2-casein	8	Y	F
AVPITPT	αs2-casein	7	T	A
VDMESTEVFTKKTKLTEEEKNRLNFLKKISQRY	αs2-casein	33	Y	V
HVSSSEESIISQETYKQEKNMAINPSKENLCSTFCKEVVRNANEEEYSIGSSSEES	αs2-casein	56	S	H
ETYKQEKNMAINPSKENLCSTFCKEVVRNANEEE	αs2-casein	34	E	E
TKLTEEEKNRLNFLKKISQRYQ	αs2-casein	22	Q	T
SQETYKQEKNMAINPSKENLCSTFCKEVVRNANEEEYSIGSSSEESAEV	αs2-casein	49	V	S
ISQRYQK	αs2-casein	7	K	I
LTEEEKNR	αs2-casein	8	R	L
QRYQKFALPQYLKTVYQHQKAMKPWIQPKTKV	αs2-casein	32	V	Q
ISQRYQKF	αs2-casein	8	F	I
VDDKHYQKA	αs2-casein	9	A	V
SQRYQKF	αs2-casein	7	F	S
EESIISQ	αs2-casein	7	Q	E
FYQKFPQYL	αs2-casein	9	L	F
EHVSSSEESIISQETYKQEKNMAINPSKENLCSTFCKEVVRNANEEEYSIGSSSEES	αs2-casein	57	S	E
QYLQYLYQGPIVLNPWDQVKRNAVPITPTLNREQ	αs2-casein	34	Q	Q
ALNEINQ	αs2-casein	7	Q	A
TEEEKNR	αs2-casein	7	R	T
SQETYKQEKNMAINPSKENLCSTFCKEVVRNANEEEYSIGSSSEESAEVATEEVKI	αs2-casein	56	I	S
EEEKNRLNF	αs2-casein	9	F	E
TEEVKIT	αs2-casein	7	T	T
ENSKKTVDMESTEVFTKKTKLTEEEK	αs2-casein	26	K	E
YLKTVYQHQKAMKP	αs2-casein	14	P	Y
KENLCSTFCKEVVRNANEEEYSIGSSSEESAEVATEEVKITVDDKHYQKALNEINQ	αs2-casein	56	Q	K
QLSTSEENSKKTVDMESTEVFTK	αs2-casein	23	K	Q
DDKHYQKA	αs2-casein	8	A	D
ISQETYKQEKNMAINPSKENLCSTFCKEVVRNANEEEYSIGSSSEESAEV	αs2-casein	50	V	I
VYQHQKA	αs2-casein	7	A	V
GSSSEESAEVATEEVKITVDDKHYQKALNEINQ	αs2-casein	33	Q	G
INPSKEN	αs2-casein	7	N	I
EVKITVDDKHYQKALNEINQFYQKFPQYLQYLYQGPIVL	αs2-casein	39	L	E
VDDKHYQK	αs2-casein	8	K	V
KPWIQPKT	αs2-casein	8	T	K
VPITPTLNREQLSTSEENSKKTVDMESTEVFTKKTKLTEEEKNRLNFLKKISQRYQKF	αs2-casein	58	F	V
KQEKNMAINPSKENLCSTFCKEV	αs2-casein	23	V	K
ISQETYKQEKNMAINPSKENLCSTFCKEVVRNANEEEYSIG	αs2-casein	41	G	I
ALNEINQFYQKFPQY	αs2-casein	15	Y	A
NQFYQKFPQYLQYLYQGPIVLNPWDQVKRNAV	αs2-casein	32	V	N
EEEKNRLNFLKKISQRYQKFALP	αs2-casein	23	P	E
YQKFALPQYLKTVYQHQKAM	αs2-casein	20	M	Y
VDDKHYQKALNEINQFYQKFPQYLQYLYQGPIVLNP	αs2-casein	36	P	V
EVFTKKTKLTEEEKNRLNFLKKISQRYQ	αs2-casein	28	Q	E
ETYKQEKNMAINPSKENLCSTFCKEVVRNAN	αs2-casein	31	N	E
QYLYQGPIVLNPWDQVKRNAVPITPTLNREQLSTS	αs2-casein	35	S	Q
AMKPWIQP	αs2-casein	8	P	A
ESTEVFTKKTKLTEEEKNRLNFLKKISQRYQKFALPQYL	αs2-casein	39	L	E
VKITVDDKHYQKALNEINQ	αs2-casein	19	Q	V
AEVATEEVKITVDDKHYQKALNEINQFYQKFPQYLQYLYQGPIVLNPWDQVKRNAVP	αs2-casein	57	P	A
MESTEVFTKKTKLTEEEKNRLNFLKKISQRYQKFALPQYLKTVYQH	αs2-casein	46	H	M
STFCKEVVRNANEEEYSIGSSSEESAEVATEEVKITVDDKHYQKALNEINQFYQKFP	αs2-casein	57	P	S
MAINPSKEN	αs2-casein	9	N	M
NLCSTFCKEVVRNANEEEYSIGSSSEESAEVATEEVKITVDDKHYQKAL	αs2-casein	49	L	N
LNPWDQVK	αs2-casein	8	K	L
REQLSTSEENSKKTVDM	αs2-casein	17	M	R
KFPQYLQYLYQGPIVLNPWDQVKR	αs2-casein	24	R	K
DDKHYQK	αs2-casein	7	K	D
PQYLQYLYQGPIVLNPWDQVKRNAVPITP	αs2-casein	29	P	P
TYKQEKNMAINPSKENLCSTFCKEVVRNANEEEYSIGSSSEESAEVATEEVKITVDDK	αs2-casein	58	K	T
TLNREQLSTSEENSKKTVDMESTEVFTKKTKLTE	αs2-casein	34	E	T
MEHVSSSEESIISQETYKQEKNMAINPSKENLCSTFCKEVVRNANEEEYS	αs2-casein	50	S	M
FCKEVVRNANEEEYSIGSSSEESAEV	αs2-casein	26	V	F
NRLNFLKKISQRYQKFALPQYLKTVYQHQKAM	αs2-casein	32	M	N
NPWDQVKRNAVPITPTLNREQLST	αs2-casein	24	T	N
YQKFPQYLQYLYQGPIVLNPWDQVKR	αs2-casein	26	R	Y
TEVFTKKTKLTEEEKNRLNFLKKISQRYQKFA	αs2-casein	32	A	T
EKNMAINPSKENLCST	αs2-casein	16	T	E
DMESTEVFTKKTKL	αs2-casein	14	L	D
VKRNAVPITPTLNREQLSTSEENSKKTVDM	αs2-casein	30	M	V
EKNMAINPSKENLCSTFCKEVVRNANEEEYSIGSSSEESAEVATEEVKITVDDKHYQ	αs2-casein	57	Q	E
ANEEEYSIGSSSEESAEVATEEVKITVDDKHY	αs2-casein	32	Y	A
EESIISQETYKQEKNMAIN	αs2-casein	19	N	E
ENLCSTFCKEVVRNANEEEYSIGSSSEESAEVATEEVKITVDDKHYQKALNEINQF	αs2-casein	56	F	E
YKQEKNMAINPS	αs2-casein	12	S	Y
TSEENSKKTVDMESTEVFTKKTKLTEEEKNRLNFLKKISQRYQKFALPQYLKTVYQHQKA	αs2-casein	60	A	T
TYKQEKNMAINPSKENLCSTFCKEVVRNANE	αs2-casein	31	E	T
ETYKQEKNMAINPSKENLCSTFCKEVVRNANEEEYSIGSSSEESAEVATEEVKITVD	αs2-casein	57	D	E
EEVKITVDDKHYQKALNEINQFYQKFPQYLQYLYQGPIVLNPWDQVKRNA	αs2-casein	50	A	E
TLNREQLSTSEENSKKTVDMESTEVFTKKTKLTEEEKNRL	αs2-casein	40	L	T
VFTKKTKLTEEEKNRLNFLKKIS	αs2-casein	23	S	V
NTMEHVSSSEESIISQETYKQEKNMAINPSKENLCSTFCKEVVRNANEEEYSIGSSS	αs2-casein	57	S	N
YQKFPQY	αs2-casein	7	Y	Y
REQLSTSEENSKKTVDMESTEVFTKKTKLTEEEKNRLNFLKKISQRYQKF	αs2-casein	50	F	R
DKHYQKALNEINQFY	αs2-casein	15	Y	D
RNANEEEYSIGSSSEESAEVATEEVKITVD	αs2-casein	30	D	R
KFPQYLQYLYQGPIVLNPWDQVKRNAVPITPTL	αs2-casein	33	L	K
YLYQGPIVLNPWDQVKRNAVPITPT	αs2-casein	25	T	Y
FALPQYLKTVYQHQKAMKPWIQPKTKVIPYV	αs2-casein	31	V	F
WDQVKRNAVPITPTLNREQ	αs2-casein	19	Q	W
ESIISQETYKQEKNMAINPSKENLCSTF	αs2-casein	28	F	E
VDMESTEVFTKKTKLTEEEKNRLNFLKKISQRYQKFALPQYLKTVYQHQKAMKPWIQPK	αs2-casein	59	K	V
EEKNRLNFLKKISQRY	αs2-casein	16	Y	E
NTMEHVSSSEESIISQETYKQEKNMAINPSKENLCSTFCKEVVRNANE	αs2-casein	48	E	N
LYQGPIVLNPWDQVKRNAVPITPTLNREQLSTSEE	αs2-casein	35	E	L
ETYKQEKNMAINPSKENLCSTFCKEVVRNANEEEYSIGSSSEESAEVATEEVKIT	αs2-casein	55	T	E
KRNAVPITPTLN	αs2-casein	12	N	K
AVPITPTL	αs2-casein	8	L	A
DKHYQKA	αs2-casein	7	A	D
KENLCSTFCKEVVRNANEEEYSIGSSSEESAEVATEEVKITV	αs2-casein	42	V	K
QVKRNAVPITPTLNREQ	αs2-casein	17	Q	Q
LNEINQFYQKFPQYLQYLYQGPIVLNPWDQVKRNAV	αs2-casein	36	V	L
IGSSSEESAEVATEEVKITVDDKHY	αs2-casein	25	Y	I
ISQRYQKFALP	αs2-casein	11	P	I
EEEYSIGSSSEESAEVATEEV	αs2-casein	21	V	E
LQYLYQGPIVL	αs2-casein	11	L	L
EVFTKKTKLTEEEK	αs2-casein	14	K	E
LNPWDQVKRNAVPITPTLNREQLSTSEENSKKTVDMESTEVFTKKTKLTEEEKNRL	αs2-casein	56	L	L
LNPWDQVKRNAVPITPTLNREQLSTSEENSKKTVDMESTEVFTKKTKLTEE	αs2-casein	51	E	L
NPWDQVKRNAVPITP	αs2-casein	15	P	N
KNTMEHVSSSEESII	αs2-casein	15	I	K
NTMEHVSSSEESIISQETYKQEKNMAINPSKENLCSTFCKEVVRNANEEEYS	αs2-casein	52	S	N
KQEKNMAINPSKENLCSTFCKEVVRNA	αs2-casein	27	A	K
QYLQYLYQGPIVLNPWDQVKRNAVPITPTLNREQLSTSE	αs2-casein	39	E	Q
YKQEKNMAINPSKENLCSTFCKEVVRNANEEEYSI	αs2-casein	35	I	Y
EVKITVDDKHYQKALNEINQFYQKFPQYLQYLYQGPIVLNPWDQV	αs2-casein	45	V	E
IGSSSEESAEVATEEVKITVDDKHYQKALNEINQFYQKFPQYLQYLYQGPIVLNPW	αs2-casein	56	W	I
VRNANEEEYSIGSSSEESAEVATEEVKITVDDKHYQ	αs2-casein	36	Q	V
CKEVVRNANEEEYSIGSSSEESAEVATEEVKITVDDKHYQKALNEINQ	αs2-casein	48	Q	C
ALNEINQFYQKFPQYLQY	αs2-casein	18	Y	A
KITVDDKHYQKALNEINQFYQKFPQYLQYLYQGPIVLNPWDQVKR	αs2-casein	45	R	K
VLNPWDQVKRNAVPITPTLNREQLSTSEENSKKTV	αs2-casein	35	V	V
KNMAINPSKENLCSTFCKEVVRNANEEEYSIGS	αs2-casein	33	S	K
IGSSSEESAEVATEEVKITVDDKHYQKALNEINQFYQKFP	αs2-casein	40	P	I
ISQRYQKFALPQYLKTVYQHQKAMKPWIQPKTKVIPYV	αs2-casein	38	V	I
PSKENLCSTFCKEVVRNA	αs2-casein	18	A	P
KKISQRYQKFALPQYLKTVYQH	αs2-casein	22	H	K
FYQKFPQYLQYLYQGPIVLNPWDQVKRNAVPITPT	αs2-casein	35	T	F
NEINQFYQKFPQYLQYLYQGP	αs2-casein	21	P	N
VLNPWDQVKRNAVPITPTLNREQLSTSEENSK	αs2-casein	32	K	V
ESIISQETYKQEKNMAIN	αs2-casein	18	N	E
KHYQKALNEINQFYQKFPQYLQYLYQGPIVLNPWDQVKRN	αs2-casein	40	N	K
KTVYQHQKAMKPWIQ	αs2-casein	15	Q	K
INPSKENLCSTFCKEVVRNANEEEYSIGSSSEE	αs2-casein	33	E	I
ENSKKTVDMESTEVFTKKTKLTEEEKNRLNFLKKISQR	αs2-casein	38	R	E
KTVDMESTEVFTKKTKLTEEEKNRLNFLKKISQRYQKFALP	αs2-casein	41	P	K
LPQYLKTVYQ	αs2-casein	10	Q	L
EKNRLNFLKKISQRYQKFALPQYLKTVYQHQ	αs2-casein	31	Q	E
TYKQEKNMAINPSKENL	αs2-casein	17	L	T
LNPWDQVKRNAVPITP	αs2-casein	16	P	L
TFCKEVVRNANEEEYS	αs2-casein	16	S	T
PWDQVKRNAVPITPTLNREQLSTSEENSKKTV	αs2-casein	32	V	P
RNANEEEYSIGSSSEESAEVATEEVKITVDDKHY	αs2-casein	34	Y	R
AEVATEEVKITVDDKHYQKALNEINQFYQKFPQYLQYLYQGPIVLNPWDQVKRNA	αs2-casein	55	A	A
NPWDQVKRN	αs2-casein	9	N	N
YLYQGPIVLNPWDQVKRNAVPITPTLNREQLSTSEENSKKTVDMES	αs2-casein	46	S	Y
DKHYQKALNEI	αs2-casein	11	I	D
QETYKQEKNMAINPSKENLCSTF	αs2-casein	23	F	Q
ETYKQEKNMAINPSKENLCSTFCKEVVRNANEEEYSIGSSSEESA	αs2-casein	45	A	E
PWDQVKRN	αs2-casein	8	N	P
QKAMKPWIQPKT	αs2-casein	12	T	Q
TMEHVSSSEESIISQETYKQEKNMAINPSKENLCSTFCKEVVRNANEEEYSIGS	αs2-casein	54	S	T
PTLNREQLSTSEENSKKTVDMESTEVFTKKTKLTEEEKNRLNFLKKI	αs2-casein	47	I	P
EQLSTSEENSKKTVDMESTEVFTKKTKLTEEEKNRLNFLK	αs2-casein	40	K	E
FPQYLQYLYQGPIVLNPWDQVK	αs2-casein	22	K	F
PQYLQYLYQGPIVLNPWD	αs2-casein	18	D	P
KNMAINPSKENLCSTFCKEVVRNAN	αs2-casein	25	N	K
SSSEESAEVATEEVKITV	αs2-casein	18	V	S
TKLTEEEKNRLNFLKKISQRYQKFALPQYLKTVYQHQKAMKPWIQPKTKVI	αs2-casein	51	I	T
ENSKKTVDMESTEVFTKKTKLTEE	αs2-casein	24	E	E
KEVVRNANEEEYSIGSSSEES	αs2-casein	21	S	K
QEKNMAINPSKENLCSTFCKEVVRNANEEEYSIGSSSEESAEVATEEVK	αs2-casein	49	K	Q
KEVVRNANEEEYSIGSSSEESAEVATEEVK	αs2-casein	30	K	K
SKENLCSTFCKEVVRNANEEEYSIGSSSEESAEVATEEV	αs2-casein	39	V	S
PPKKNQDKTEIPTINTIA	κ-casein	18	A	P
ATLEDSPEVIESPPEINTVQVT	κ-casein	22	T	A
FSDKIAKYIP	κ-casein	10	P	F
IASGEPTSTPTTEAVESTVATL	κ-casein	22	L	I
AIPPKKNQDKTEIPTINT	κ-casein	18	T	A
MAIPPKKNQDKTEIPTINT	κ-casein	19	T	M
LINNQFLPYPYY	κ-casein	12	Y	L
FSDKIAKYIPIQY	κ-casein	13	Y	F
FMAIPPKKNQDKTEIPTINT	κ-casein	20	T	F
INNQFLPYPYY	κ-casein	11	Y	I
LINNQFLPYPYYAKPAA	κ-casein	17	A	L
IASGEPTSTPT	κ-casein	11	T	I
INNQFLPYPYYAKPAA	κ-casein	16	A	I
IASGEPTSTPTTEAVEST	κ-casein	18	T	I
IASGEPTSTPTTEAVESTVA	κ-casein	20	A	I
PYYAKPAAVRSPA	κ-casein	13	A	P
IPTINTIASGEPTS	κ-casein	14	S	I
IASGEPTSTPTTEAVESTVAT	κ-casein	21	T	I
KDERFFSDKIAKYIPIQYVLSRYPSYGLNY	κ-casein	30	Y	K
DKTEIPTINTIA	κ-casein	12	A	D
HPHPHLSFMAIPPKKNQDKTEIPTIN	κ-casein	26	N	H
EIPTINTIASGEPTSTPTTEAV	κ-casein	22	V	E
VLSRYPSYG	κ-casein	9	G	V
LNYYQQKP	κ-casein	8	P	L
IPIQYVLSRYPSYGLNYYQQKPV	κ-casein	23	V	I
VESTVATLEDSPEVIESPPEINT	κ-casein	23	T	V
INNQFLPYPYYAKPAAVRSPAQILQWQVLSNTVPAKSC	κ-casein	38	C	I
DSPEVIESPPEINTVQV	κ-casein	17	V	D
YYQQKPVALINNQFLPYPYYAKPAAVRS	κ-casein	28	S	Y
EDSPEVIESPPEINTVQV	κ-casein	18	V	E
FLPYPYY	κ-casein	7	Y	F
DKIAKYIPIQYVLSRYPSYGLNYY	κ-casein	24	Y	D
AVESTVATLEDSPEVIESPPEINTVQV	κ-casein	27	V	A
PTSTPTTEAVESTVATLEDSPEVIESPPEINT	κ-casein	32	T	P
SFMAIPPKKNQDKTEIPTINTIASG	κ-casein	25	G	S
LQWQVLSN	κ-casein	8	N	L
INNQFLPYPYYAKP	κ-casein	14	P	I
AKPAAVRSPAQILQWQVLSNTVPAKSCQAQPT	κ-casein	32	T	A
KKNQDKTEIPTINTIASG	κ-casein	18	G	K
PTTEAVESTVATLEDSPEVIESPPEI	κ-casein	26	I	P
SRYPSYG	κ-casein	7	G	S
MARHPHPH	κ-casein	8	H	M
SDKIAKYIP	κ-casein	9	P	S
YAKPAAVRSPAQILQWQVLSNTVPAKSCQAQPTTMARHPHPHLS	κ-casein	44	S	Y
IAKYIPIQY	κ-casein	9	Y	I
SDKIAKYIPIQYVLSRYPSYGLNYYQQKPVA	κ-casein	31	A	S
LNYYQQKPVALINNQFLPYPYYA	κ-casein	23	A	L
SPAQILQWQVLS	κ-casein	12	S	S
AKPAAVRSPAQILQWQVLSNTVPAKSCQAQPTTMARHPHPHLSFMAI	κ-casein	47	I	A
LINNQFLPYPYYAKPAAVRSPAQILQWQV	κ-casein	29	V	L
LQWQVLSNTVPAKSCQAQPTTMARHPHPHLSFMAIPP	κ-casein	37	P	L
NQDKTEIPTINTI	κ-casein	13	I	N
AIPPKKNQDKTEIPTINTIASGEPTSTPTTEAVESTVAT	κ-casein	39	T	A
FSDKIAKYIPIQYVLSRYPSYGL	κ-casein	23	L	F
EPTSTPTTEAVESTVATLEDSPEVIESPPEINTVQVTST	κ-casein	39	T	E
YAKPAAVRSPAQILQWQVLSNTVPAKSCQAQPTTMAR	κ-casein	37	R	Y
AKPAAVRSPAQILQWQVLSNTVPAKSCQAQPTTMARHPHPHL	κ-casein	42	L	A
GLNYYQQKPVALINNQFLPYPYYAKPAAVRSPAQILQ	κ-casein	37	Q	G
PVALINNQFLPYPYYAKPAAVRSPAQILQWQVLSNT	κ-casein	36	T	P
ASGEPTSTPTTEAVES	κ-casein	16	S	A
HPHLSFMAIPPKKNQDKTEIPTINTIASGEPTST	κ-casein	34	T	H
SRYPSYGLNYYQQKPVALINNQFLPYPYYAKPAAVRSPAQILQWQVLSNT	κ-casein	50	T	S
TIASGEPTSTPTTEAVESTVATLEDSPEVIESPPEINTVQV	κ-casein	41	V	T
NQEQPIRCEKDERFFSDKI	κ-casein	19	I	N
AVESTVATLEDSPEVIESPPEI	κ-casein	22	I	A
MAIPPKKNQDKTEIPT	κ-casein	16	T	M
DSPEVIESPPEINTVQVT	κ-casein	18	T	D
YVLSRYPSYGLNYYQQKPVALINNQFL	κ-casein	27	L	Y
AKSCQAQPTTMARHPHPHLSFMAIPPKKNQDKTEIPTINTIA	κ-casein	42	A	A
AKSCQAQPTTMARHPHPHLSFMAIPPKKNQDKTEIPTINTIASGEPTST	κ-casein	49	T	A
IPTINTIASGEPTSTP	κ-casein	16	P	I
LINNQFLPYPYYAKPAAVRSPAQILQWQVLSNTVPAKSCQAQPTTMARHPHPHLSFM	κ-casein	57	M	L
YYQQKPVALINNQFLPYPYYAKPAAVRSPAQILQWQVLSNTVPA	κ-casein	44	A	Y
FFSDKIAKYIPIQYVLSRYPSYGLNYYQQKPVA	κ-casein	33	A	F
PYPYYAKPAAVRSPAQILQWQVLSNT	κ-casein	26	T	P
YYQQKPVALINNQFLPYPYYAKPAAVRSP	κ-casein	29	P	Y
NNQFLPYPYYAKPAAVRSPAQILQWQVLSNTVPA	κ-casein	34	A	N
EVIESPPEINT	κ-casein	11	T	E
INNQFLPYPYYAKPAAVRSPAQILQWQVLSNTVPAKSCQAQPTTMARHPHPHLSFMAIPP	κ-casein	60	P	I
LSRYPSYG	κ-casein	8	G	L
EAVESTVATLEDSPEVIE	κ-casein	18	E	E
KDERFFSDKIAKYIPIQYVLSRY	κ-casein	23	Y	K
YQQKPVALINNQFLPYPYYAKPAAVRSPAQILQW	κ-casein	34	W	Y
FLPYPYYAKPAAVRSPAQILQWQVL	κ-casein	25	L	F
KIAKYIPIQYVLSRYPSYGLNYY	κ-casein	23	Y	K
TEIPTINTIASGEPTSTPT	κ-casein	19	T	T
STVATLEDSPEVIESPPEINTV	κ-casein	22	V	S
KTEIPTINTIASGEPTSTPTTEAVESTVA	κ-casein	29	A	K
IASGEPTSTPTTEAVESTVATLEDSPEVIESPPEIN	κ-casein	36	N	I
TPTTEAVESTVATLEDSPEVIESPPEINTVQVTSTAV	κ-casein	37	V	T
VIESPPEINTVQVTSTAV	κ-casein	18	V	V
IPPKKNQDKTEIPTINTIASGEPTST	κ-casein	26	T	I
ILQWQVLSNTVPAKSCQAQPTTMARHPHPHLSFMAIPPKKNQDKTEIPTINTIASGEPT	κ-casein	59	T	I
FLPYPYYAKPAAVRSPAQILQWQ	κ-casein	23	Q	F
CEKDERFFSDKIAKYIPIQYV	κ-casein	21	V	C
NQFLPYPYYAKPAAVRSPAQILQWQVLSNTVPAKSC	κ-casein	36	C	N
SYGLNYYQQKPVALINNQFLPYPY	κ-casein	24	Y	S
AQILQWQVLSNTVPAKSCQAQPTTMARHPHPHLSFMAIPPKKNQD	κ-casein	45	D	A
AQILQWQVLSNTVPAKSCQA	κ-casein	20	A	A
TINTIASGEPTSTPTTEAVESTVATLEDSPEVIESPPEINTVQVTS	κ-casein	46	S	T
ARHPHPHLSFMAIPPKKNQDKTEIPTINT	κ-casein	29	T	A
KSCQAQPTTMARHPHPHLSFMAIPPKKNQDK	κ-casein	31	K	K
PYPYYAKP	κ-casein	8	P	P
PVALINNQFLPYPYYAKPAAVRSPAQILQWQVLSNTVPAKSCQAQPTT	κ-casein	48	T	P
PEVIESPPEINTVQVTST	κ-casein	18	T	P
INTIASGEPTSTPTTEAVESTVATLEDSPEVIESPPEIN	κ-casein	39	N	I
INTIASGEPTSTPTTEAVESTVA	κ-casein	23	A	I
KNQDKTEIPTINTIASGEPTSTPTTEAVESTVATLEDSP	κ-casein	39	P	K
EQPIRCEKDERFFSDKIAKYIPIQYVLSRYPSYGLNYYQQKPVALIN	κ-casein	47	N	E
SCQAQPTTMARHPHPHLSFMAIPPKKNQDKTEIPTINTIAS	κ-casein	41	S	S
HPHLSFMAIPPKKNQDKTEIPTINTIAS	κ-casein	28	S	H
AQPTTMARHPHPHLSFMAIPPKKNQDKTEIPTI	κ-casein	33	I	A
SFMAIPPKKNQDKTEIPTINTIASGEPTSTPTTEAVESTVATLEDSPEVIESPPEINTV	κ-casein	59	V	S
NYYQQKP	κ-casein	7	P	N
QQKPVALINNQFLPYPYYAKPAAVRSPAQILQ	κ-casein	32	Q	Q
EKDERFFSDKIAKYIPIQYVLSRYPSYGLNYYQQKPVALINNQFLPYPYYAKPAAVRSP	κ-casein	59	P	E
PHLSFMAIPPKKN	κ-casein	13	N	P
ESTVATLEDSPEVIESPPEINTV	κ-casein	23	V	E
QKPVALINNQFLPYPYYAKPAAVRSPAQI	κ-casein	29	I	Q
VPAKSCQAQPTTMARH	κ-casein	16	H	V
SPEVIESPPEINTVQVTS	κ-casein	18	S	S
TEIPTINTIAS	κ-casein	11	S	T
PPKKNQDKTEIPTINT	κ-casein	16	T	P
PTINTIASGEPTSTPTTEAVESTVATLEDSPE	κ-casein	32	E	P
LSNTVPAKSCQAQPTTMARHP	κ-casein	21	P	L
VRSPAQILQWQVLSNTV	κ-casein	17	V	V
QEQNQEQPIRCEKDERFFSDKIAKYIPIQYVLSRYPSYGLNYYQQKPVALINNQFLP	κ-casein	57	P	Q
QFLPYPYYAKPAAVRSPAQILQWQVLSNTVPAKSCQ	κ-casein	36	Q	Q
NYYQQKPVALINNQFLPYPYYAKPAAVRSPAQILQWQVLS	κ-casein	40	S	N
NQDKTEIPTINT	κ-casein	12	T	N
QYVLSRYPSYGLNYYQQKPVALINNQFLPYPYYAKPAAVRSPAQILQWQVL	κ-casein	51	L	Q
TSTPTTEAVESTVATLEDSPEVIESPPEINTVQV	κ-casein	34	V	T
QKPVALINNQFLPYPYYAKPAAVRSPAQILQWQVLSNT	κ-casein	38	T	Q
ASGEPTSTPTTEAVESTVATL	κ-casein	21	L	A
ASGEPTSTPTTEAVESTVATLEDSPEVIESPPEINTVQVTSTA	κ-casein	43	A	A
RFFSDKIAKYIPIQYVLSRYPSYGLNYYQQKPVAL	κ-casein	35	L	R
AKSCQAQPTTMARHPHPHLS	κ-casein	20	S	A
NQFLPYPYYAKPAAVRSPAQILQWQVLSNTVPAKSCQAQPTTMARHPHPHLSFMAIPP	κ-casein	58	P	N
AKSCQAQPTTMAR	κ-casein	13	R	A
PVALINNQFLPYPYYAKPAAVRSPAQILQWQV	κ-casein	32	V	P
IPTINTIASGEPTSTPTTE	κ-casein	19	E	I
PIQYVLSRYPSYGLNYYQQKPVA	κ-casein	23	A	P
SPAQILQWQVLSNTVPAKSC	κ-casein	20	C	S
VALINNQFLPYPYYAKPAAVRSPAQILQWQVLSNTVPAKSCQAQPTTMARHPH	κ-casein	53	H	V
TEIPTINTIASGEPTSTPTT	κ-casein	20	T	T
HLSFMAIPPKKNQDKTEIPTINTIASGEPTSTPTTEA	κ-casein	37	A	H

## Sheet: CPP K
CPP K	Protein	Peptide length	Amino acid at C-terminal	Amino acid at N-terminal
MHQPHQPLPPTVMFPPQSV	β-casein	19	V	M
TLTDVENLHLPLPL	β-casein	14	L	T
DVENLHLPLPL	β-casein	11	L	D
SLPQNIPPLTQTPVVVPPFLQPEV	β-casein	24	V	S
SLPQNIPPLTQTPVVVPPFLQPEVM	β-casein	25	M	S
WMHQPHQPLPPTVMFPPQ	β-casein	18	Q	W
TESQSLTLTDVENLHLPLPL	β-casein	20	L	T
TDVENLHLPLPL	β-casein	12	L	T
LLYQEPVLGPVR	β-casein	12	R	L
SLTLTDVENLHLPLPL	β-casein	16	L	S
NIPPLTQTPVVVPPFLQPEV	β-casein	20	V	N
LLYQEPVLGPV	β-casein	11	V	L
AQTQSLVYPFPGPIPN	β-casein	16	N	A
NIPPLTQTPVVVPPFLQPEVM	β-casein	21	M	N
LTDVENLHLPLPL	β-casein	13	L	L
LYQEPVLGPVR	β-casein	11	R	L
VYPFPGPIPN	β-casein	10	N	V
SLVYPFPGPIPN	β-casein	12	N	S
LYQEPVLGPV	β-casein	10	V	L
LLYQEPVLGPVRGPFPIIV	β-casein	19	V	L
SLPQNIPPLTQTPVVVPPFLQPEVMGV	β-casein	27	V	S
YQEPVLGPVR	β-casein	10	R	Y
TLTDVENLHLPLP	β-casein	13	P	T
FLLYQEPVLGPVR	β-casein	13	R	F
HQPHQPLPPTVMFPPQSV	β-casein	18	V	H
VVPPFLQPEV	β-casein	10	V	V
LYQEPVLGPVRGPFPIIV	β-casein	18	V	L
KKIEKFQSEE	β-casein	10	E	K
AQTQSLVYPFPGPI	β-casein	14	I	A
QEPVLGPVRGPFPIIV	β-casein	16	V	Q
DVENLHLPLP	β-casein	10	P	D
VVPPFLQPEVM	β-casein	11	M	V
TESQSLTLTDVENL	β-casein	14	L	T
SLVYPFPGPI	β-casein	10	I	S
FQSEEQQQTEDELQDKIHP	β-casein	19	P	F
SLPQNIPPLTQTPVVVPPFLQPE	β-casein	23	E	S
FLLYQEPVLGPVRGPFPIIV	β-casein	20	V	F
TESQSLTLTDVENLHLPLP	β-casein	19	P	T
TEDELQDKIHPF	β-casein	12	F	T
PPLTQTPVVVPPFLQPEV	β-casein	18	V	P
FQSEEQQQTEDELQDK	β-casein	16	K	F
AQTQSLVYPFPGPIPNSLPQ	β-casein	20	Q	A
MHQPHQPLPPTVMFPPQS	β-casein	18	S	M
YQEPVLGPVRGPFPIIV	β-casein	17	V	Y
SLPQNIPPLTQTPVVVPPFLQPEVMG	β-casein	26	G	S
PPLTQTPVVVPPFLQPEVM	β-casein	19	M	P
NIPPLTQTPVVVPPFLQPEVMGV	β-casein	23	V	N
LLYQEPVLGPVRGPFPI	β-casein	17	I	L
SLTLTDVENLHLPLP	β-casein	15	P	S
DMPIQAFLLYQEPV	β-casein	14	V	D
RELEELNVPGEIVE	β-casein	14	E	R
LTLTDVENLHLPLPL	β-casein	15	L	L
MHQPHQPLPPTVMFPPQSVL	β-casein	20	L	M
TDVENLHLPLP	β-casein	11	P	T
SLVYPFPGPIPNSLPQ	β-casein	16	Q	S
VYPFPGPIPNSLPQ	β-casein	14	Q	V
RELEELNVPGEI	β-casein	12	I	R
AQTQSLVYPFPGPIPNSLPQNIPPLTQTPV	β-casein	30	V	A
PLLQSWMHQPHQPLPPT	β-casein	17	T	P
LQSWMHQPHQPLPPTVMFPP	β-casein	20	P	L
AVPYPQRDMPIQAFLLYQ	β-casein	18	Q	A
FLQPEVMGVSKVKEAMAPK	β-casein	19	K	F
MHQPHQPLPPTVMFPPQSVLS	β-casein	21	S	M
YPVEPFTESQSL	β-casein	12	L	Y
NIPPLTQTPVVVPPFLQPEVMGVS	β-casein	24	S	N
FLLYQEPVLGPV	β-casein	12	V	F
VYPFPGPIPNSLPQNIPPLTQTPV	β-casein	24	V	V
VPGEIVESLSSSEESITRINKK	β-casein	22	K	V
QEPVLGPVRGPFPI	β-casein	14	I	Q
YQEPVLGPVRGPFPI	β-casein	15	I	Y
NSLPQNIPPLTQT	β-casein	13	T	N
TQTPVVVPPFLQPEVM	β-casein	16	M	T
DVENLHLPLPLLQSW	β-casein	15	W	D
QDKIHPFAQTQSLVYPF	β-casein	17	F	Q
DVENLHLPLPLL	β-casein	12	L	D
EELNVPGEIVESLSSSEESITRINKKI	β-casein	27	I	E
TQTPVVVPPFLQPEV	β-casein	15	V	T
IPNSLPQNIPPLTQTPVVVPPF	β-casein	22	F	I
SLVYPFPGPIPNSLPQNIPPLTQTPV	β-casein	26	V	S
PIQAFLLYQEPVLG	β-casein	14	G	P
SLSQSKVLPVPQKAVPYPQRDMPIQ	β-casein	25	Q	S
NIPPLTQTPVVVPPFLQPE	β-casein	19	E	N
TQSLVYPFPGPIPNSLPQNIPP	β-casein	22	P	T
TLTDVENLHLPLPLLQS	β-casein	17	S	T
AFLLYQEPVLG	β-casein	11	G	A
LTDVENLHLPLP	β-casein	12	P	L
TDVENLHLPLPLLQSWMHQP	β-casein	20	P	T
KEMPFPKYPVEPFTESQSLTLTDV	β-casein	24	V	K
PGEIVESLSSSEESITRI	β-casein	18	I	P
PNSLPQNIPPLTQTPVVVPPFLQPEV	β-casein	26	V	P
VVPPFLQPEVMGV	β-casein	13	V	V
FPGPIPNSLPQNIPPLTQTPVVVPPF	β-casein	26	F	F
YPFPGPIPNSLPQNIPPLTQTPVVVPP	β-casein	27	P	Y
LTLTDVENLHLPLP	β-casein	14	P	L
PPTVMFPPQSV	β-casein	11	V	P
RDMPIQAFLLYQEP	β-casein	14	P	R
VVVPPFLQPEVMGVSK	β-casein	16	K	V
TQSLVYPFPGPIPN	β-casein	14	N	T
PLPLLQSWMHQP	β-casein	12	P	P
HQPHQPLPPTVMFPPQS	β-casein	17	S	H
QPHQPLPPTVMFPPQ	β-casein	15	Q	Q
LSLSQSKVLPVPQKAVPYPQRDM	β-casein	23	M	L
QQQTEDELQDKIHPFAQTQSLVYPFPG	β-casein	27	G	Q
TEDELQDKIHPFAQTQSLVYP	β-casein	21	P	T
ELEELNVPGEIVESL	β-casein	15	L	E
AQTQSLVYPF	β-casein	10	F	A
TLTDVENLHLPLPLLQSWMH	β-casein	20	H	T
QSLTLTDVENLHLPLPLLQSWM	β-casein	22	M	Q
VMGVSKVKEAMAPKHKE	β-casein	17	E	V
IQAFLLYQEPVLGP	β-casein	14	P	I
ELEELNVPGEIVES	β-casein	14	S	E
TDVENLHLPLPLL	β-casein	13	L	T
HKEMPFPKYPVEPFTESQ	β-casein	18	Q	H
LTQTPVVVPPFLQPEV	β-casein	16	V	L
SLSSSEESITRINK	β-casein	14	K	S
QSLVYPFPGPIPN	β-casein	13	N	Q
WMHQPHQPLPPTVMFPPQS	β-casein	19	S	W
WMHQPHQPLPPTVMFPPQSV	β-casein	20	V	W
AQTQSLVYPFPGPIPNSL	β-casein	18	L	A
ELNVPGEIVE	β-casein	10	E	E
PQRDMPIQAFLLYQEPVL	β-casein	18	L	P
SLTLTDVENLHL	β-casein	12	L	S
WMHQPHQPLPPTVMFPPQSVLSL	β-casein	23	L	W
TLTDVENLHLPL	β-casein	12	L	T
RDMPIQAFLLYQEPVLGPVR	β-casein	20	R	R
QDKIHPFAQTQSLVYPFPGPIPNSLPQNI	β-casein	29	I	Q
PNSLPQNIPPLTQTPVVVPPFLQPEVMG	β-casein	28	G	P
SWMHQPHQPLPPTVMFPPQSV	β-casein	21	V	S
TQSLVYPFPGPI	β-casein	12	I	T
KIHPFAQTQSLVYPFPGPIPNSLPQNIPP	β-casein	29	P	K
VVVPPFLQPEVMGVSKVKEAMAPKHKEM	β-casein	28	M	V
FAQTQSLVYPFPGPIPN	β-casein	17	N	F
RELEELNVPGEIVESLSSSEESITRI	β-casein	26	I	R
EPFTESQSLTL	β-casein	11	L	E
YPVEPFTESQSLT	β-casein	13	T	Y
PQRDMPIQAF	β-casein	10	F	P
QDKIHPFAQTQSLVYPFPG	β-casein	19	G	Q
TLTDVENLHLPLPLLQSWM	β-casein	19	M	T
TQTPVVVPPFLQPEVMGVSKVKEAMAP	β-casein	27	P	T
PPLTQTPVVVPPFLQPEVMGVS	β-casein	22	S	P
PPFLQPEVMGVSKV	β-casein	14	V	P
PKHKEMPFPKYPVEPFTESQ	β-casein	20	Q	P
TQSLVYPFPGPIPNSLPQNIPPLT	β-casein	24	T	T
PIQAFLLYQEPVLGPVR	β-casein	17	R	P
FLLYQEPVLGPVRGPFPI	β-casein	18	I	F
KEAMAPKHKEMPFPKYPVEPFTES	β-casein	24	S	K
VYPFPGPIPNSLPQNIPPLTQT	β-casein	22	T	V
KEMPFPKYPVEPFTESQSLTLTD	β-casein	23	D	K
LLYQEPVLGPVRGPF	β-casein	15	F	L
QPEVMGVSKVKEAMAP	β-casein	16	P	Q
LTLTDVENLHLPLPLLQSWM	β-casein	20	M	L
MPIQAFLLYQEPVLGP	β-casein	16	P	M
PPLTQTPVVVPPFLQPEVMG	β-casein	20	G	P
QQTEDELQDK	β-casein	10	K	Q
ESQSLTLTDVENLHLPLPL	β-casein	19	L	E
PTVMFPPQSVL	β-casein	11	L	P
GPFPIIV	β-casein	7	V	G
VYPFPGPIPNSLPQNIPPLTQTPVVVPPFLQPEV	β-casein	34	V	V
HKEMPFPK	β-casein	8	K	H
PLTQTPVVVPPFLQPEVMGVSKVKEAMA	β-casein	28	A	P
SLVYPFPGPIPNSLPQNIPPLTQTPVVVPPFLQPEVM	β-casein	37	M	S
LTQTPVV	β-casein	7	V	L
PFPGPIPNSLPQNIPPLTQTPVVVPPFLQPEVMGVSK	β-casein	37	K	P
TLTDVENL	β-casein	8	L	T
VENLHLPLP	β-casein	9	P	V
YQEPVLGPV	β-casein	9	V	Y
DMPIQAF	β-casein	7	F	D
QEPVLGPV	β-casein	8	V	Q
QEPVLGPVR	β-casein	9	R	Q
VPGEIVESLSSSEESITRINKKIEKFQSEEQQQTED	β-casein	36	D	V
DKIHPFAQTQSLVYPFPGPIPNSLPQNIPPLTQTPVVVPPFLQP	β-casein	44	P	D
VKEAMAPK	β-casein	8	K	V
VYPFPGPI	β-casein	8	I	V
LTLTDVE	β-casein	7	E	L
VYPFPGPIPNSLPQNIPPLTQTPVVVPPFLQPEVMGV	β-casein	37	V	V
LTQTPVVVPPFLQPEVMGV	β-casein	19	V	L
VLPVPQK	β-casein	7	K	V
RGPFPIIV	β-casein	8	V	R
SVLSLSQSKVLPVPQKAVPYPQRDMPIQAFLLYQEPVLGP	β-casein	40	P	S
AQTQSLVYPFPGPIPNSLPQNIPPLTQTPVVVPPFLQPEVMGVS	β-casein	44	S	A
TESQSLT	β-casein	7	T	T
QNIPPLTQTPVVVPPFLQPEV	β-casein	21	V	Q
QPHQPLPPTVMFPPQSVLSLSQSKVLPVP	β-casein	29	P	Q
ESQSLTLTDVEN	β-casein	12	N	E
QSLTLTDVENLHLPLPL	β-casein	17	L	Q
TQSLVYPFPGPIPNSLPQNIPPLTQTPVVVPPFLQPEVM	β-casein	39	M	T
PVLGPVR	β-casein	7	R	P
PPLTQTPV	β-casein	8	V	P
TEDELQDKIHP	β-casein	11	P	T
KYPVEPFTESQSL	β-casein	13	L	K
PFPGPIPNSLPQNIPP	β-casein	16	P	P
TLTDVEN	β-casein	7	N	T
QTEDELQDKIH	β-casein	11	H	Q
TESQSLTLTDVE	β-casein	12	E	T
SLTLTDVENLHLPLPLLQ	β-casein	18	Q	S
PQRDMPIQ	β-casein	8	Q	P
TEDELQDK	β-casein	8	K	T
LQDKIHPFAQTQ	β-casein	12	Q	L
SLPQNIPPLTQTPVVV	β-casein	16	V	S
AVPYPQR	β-casein	7	R	A
PVPQKAVPYPQRDMPIQ	β-casein	17	Q	P
HQPLPPTVMFPPQS	β-casein	14	S	H
FPGPIPNSLPQN	β-casein	12	N	F
FPKYPVEPFTESQSL	β-casein	15	L	F
LPLPLLQSWMH	β-casein	11	H	L
PFTESQSLTLTDVENLHLPLPLLQSWMHQPHQPLPPTVMF	β-casein	40	F	P
SLTLTDVENLH	β-casein	11	H	S
QSLVYPFPGPIPNS	β-casein	14	S	Q
VMFPPQSVLSLSQSKVLPVPQKAVPYPQRDMPIQ	β-casein	34	Q	V
FPPQSVLSLSQSKVLPVP	β-casein	18	P	F
LPLLQSWMHQPHQPLPPTVMFPPQSVLSLSQSKVLP	β-casein	36	P	L
ENLHLPLPL	β-casein	9	L	E
QPEVMGVSKVKEAMAPKHKEMPFPKYPVEPFTE	β-casein	33	E	Q
KAVPYPQ	β-casein	7	Q	K
FPGPIPNSLPQNIPPLTQTPV	β-casein	21	V	F
LYQEPVLGPVRGPFPI	β-casein	16	I	L
LTLTDVENLHLPLPLLQSW	β-casein	19	W	L
SSSEESITRIN	β-casein	11	N	S
SLVYPFPGPIPNS	β-casein	13	S	S
PFAQTQSLV	β-casein	9	V	P
LVYPFPGPIPNSLPQNIPPLTQTPVVVPPFLQPEVM	β-casein	36	M	L
VENLHLP	β-casein	7	P	V
QNIPPLTQTPVVVPPFLQPEVM	β-casein	22	M	Q
DKIHPFAQTQSLVYP	β-casein	15	P	D
HQPLPPTVMFPP	β-casein	12	P	H
LQSWMHQPHQPLPPT	β-casein	15	T	L
FLQPEVMGVSKVKEA	β-casein	15	A	F
QRDMPIQAFLLYQEPVLG	β-casein	18	G	Q
RELEELNVPGEIVESL	β-casein	16	L	R
SKVKEAMAPKHKEMP	β-casein	15	P	S
EMPFPKYPVEPFTESQSLTLTDVENLHLPLPLLQSW	β-casein	36	W	E
DELQDKIHPFAQTQSLVYPFPGPIP	β-casein	25	P	D
FPPQSVL	β-casein	7	L	F
QSLVYPFPGPIPNSLPQNIPPLTQTPV	β-casein	27	V	Q
QTQSLVY	β-casein	7	Y	Q
SLVYPFPGPIPNSLPQNIPPLTQTPVVVPPFLQPE	β-casein	35	E	S
ENLHLPLPLLQSWMHQPHQPLPPT	β-casein	24	T	E
QKAVPYPQRDMPIQAFLLYQEPVLGPVR	β-casein	28	R	Q
QQQTEDELQDKIHPF	β-casein	15	F	Q
QPLPPTVMFPPQSVLS	β-casein	16	S	Q
TLTDVENLHLPLPLLQ	β-casein	16	Q	T
TLTDVENLHLPLPLLQSWMHQPHQPLPPTVMF	β-casein	32	F	T
SWMHQPHQPLPPTVMFPPQS	β-casein	20	S	S
AQTQSLVYPFPGPIPNSLPQNIPPLTQTPVVVPPFLQPEVMGV	β-casein	43	V	A
PFPGPIPN	β-casein	8	N	P
FLLYQEPV	β-casein	8	V	F
LPQNIPPLTQTP	β-casein	12	P	L
YPFPGPIPNSLPQN	β-casein	14	N	Y
EESITRINKKIEKFQSEEQQQTEDELQDK	β-casein	29	K	E
LEELNVPGEIVESLSSSEESITRINKKIEKFQSEE	β-casein	35	E	L
FLQPEVM	β-casein	7	M	F
PKYPVEPFTESQSLTLTDVE	β-casein	20	E	P
PLLQSWMHQPHQPLPPTVM	β-casein	19	M	P
PFLQPEVMGVSKVKEAMAPKHKE	β-casein	23	E	P
QSEEQQQTEDELQDKIHPFAQTQSLVYPFPG	β-casein	31	G	Q
TDVENLHLPLPLLQSWM	β-casein	17	M	T
VYPFPGPIPNSLPQNIPPLTQTPVVVPPFLQPE	β-casein	33	E	V
FAQTQSLVYPFPG	β-casein	13	G	F
IVESLSSSEESITRINKKIEKFQSEEQQQTEDELQD	β-casein	36	D	I
PYPQRDMPIQAFL	β-casein	13	L	P
SLTLTDVEN	β-casein	9	N	S
QTQSLVYPFPGPIPNS	β-casein	16	S	Q
SSSEESITRINKKIEKFQSEEQQ	β-casein	23	Q	S
LVYPFPGPIPNSLP	β-casein	14	P	L
TEDELQDKIHPFAQTQSLVY	β-casein	20	Y	T
YPFPGPIPNSLPQNIPPLTQTPVVVPPFLQPEVM	β-casein	34	M	Y
PIQAFLLYQE	β-casein	10	E	P
FPGPIPNSLPQNIPPLTQ	β-casein	18	Q	F
SQSLTLTDVENLHLPLP	β-casein	17	P	S
PGPIPNSLPQN	β-casein	11	N	P
PGEIVESLSSSEE	β-casein	13	E	P
GPIPNSLPQNIPPL	β-casein	14	L	G
MFPPQSVLSLS	β-casein	11	S	M
PQNIPPLTQT	β-casein	10	T	P
QKAVPYPQRDMPIQAFLLYQEPVLGPVRGPFPIIV	β-casein	35	V	Q
TQTPVVVPPFLQPEVMGVSKVKEAMAPKHKEMPF	β-casein	34	F	T
KIHPFAQTQSLVYPFPG	β-casein	17	G	K
VYPFPGPIPNSLPQNIPPLTQTPVVVPPFL	β-casein	30	L	V
LQSWMHQPHQPLPPTVMFP	β-casein	19	P	L
PLPPTVMFPPQSV	β-casein	13	V	P
VMFPPQSVLS	β-casein	10	S	V
PTVMFPPQSVLSLSQSKV	β-casein	18	V	P
PLTQTPVVVPPFLQPEVMGVSKVKEAMAPKHKEMPFPKYPVEPFT	β-casein	45	T	P
HQPHQPLPPTVMFPPQSVL	β-casein	19	L	H
YPQRDMPIQAFLLYQEPVL	β-casein	19	L	Y
NLHLPLPL	β-casein	8	L	N
TESQSLTLTDVENLHLPLPLL	β-casein	21	L	T
RDMPIQAFLLYQEPVLG	β-casein	17	G	R
LNVPGEIVESLSSSEESIT	β-casein	19	T	L
PQKAVPYPQRDMPIQAFLLYQEPVLGPVRGPFP	β-casein	33	P	P
PPFLQPEVM	β-casein	9	M	P
ELNVPGEIVESLSSSEESITRIN	β-casein	23	N	E
AQTQSLVYPFPGPIPNS	β-casein	17	S	A
SSEESITRINKKIEKFQSEEQQQTEDELQDK	β-casein	31	K	S
DELQDKIHPF	β-casein	10	F	D
PLLQSWMHQPHQPLPPTVMF	β-casein	20	F	P
YPFPGPIPNSLPQNIPP	β-casein	17	P	Y
GEIVESLSSSEESITRINKKIEK	β-casein	23	K	G
KKIEKFQSEEQQQTED	β-casein	16	D	K
PFLQPEVM	β-casein	8	M	P
LPLPLLQSWMHQPHQPLPPT	β-casein	20	T	L
YPQRDMPIQAFLL	β-casein	13	L	Y
LPLLQSWMHQPHQPLP	β-casein	16	P	L
QTQSLVYPFPGPIPNSLPQNIPPLTQTPVVVPPFLQPEVMGVS	β-casein	43	S	Q
FPGPIPNSLPQNIPPLTQTPVVVPPFLQPEVMGVSKVKE	β-casein	39	E	F
PIPNSLPQNIPPLTQTPVVVPPFLQPEVMGVSKV	β-casein	34	V	P
LPPTVMFPPQSVLSLSQSKVLPVPQKAVPYP	β-casein	31	P	L
LTQTPVVVPPFLQPEVMGVS	β-casein	20	S	L
FLQPEVMGVSKVKEAMAPKHKEMP	β-casein	24	P	F
PGEIVESLSSSEESITRINKKIEKFQS	β-casein	27	S	P
PKYPVEPFTESQSLTLTDVENLHLPL	β-casein	26	L	P
PFAQTQSLVYPFPGPIPNSLPQNIPPLTQTPVVVPPFLQPEV	β-casein	42	V	P
QDKIHPFAQTQSL	β-casein	13	L	Q
TLTDVENLHLPLPLLQSWMHQPHQPLPPTVMFPPQSVLSLSQSKVL	β-casein	46	L	T
TQSLVYPFPGPIPNSLPQ	β-casein	18	Q	T
SQSLTLTDVENLHLPLPLLQSWMHQ	β-casein	25	Q	S
LQDKIHPFAQT	β-casein	11	T	L
VPYPQRDMP	β-casein	9	P	V
GVSKVKEAMAPKHKEMPFPK	β-casein	20	K	G
LVYPFPGP	β-casein	8	P	L
VKEAMAPKHKEMP	β-casein	13	P	V
SLSQSKVLPVPQKAVPYPQRDMPIQAFLLYQEPVLGPVR	β-casein	39	R	S
FTESQSLTLTDVENLHLP	β-casein	18	P	F
TLTDVENLHLPLPLLQSWMHQPHQPLPPTVMFPPQSVLSL	β-casein	40	L	T
VVVPPFLQPEVMGVSKV	β-casein	17	V	V
ENLHLPLPLLQSWMHQPHQPLPPTVMFPPQSVLSLSQSKVL	β-casein	41	L	E
LSLSQSKVLPVPQKAVPYPQRDMPIQAFLLYQEPVLGPVRGP	β-casein	42	P	L
QPLPPTVMFPPQSVLSLS	β-casein	18	S	Q
TDVENLHLPLPLLQSWMHQPHQPL	β-casein	24	L	T
TDVENLHLPLPLLQSWMHQPHQPLPPTVMFPPQSVLSLSQ	β-casein	40	Q	T
KFQSEEQQQTEDELQDKIHP	β-casein	20	P	K
ELQDKIHPFAQTQS	β-casein	14	S	E
SLPQNIPPLTQTPVVVPPFLQPEVMGVSKVKEAMAPKHKEMP	β-casein	42	P	S
LQSWMHQPHQPLPP	β-casein	14	P	L
EQQQTEDELQDKIHPFAQ	β-casein	18	Q	E
HKEMPFPKYPVEPFTESQSLTLTDVENLHLPLPLL	β-casein	35	L	H
VENLHLPLPLLQSW	β-casein	14	W	V
IHPFAQTQSLVYPFPG	β-casein	16	G	I
LVYPFPGPIPNSLPQNI	β-casein	17	I	L
QPEVMGVSKVKEAMAPKHKEMPFPKYPVEPFTESQSLT	β-casein	38	T	Q
QSLTLTDVE	β-casein	9	E	Q
VPPFLQPEVMGVSKVKEAMAPKH	β-casein	23	H	V
SLTLTDVENLHLPLPLLQSW	β-casein	20	W	S
VPPFLQPE	β-casein	8	E	V
LHLPLPLLQSWMHQPHQPLPPTVMFP	β-casein	26	P	L
TQTPVVVPPFLQPEVMGVSKVKEAM	β-casein	25	M	T
VLGPVRGPFPII	β-casein	12	I	V
LEELNVPGEIVES	β-casein	13	S	L
NSLPQNI	β-casein	7	I	N
PQNIPPLTQTPVVVPPFLQPEVMGVSKVKEAM	β-casein	32	M	P
LQPEVMGVSKVKEAMAPKHKEMPFPKYPVEPFTESQSLTLTDVEN	β-casein	45	N	L
AQTQSLVYPFPGPIP	β-casein	15	P	A
NVPGEIVESLS	β-casein	11	S	N
VENLHLPLPLLQSWMH	β-casein	16	H	V
FAQTQSLVY	β-casein	9	Y	F
IEKFQSEEQQQTEDELQDKIHP	β-casein	22	P	I
GPIPNSLPQN	β-casein	10	N	G
TDVENLHLPLPLLQSWMHQPHQPLPPTVMFPPQSVL	β-casein	36	L	T
EKFQSEEQQQTE	β-casein	12	E	E
IPPLTQTPVVVPPFLQPEVMGVSKVKE	β-casein	27	E	I
QTEDELQDKIHPFAQTQS	β-casein	18	S	Q
IPNSLPQNIPPLTQTPVVVPPFLQPEVMGVSKVKEAMAPKH	β-casein	41	H	I
AFLLYQEPVLGP	β-casein	12	P	A
AVPYPQRDMPIQAF	β-casein	14	F	A
PQSVLSLSQSKVLPVPQKAVPYPQRDMPIQAFLLYQEP	β-casein	38	P	P
QPHQPLPPTVMFPPQSVLSLSQ	β-casein	22	Q	Q
FAQTQSLVYPFPGPI	β-casein	15	I	F
QQQTEDELQDKIHPFAQTQSLVYPFPGPIPNSLPQN	β-casein	36	N	Q
TQTPVVVPPFLQPE	β-casein	14	E	T
VPPFLQPEVMG	β-casein	11	G	V
QDKIHPFAQTQSLVY	β-casein	15	Y	Q
QSLTLTDVENLHLPLPLLQS	β-casein	20	S	Q
SKVKEAMAPKHKEMPFPKYPVEPFTESQSLTL	β-casein	32	L	S
KIEKFQSEEQQQTED	β-casein	15	D	K
KIEKFQSEEQQQTEDELQDKIHP	β-casein	23	P	K
VVVPPFLQPEVMGVSKVKEAMAPKHKEMPFPKYPVEPFTESQSLTLTDV	β-casein	49	V	V
LTLTDVENLHLP	β-casein	12	P	L
ELEELNVP	β-casein	8	P	E
PHQPLPPTVMFPPQSVL	β-casein	17	L	P
SQSLTLTDVENLHLPLPLLQSWMHQPH	β-casein	27	H	S
TDVENLHLPLPLLQSWMHQPHQPLPPTVMFPPQSVLS	β-casein	37	S	T
SLPQNIPPLTQTPVVVP	β-casein	17	P	S
MGVSKVKEAMAPKHKEMPFPKY	β-casein	22	Y	M
SLSSSEESITRINKKIEKFQSEEQ	β-casein	24	Q	S
AVPYPQRDMPIQA	β-casein	13	A	A
QTEDELQD	β-casein	8	D	Q
QPEVMGVSKVK	β-casein	11	K	Q
LVYPFPGPIPNSLPQNIPPLTQTPVVVPPFLQPEVMGVS	β-casein	39	S	L
KEAMAPKHKEMP	β-casein	12	P	K
TEDELQDKIHPFAQTQS	β-casein	17	S	T
PFAQTQSLVYPFPGPIPNSL	β-casein	20	L	P
KEAMAPK	β-casein	7	K	K
TQSLVYPFPGPIP	β-casein	13	P	T
MFPPQSVLSLSQSKV	β-casein	15	V	M
HPFAQTQSLVYPFP	β-casein	14	P	H
PLLQSWMHQPHQPLPP	β-casein	16	P	P
PHQPLPPTVMFPPQSVLSLS	β-casein	20	S	P
VKEAMAPKHKEM	β-casein	12	M	V
GEIVESLSSSEESITRI	β-casein	17	I	G
LLQSWMHQPHQPLPPTVMFP	β-casein	20	P	L
HQPHQPLPPTVMFPPQSVLS	β-casein	20	S	H
PTVMFPPQSVLSLSQSK	β-casein	17	K	P
TLTDVENLHLPLPLLQSWMHQP	β-casein	22	P	T
DMPIQAFLLY	β-casein	10	Y	D
QSVLSLSQ	β-casein	8	Q	Q
LTLTDVENLHLPLPLLQS	β-casein	18	S	L
PFTESQSLTLTDVENLHL	β-casein	18	L	P
PLPPTVMFPPQSVLSLSQSKVLPVPQKAVP	β-casein	30	P	P
TQTPVVVPPFLQPEVMGVSKVKEAMAPKHKEMPFPKYPVEPFT	β-casein	43	T	T
SLVYPFPGPIPNSLPQNIP	β-casein	19	P	S
DELQDKIHPFAQTQSLVY	β-casein	18	Y	D
LQPEVMGVSKV	β-casein	11	V	L
DMPIQAFLLYQEPVLGP	β-casein	17	P	D
MPIQAFLLYQEP	β-casein	12	P	M
QQQTEDELQDKIHPFAQTQSLVYPFPGPIPNSLPQNIPPLTQTPVVVPPF	β-casein	50	F	Q
PQRDMPIQAFLLYQEPVLGPVRGPFPI	β-casein	27	I	P
LVYPFPGPIPNSLPQN	β-casein	16	N	L
PPFLQPEVMGVSKVKEAMA	β-casein	19	A	P
QSEEQQQ	β-casein	7	Q	Q
SKVKEAMAPKHKEMPFPKY	β-casein	19	Y	S
EELNVPGEIVESLSSSEESITRINKKIEKFQSEEQQQTEDELQ	β-casein	43	Q	E
EMPFPKYPVEPFTESQSLTLTDVENLHLPLPLLQS	β-casein	35	S	E
QPLPPTVMFPPQS	β-casein	13	S	Q
PVEPFTESQSLTL	β-casein	13	L	P
MAPKHKEM	β-casein	8	M	M
PPTVMFPPQSVLSLSQSKV	β-casein	19	V	P
TQSLVYPFPGPIPNSLPQNIPPLTQTPV	β-casein	28	V	T
DKIHPFAQTQSLVYPFPGPIPNSLPQ	β-casein	26	Q	D
SEEQQQTEDELQDKIHPFAQTQSLV	β-casein	25	V	S
AQTQSLVYP	β-casein	9	P	A
PIPNSLPQNIPPLTQTPVVVPPFLQPEVMGVS	β-casein	32	S	P
PIQAFLLYQEPVL	β-casein	13	L	P
QAFLLYQEPVLGP	β-casein	13	P	Q
SQSLTLTDVENLHLPLPLLQSWMHQPHQPLPPTVMFPPQSVLS	β-casein	43	S	S
QPLPPTVMFPPQSV	β-casein	14	V	Q
DELQDKIHPFAQTQSLVYPFPG	β-casein	22	G	D
IPNSLPQN	β-casein	8	N	I
LPVPQKAVPYPQRD	β-casein	14	D	L
KEMPFPKYPVEPFTESQSLTLTDVENLHLPLPLLQSWMHQ	β-casein	40	Q	K
KKIEKFQSEEQQQTEDEL	β-casein	18	L	K
KEMPFPKYPVEPFTESQSLTLTDVENLHLPLPLLQSWMH	β-casein	39	H	K
VVPPFLQPEVMGVSKVKE	β-casein	18	E	V
PIPNSLPQNIPPLTQTPVVVPPFLQPEVMGVSKVKEAM	β-casein	38	M	P
EPFTESQSLTLTDVENLHLP	β-casein	20	P	E
RELEELNVPGEIVESLS	β-casein	17	S	R
IHPFAQTQSLVYPFP	β-casein	15	P	I
EESITRINKKIEKFQSE	β-casein	17	E	E
DKIHPFAQTQSLVYPFP	β-casein	17	P	D
QSLVYPFPGPIPNSLPQNIPPLTQTPVVVPPFLQPEV	β-casein	37	V	Q
PPFLQPEVMGVSKVKEAMAPKHKEMPFP	β-casein	28	P	P
SQSLTLTDVE	β-casein	10	E	S
HQPHQPLPP	β-casein	9	P	H
QAFLLYQEPVLGPV	β-casein	14	V	Q
QKAVPYPQRDMPIQAFLLYQEPV	β-casein	23	V	Q
SLTLTDVENLHLPLPLLQSWMH	β-casein	22	H	S
PGPIPNSLPQNI	β-casein	12	I	P
TDAPSFSDIPNPIGSENSEK	αs1-casein	20	K	T
TDAPSFSDIPNPI	αs1-casein	13	I	T
EPMIGVNQELA	αs1-casein	11	A	E
HQGLPQEVLNENL	αs1-casein	13	L	H
EGIHAQQKEPMIGVNQELA	αs1-casein	19	A	E
FVAPFPEVFG	αs1-casein	10	G	F
HIQKEDVPSE	αs1-casein	10	E	H
HPIKHQGLPQEV	αs1-casein	12	V	H
PQEVLNENLLRFFVAP	αs1-casein	16	P	P
HQGLPQEVLNEN	αs1-casein	12	N	H
FFVAPFPEVFG	αs1-casein	11	G	F
HIQKEDVPSER	αs1-casein	11	R	H
HPIKHQGLPQEVLNENL	αs1-casein	17	L	H
EPMIGVNQEL	αs1-casein	10	L	E
EPMIGVNQELAYFYPELF	αs1-casein	18	F	E
EPMIGVNQELAYFYPEL	αs1-casein	17	L	E
EPMIGVNQELAYFYPELFR	αs1-casein	19	R	E
EGIHAQQKEPMIGVNQELAYFYPELF	αs1-casein	26	F	E
EGIHAQQKEPMIGVNQELAYFYPELFR	αs1-casein	27	R	E
TDAPSFSDIPNPIGSENSEKT	αs1-casein	21	T	T
EGIHAQQKEPMIGVNQEL	αs1-casein	18	L	E
EGIHAQQKEPMIGVNQELAYFYPEL	αs1-casein	25	L	E
TDAPSFSDIPNPIGSENSE	αs1-casein	19	E	T
HPIKHQGLPQEVLNEN	αs1-casein	16	N	H
YKVPQLEIVPNSAEER	αs1-casein	16	R	Y
HPIKHQGLPQEVL	αs1-casein	13	L	H
TDAPSFSDIPNPIGSEN	αs1-casein	17	N	T
YLGYLEQLLR	αs1-casein	10	R	Y
QLDAYPSGAW	αs1-casein	10	W	Q
GTQYTDAPSFSDIPNPIGSENSEK	αs1-casein	24	K	G
EPMIGVNQELAY	αs1-casein	12	Y	E
EPMIGVNQELAYF	αs1-casein	13	F	E
KVPQLEIVPNSAEER	αs1-casein	15	R	K
EGIHAQQKEPM	αs1-casein	11	M	E
GLPQEVLNENL	αs1-casein	11	L	G
GTQYTDAPSFSDIPNPI	αs1-casein	17	I	G
EGIHAQQKEPMIGVNQELAYF	αs1-casein	21	F	E
DIPNPIGSENSEK	αs1-casein	13	K	D
VPQLEIVPNSAEER	αs1-casein	14	R	V
EGIHAQQKEPMIGV	αs1-casein	14	V	E
IGVNQELAYFYPEL	αs1-casein	14	L	I
ISSSEEIVPNSVEQKHIQKE	αs1-casein	20	E	I
VAPFPEVFGK	αs1-casein	10	K	V
FVAPFPEVFGK	αs1-casein	11	K	F
APFPEVFGKEKVN	αs1-casein	13	N	A
QKEPMIGVNQELA	αs1-casein	13	A	Q
KEGIHAQQKEPMIGVNQELAYFYPEL	αs1-casein	26	L	K
FFVAPFPEVFGK	αs1-casein	12	K	F
IGVNQELAYFYPELFR	αs1-casein	16	R	I
VAPFPEVFGKE	αs1-casein	11	E	V
PNPIGSENSEK	αs1-casein	11	K	P
YVPLGTQYTDAPSFSDIPNPI	αs1-casein	21	I	Y
YQLDAYPSGAW	αs1-casein	11	W	Y
QKEPMIGVNQELAYFYPEL	αs1-casein	19	L	Q
PMIGVNQELAYFYPELFRQ	αs1-casein	19	Q	P
PSFSDIPNPIGSENSEK	αs1-casein	17	K	P
EGIHAQQKEPMIGVNQELAYFYPE	αs1-casein	24	E	E
IQKEDVPSER	αs1-casein	10	R	I
RPKHPIKHQGLPQEV	αs1-casein	15	V	R
VEQKHIQKEDVPSERYLGYLEQLL	αs1-casein	24	L	V
HSMKEGIHAQQKEPMIGVNQELAY	αs1-casein	24	Y	H
VPNSVEQKHIQKEDVPSERY	αs1-casein	20	Y	V
YTDAPSFSDIPNPI	αs1-casein	14	I	Y
KEPMIGVNQELA	αs1-casein	12	A	K
IGVNQELAYFYPELFRQFYQLDA	αs1-casein	23	A	I
KEPMIGVNQELAY	αs1-casein	13	Y	K
LPQEVLNENLLRFF	αs1-casein	14	F	L
EEIVPNSVEQKHIQKEDVPSE	αs1-casein	21	E	E
TDAPSFSDIPNPIGSENSEKTTMPLW	αs1-casein	26	W	T
PSFSDIPNPI	αs1-casein	10	I	P
KEGIHAQQKEPMIGVNQELAY	αs1-casein	21	Y	K
VPLGTQYTDAPSFSDIPNPI	αs1-casein	20	I	V
QYTDAPSFSDIPNPI	αs1-casein	15	I	Q
ISSSEEIVPNSVEQKHIQKEDVPS	αs1-casein	24	S	I
SVEQKHIQKEDVP	αs1-casein	13	P	S
QKEPMIGVNQELAYFY	αs1-casein	16	Y	Q
LLRLKKYKVPQL	αs1-casein	12	L	L
AYFYPELFRQFYQLDAY	αs1-casein	17	Y	A
APSFSDIPNPIGSENSEK	αs1-casein	18	K	A
FVAPFPEVFGKEKVN	αs1-casein	15	N	F
EEIVPNSVEQKHI	αs1-casein	13	I	E
QKEDVPSERYL	αs1-casein	11	L	Q
ESISSSEEIVPNSVEQKHIQKEDVPSER	αs1-casein	28	R	E
NLLRFFVAPFPEVFGKEKVNELSKDIG	αs1-casein	27	G	N
HPIKHQGLPQEVLNENLLRFFVAPFPE	αs1-casein	27	E	H
ISSSEEIVPNSVEQK	αs1-casein	15	K	I
SVEQKHIQKEDVPSERYLGYLEQ	αs1-casein	23	Q	S
ESISSSEEIVPNSVEQKHIQK	αs1-casein	21	K	E
KEGIHAQQKEPMIGVNQELA	αs1-casein	20	A	K
IVPNSAEERLHSMKEGIHAQQKEPMI	αs1-casein	26	I	I
EEIVPNSVEQKHIQ	αs1-casein	14	Q	E
GIHAQQKEPMIGVNQELAY	αs1-casein	19	Y	G
YFYPELFRQFYQLDAYPSGA	αs1-casein	20	A	Y
HIQKEDVPSERYL	αs1-casein	13	L	H
KYKVPQLEIVPNSAEER	αs1-casein	17	R	K
VPNSAEERLHSMKEGIHAQ	αs1-casein	19	Q	V
QKHIQKEDVPSERYLGYLEQLL	αs1-casein	22	L	Q
LPQEVLNENLLRFFVAPFPEVFGKEK	αs1-casein	26	K	L
MIGVNQELAYFYP	αs1-casein	13	P	M
SMKEGIHAQQKEPMIGVNQELAY	αs1-casein	23	Y	S
SSEEIVPNSVEQKHIQ	αs1-casein	16	Q	S
EAESISSSEEIVPNSV	αs1-casein	16	V	E
WYYVPLGTQYTDAPSFSDIPNPIGSE	αs1-casein	26	E	W
VAPFPEVFG	αs1-casein	9	G	V
VAPFPEV	αs1-casein	7	V	V
HQGLPQEV	αs1-casein	8	V	H
YVPLGTQ	αs1-casein	7	Q	Y
YLGYLEQ	αs1-casein	7	Q	Y
EGIHAQQK	αs1-casein	8	K	E
EKVNELS	αs1-casein	7	S	E
IGVNQELA	αs1-casein	8	A	I
HQGLPQEVL	αs1-casein	9	L	H
EDVPSER	αs1-casein	7	R	E
FVAPFPEV	αs1-casein	8	V	F
YVPLGTQY	αs1-casein	8	Y	Y
ELFRQFYQLDAYPSGA	αs1-casein	16	A	E
YKVPQLEIVPN	αs1-casein	11	N	Y
YLGYLEQL	αs1-casein	8	L	Y
VNELSKDIGSESTEDQAM	αs1-casein	18	M	V
LGYLEQL	αs1-casein	7	L	L
EGIHAQQ	αs1-casein	7	Q	E
AYFYPEL	αs1-casein	7	L	A
FFVAPFPEV	αs1-casein	9	V	F
KDIGSESTEDQAME	αs1-casein	14	E	K
LDAYPSGAW	αs1-casein	9	W	L
VAPFPEVF	αs1-casein	8	F	V
QLDAYPSGA	αs1-casein	9	A	Q
PFPEVFG	αs1-casein	7	G	P
QFYQLDAYPSGAWYYVPLGTQYTDAPSFSDIPNPIGSENSEKT	αs1-casein	43	T	Q
NSVEQKHIQ	αs1-casein	9	Q	N
DVPSERYLGYLEQL	αs1-casein	14	L	D
YFYPELF	αs1-casein	7	F	Y
YYVPLGTQ	αs1-casein	8	Q	Y
VPQLEIVPN	αs1-casein	9	N	V
EIVPNSVEQKHIQKEDV	αs1-casein	17	V	E
ENLLRFFVAPFPEVFGKEK	αs1-casein	19	K	E
QLDAYPS	αs1-casein	7	S	Q
IKHQGLPQEVLNENLLRFFVAPFPEVFGKEKVNELSKDIG	αs1-casein	40	G	I
KHPIKHQGLPQEVLNENLL	αs1-casein	19	L	K
VFGKEKVNELSKDIGSESTED	αs1-casein	21	D	V
PMIGVNQELAYFYPELFRQFYQLDAYPSGAWY	αs1-casein	32	Y	P
KQMEAESISSSEEIVPNS	αs1-casein	18	S	K
IQKEDVPSE	αs1-casein	9	E	I
DAYPSGA	αs1-casein	7	A	D
SAEERLHSMKEGIHAQQKEPMIGVNQEL	αs1-casein	28	L	S
IKHQGLPQEVLNENLL	αs1-casein	16	L	I
AESISSSEEIVPNSVEQKHIQ	αs1-casein	21	Q	A
AQQKEPMIG	αs1-casein	9	G	A
QYTDAPSFSDIPNPIGSENSEK	αs1-casein	22	K	Q
IGVNQELAYFYPELF	αs1-casein	15	F	I
QFYQLDAYPSGAWYYVPLGTQYTDAP	αs1-casein	26	P	Q
EPMIGVN	αs1-casein	7	N	E
VPNSAEERLHSMKEGIHAQQKEPMIGVNQ	αs1-casein	29	Q	V
KEPMIGVNQEL	αs1-casein	11	L	K
GIHAQQK	αs1-casein	7	K	G
YVPLGTQYTDAPSFSDIPNPIGSENSEK	αs1-casein	28	K	Y
FVAPFPEVF	αs1-casein	9	F	F
YYVPLGTQY	αs1-casein	9	Y	Y
MEAESISSSEEIVPNSVEQKHIQKEDV	αs1-casein	27	V	M
EIVPNSVEQKHIQ	αs1-casein	13	Q	E
DIGSESTEDQAMEDIKQMEAESI	αs1-casein	23	I	D
QELAYFYPELFRQFYQLDAYPSGAWYYVPLG	αs1-casein	31	G	Q
SDIPNPIGSENSEKTTMP	αs1-casein	18	P	S
RLKKYKVPQLEIVPNSAEERLHSMKEGIH	αs1-casein	29	H	R
AQQKEPMIGVNQELAYFYPELFRQFYQLDAYPSGAWYYVPLGTQYTDAPS	αs1-casein	50	S	A
EKVNELSKDIGSESTED	αs1-casein	17	D	E
EERLHSMKEGIHAQ	αs1-casein	14	Q	E
PQLEIVPNSAEERLHSMKEGIHAQQKEPMIGVNQELA	αs1-casein	37	A	P
PNSVEQKHIQKEDVPSE	αs1-casein	17	E	P
IVPNSVEQKHIQKEDVPS	αs1-casein	18	S	I
KVPQLEIVPNSAEERLHSMKEGIHAQQKEPMIG	αs1-casein	33	G	K
EVLNENLLRFFVAPFP	αs1-casein	16	P	E
AQQKEPMIGVNQELA	αs1-casein	15	A	A
HIQKEDVPSERYLGY	αs1-casein	15	Y	H
DIKQMEAESISSSEE	αs1-casein	15	E	D
EDVPSERYLGYLEQ	αs1-casein	14	Q	E
SFSDIPNPIGSENSEKTTMP	αs1-casein	20	P	S
PFPEVFGKEKVNELS	αs1-casein	15	S	P
QYTDAPSFSDIPNPIGSENSEKTT	αs1-casein	24	T	Q
KHQGLPQEV	αs1-casein	9	V	K
KHQGLPQEVL	αs1-casein	10	L	K
KEPMIGVNQELAYFYPELF	αs1-casein	19	F	K
HQGLPQEVLN	αs1-casein	10	N	H
EKVNELSKDIGSESTEDQAMEDIK	αs1-casein	24	K	E
NSVEQKHIQKEDVPSERYLGYLEQL	αs1-casein	25	L	N
SDIPNPI	αs1-casein	7	I	S
ERLHSMKEGIHAQQKEPMI	αs1-casein	19	I	E
DIGSESTEDQAME	αs1-casein	13	E	D
GVNQELAYFYPELFR	αs1-casein	15	R	G
IKHQGLPQEVLNENLLRFFVAPFPEVFGKE	αs1-casein	30	E	I
VPQLEIVPNSAEERLHSMKEGIHAQ	αs1-casein	25	Q	V
EDVPSERYLGYLEQLL	αs1-casein	16	L	E
VPLGTQYTDAPSFSDIPNP	αs1-casein	19	P	V
SKDIGSESTEDQAMEDIKQMEAESIS	αs1-casein	26	S	S
NENLLRFFVA	αs1-casein	10	A	N
NELSKDIGSESTEDQAMEDIKQM	αs1-casein	23	M	N
QKEDVPSERYLGYLEQLL	αs1-casein	18	L	Q
KHQGLPQEVLN	αs1-casein	11	N	K
AMEDIKQ	αs1-casein	7	Q	A
VEQKHIQKEDVP	αs1-casein	12	P	V
PELFRQFYQ	αs1-casein	9	Q	P
SVEQKHIQKEDVPSERY	αs1-casein	17	Y	S
AMEDIKQMEAESISSSEEIVPNSVEQ	αs1-casein	26	Q	A
IQKEDVPSERY	αs1-casein	11	Y	I
GVNQELAYFYPELFRQFYQLDAYPSGAWYYVPLGTQYTDAPSFSDI	αs1-casein	46	I	G
QKEPMIGVNQELAYF	αs1-casein	15	F	Q
ESISSSEEIVPNSVEQKHI	αs1-casein	19	I	E
IGSENSEKTTMPLW	αs1-casein	14	W	I
YQLDAYPSGAWYYVPLGTQYTDAP	αs1-casein	24	P	Y
IKQMEAESISSSEEIVPNSV	αs1-casein	20	V	I
EQKHIQKEDVPSERYLGYL	αs1-casein	19	L	E
QGLPQEVLNENLLRFF	αs1-casein	16	F	Q
SDIPNPIGSENSEKTTMPL	αs1-casein	19	L	S
IVPNSAEE	αs1-casein	8	E	I
AEERLHSMKEGIHAQQK	αs1-casein	17	K	A
LGTQYTDAPSFSDIPNPI	αs1-casein	18	I	L
EIVPNSVEQKHIQKEDVPSERYLGYLEQLLRLKKYKVPQLEIVPNSAEER	αs1-casein	50	R	E
PLGTQYTDAPSFSDIPNP	αs1-casein	18	P	P
VPSERYLGYLEQLLRLKKYKVPQLEIVPNSAEERLHSMKEGIHAQQK	αs1-casein	47	K	V
LSKDIGSESTEDQAMEDIKQMEA	αs1-casein	23	A	L
NQELAYFYPELFRQ	αs1-casein	14	Q	N
SISSSEEIVPNSV	αs1-casein	13	V	S
QLDAYPSGAWYYVPLGTQY	αs1-casein	19	Y	Q
RPKHPIKHQGLPQEVLNE	αs1-casein	18	E	R
EVLNENLLRFFVAPFPE	αs1-casein	17	E	E
APFPEVFG	αs1-casein	8	G	A
PIKHQGLPQEVLNENLLRFFVAPFPEVFGKEKVNELSKDI	αs1-casein	40	I	P
LGTQYTDAPSFSDIPNPIGS	αs1-casein	20	S	L
PEVFGKEKVN	αs1-casein	10	N	P
LEIVPNSAEERLHSMKEGIHAQQKEPMIGVNQELAYFYPELFRQFYQLDAYPSGAWYY	αs1-casein	58	Y	L
VAPFPEVFGKEKVNELS	αs1-casein	17	S	V
EDQAMEDIKQMEAESISSSEEIV	αs1-casein	23	V	E
EDIKQMEAESISSSEEIVPNSVEQK	αs1-casein	25	K	E
DIGSESTEDQAMEDIKQMEAESISSSEEIVPNSVEQK	αs1-casein	37	K	D
HQGLPQEVLNENLLRFFVA	αs1-casein	19	A	H
AESISSSEEIVPNSVE	αs1-casein	16	E	A
ISSSEEIVPNSVE	αs1-casein	13	E	I
AYFYPELFRQFYQLDAYPSGAW	αs1-casein	22	W	A
ENLLRFFVAPFPEVFGKEKVNELSKDIGSES	αs1-casein	31	S	E
IVPNSAEERLHSMKE	αs1-casein	15	E	I
IQKEDVPSERYLGYLEQLL	αs1-casein	19	L	I
KEKVNELSKDIGSESTEDQAMEDIKQMEAESISSSEEIVPNSVEQKHI	αs1-casein	48	I	K
EDQAMEDIKQM	αs1-casein	11	M	E
FPEVFGKEKVNELSKDIGSESTEDQAMEDIK	αs1-casein	31	K	F
GAWYYVPLGTQYTDAPSFSDIPNPIGSEN	αs1-casein	29	N	G
IQKEDVPSERYL	αs1-casein	12	L	I
TQYTDAPSFSDIPNPIGSENS	αs1-casein	21	S	T
QELAYFYPELFRQFYQLDAY	αs1-casein	20	Y	Q
IQKEDVPSERYLGYL	αs1-casein	15	L	I
IVPNSVEQK	αs1-casein	9	K	I
RLHSMKEGIHAQQKEPM	αs1-casein	17	M	R
QELAYFYPELFRQFY	αs1-casein	15	Y	Q
VPLGTQYTDAPSFSDIP	αs1-casein	17	P	V
EIVPNSVEQKHIQKEDVPSERY	αs1-casein	22	Y	E
QKEPMIGVNQE	αs1-casein	11	E	Q
QLDAYPSGAWYYVPLGTQ	αs1-casein	18	Q	Q
NQELAYFYPELFRQFY	αs1-casein	16	Y	N
VPLGTQYTDAPSFSDIPNPIGSENSEKTTMPLW	αs1-casein	33	W	V
PSFSDIPNPIGSENSEKTT	αs1-casein	19	T	P
EVFGKEKVNELS	αs1-casein	12	S	E
DIPNPIGSE	αs1-casein	9	E	D
PEVFGKEKVNELSKDIGSE	αs1-casein	19	E	P
PELFRQFYQLDAYPSGAWYYVPL	αs1-casein	23	L	P
DVPSERYL	αs1-casein	8	L	D
QYTDAPSFSDIPNPIGSE	αs1-casein	18	E	Q
SVEQKHIQKEDVPSERYLGYLEQLLRLKKYKVPQLEIV	αs1-casein	38	V	S
YYVPLGTQYTDAPSFSDIPNPI	αs1-casein	22	I	Y
LFRQFYQLDAYPSGAWYYVPLGTQYTDAPSFSDIP	αs1-casein	35	P	L
DAPSFSDIPNPIGSENSEKT	αs1-casein	20	T	D
FFVAPFPEVFGKEKVNELS	αs1-casein	19	S	F
SVEQKHIQKEDVPS	αs1-casein	14	S	S
QAMEDIKQMEAESISSSEEIVPNSV	αs1-casein	25	V	Q
PFPEVFGKEKVN	αs1-casein	12	N	P
LHSMKEGIHAQQK	αs1-casein	13	K	L
RLHSMKEGIHAQQKEPMIGVNQELAYFYPELFRQFYQ	αs1-casein	37	Q	R
PKHPIKHQGLPQEVLNENLL	αs1-casein	20	L	P
AQQKEPMIGVNQELAYFYPELFRQF	αs1-casein	25	F	A
SERYLGYLEQLLRLKKYKV	αs1-casein	19	V	S
AQQKEPMIGVNQELAYFYPELFRQFYQL	αs1-casein	28	L	A
FYQLDAYPSGAWYYVPLGTQYTDAP	αs1-casein	25	P	F
PSFSDIPNPIGSENSEKTTMPLW	αs1-casein	23	W	P
SGAWYYVPLGTQYTDAPSFSDIPNP	αs1-casein	25	P	S
DQAMEDIKQMEAESISSSE	αs1-casein	19	E	D
VFGKEKVNELSKDIGSESTEDQAMED	αs1-casein	26	D	V
LDAYPSGAWYYVPLGTQYTDAPSFSDIPNP	αs1-casein	30	P	L
QELAYFYPELFRQFYQLD	αs1-casein	18	D	Q
IGSESTEDQAMEDIK	αs1-casein	15	K	I
SAEERLHSMKEGIHAQQKEP	αs1-casein	20	P	S
EQKHIQKEDVPSERYLGYLEQLLRLKKYKVP	αs1-casein	31	P	E
PSERYLGYLEQLLRLKKYKVPQLEIVPNS	αs1-casein	29	S	P
VEQKHIQKEDVPSERYLGY	αs1-casein	19	Y	V
QEVLNENLLRFFVAP	αs1-casein	15	P	Q
VNQELAYFYPELFRQ	αs1-casein	15	Q	V
PELFRQFYQLDAYPSGAWYYVP	αs1-casein	22	P	P
SDIPNPIGSENSEK	αs1-casein	14	K	S
QKHIQKEDVPSERYLGY	αs1-casein	17	Y	Q
SSEEIVPNSV	αs1-casein	10	V	S
EIVPNSVEQKHIQKEDVPSERYLGYLEQLLRLK	αs1-casein	33	K	E
SISSSEEIVPNSVEQKHIQKED	αs1-casein	22	D	S
MKEGIHAQQKEPMIGVNQELAYFYP	αs1-casein	25	P	M
AYFYPELFRQFYQLDAYPSGAWYYVPLGTQYTDA	αs1-casein	34	A	A
WYYVPLGTQYTDAPSFSDIPNPIGS	αs1-casein	25	S	W
NSVEQKHIQKEDVPS	αs1-casein	15	S	N
PNSAEERL	αs1-casein	8	L	P
PSGAWYYVPLGTQY	αs1-casein	14	Y	P
NENLLRFFVAPFPEVFGKEKVN	αs1-casein	22	N	N
KEKVNELSKDIGSESTEDQAMEDIKQME	αs1-casein	28	E	K
ENLLRFFVAPFPEVF	αs1-casein	15	F	E
EVFGKEKVNELSKDIGSESTEDQAMEDIKQMEAESISSSEEIVPNSVEQKH	αs1-casein	51	H	E
WYYVPLGTQYTDAPSFSDI	αs1-casein	19	I	W
LGTQYTDAPSFSDIPNPIGSE	αs1-casein	21	E	L
PNPIGSENSEKTTMPLW	αs1-casein	17	W	P
GYLEQLLR	αs1-casein	8	R	G
IKQMEAESISSSEEIVPNSVE	αs1-casein	21	E	I
IHAQQKEPMIGVN	αs1-casein	13	N	I
LSKDIGSES	αs1-casein	9	S	L
VPQLEIVPNSAEERLH	αs1-casein	16	H	V
IQKEDVP	αs1-casein	7	P	I
FYPELFRQFYQLDAYPSG	αs1-casein	18	G	F
QYTDAPSFSDIPNPIGSENSEKTTMP	αs1-casein	26	P	Q
YVPLGTQYTDAPSFSDIPNPIG	αs1-casein	22	G	Y
GVNQELAYFYPELFRQFYQ	αs1-casein	19	Q	G
QAMEDIKQMEAESISSSEEIV	αs1-casein	21	V	Q
HIQKEDVPSERYLGYLEQLL	αs1-casein	20	L	H
HSMKEGIHAQQKEPMIGV	αs1-casein	18	V	H
EVLNENL	αs1-casein	7	L	E
EIVPNSVEQ	αs1-casein	9	Q	E
QEVLNENLLRFFVAPF	αs1-casein	16	F	Q
AMEDIKQMEAESISSSEEIV	αs1-casein	20	V	A
ISSSEEIVPNSVEQKHIQK	αs1-casein	19	K	I
QQKEPMIGVNQELAYFYPE	αs1-casein	19	E	Q
ERYLGYLEQLL	αs1-casein	11	L	E
PMIGVNQELAYFYPEL	αs1-casein	16	L	P
PQLEIVPNSAEERLHSMKEG	αs1-casein	20	G	P
RPKHPIKHQGLPQEVLNENLLRFFVA	αs1-casein	26	A	R
IVPNSVEQKHI	αs1-casein	11	I	I
EVFGKEKVNELSKDI	αs1-casein	15	I	E
HSMKEGIHAQQKEPMIGVNQELAYFYPELFRQFYQLD	αs1-casein	37	D	H
YKVPQLEIVPNSAE	αs1-casein	14	E	Y
EERLHSMKEGIH	αs1-casein	12	H	E
EKVNELSKDIGSEST	αs1-casein	15	T	E
ESISSSEEIVPNSVEQKH	αs1-casein	18	H	E
HAQQKEPMIGVNQELAYF	αs1-casein	18	F	H
RLHSMKEGIHAQQKEPMIGVNQELAYFYPELFRQF	αs1-casein	35	F	R
QKEPMIGVNQELAYFYPELF	αs1-casein	20	F	Q
HAQQKEPMIGVNQ	αs1-casein	13	Q	H
PNSVEQKHIQKEDVPSERYLGY	αs1-casein	22	Y	P
RQFYQLDAYPSGAWYYVPLG	αs1-casein	20	G	R
HAQQKEPMIGVNQELAYFYPE	αs1-casein	21	E	H
HIQKEDVPSERY	αs1-casein	12	Y	H
MEDIKQMEAESISSSEEIVPNSVEQK	αs1-casein	26	K	M
QGLPQEVLNEN	αs1-casein	11	N	Q
KEDVPSERYLGYLEQLLRLKKYKVPQLEIVPNSAEERLH	αs1-casein	39	H	K
PNSVEQKHIQKEDV	αs1-casein	14	V	P
NENLLRFFVAPFPEVFGKEK	αs1-casein	20	K	N
ELSKDIGSEST	αs1-casein	11	T	E
ELSKDIGSESTEDQAMEDIKQMEAESIS	αs1-casein	28	S	E
LAYFYPELFRQFYQLD	αs1-casein	16	D	L
ATLEDSPEVIESPPEINTVQ	κ-casein	20	Q	A
INNQFLPYPY	κ-casein	10	Y	I
NQDKTEIPTINT	κ-casein	12	T	N
KNQDKTEIPTINT	κ-casein	13	T	K
NQDKTEIPTINTI	κ-casein	13	I	N
TVPAKSCQAQPTTMARHP	κ-casein	18	P	T
KNQDKTEIPTINTI	κ-casein	14	I	K
ASGEPTSTPTTEAVESTV	κ-casein	18	V	A
ALINNQFLPYPY	κ-casein	12	Y	A
ASGEPTSTPTTEAVEST	κ-casein	17	T	A
SPAQILQWQVL	κ-casein	11	L	S
SPAQILQWQV	κ-casein	10	V	S
PEVIESPPEINTVQVTST	κ-casein	18	T	P
FLPYPYYAKPAAVRSPAQILQWQVL	κ-casein	25	L	F
ASGEPTSTPTTEAVES	κ-casein	16	S	A
NQDKTEIPTIN	κ-casein	11	N	N
YQQKPVALINNQFL	κ-casein	14	L	Y
PHPHLSFMAIPPKKNQDKTEIPT	κ-casein	23	T	P
QQKPVALINNQFLPYPY	κ-casein	17	Y	Q
VIESPPEINTVQVTS	κ-casein	15	S	V
SPEVIESPPEINTV	κ-casein	14	V	S
KNQDKTEIPTIN	κ-casein	12	N	K
NQFLPYPYYAKPAAVRSPAQ	κ-casein	20	Q	N
PPEINTVQVTSTA	κ-casein	13	A	P
DERFFSDKIAKYIP	κ-casein	14	P	D
FMAIPPKKNQDKTEIPTINTI	κ-casein	21	I	F
EQNQEQPIRCEK	κ-casein	12	K	E
WQVLSNTVPAKSCQAQPTTM	κ-casein	20	M	W
LSRYPSYGLNYYQQKPVALINNQFL	κ-casein	25	L	L
YYAKPAAVRSPAQILQWQ	κ-casein	18	Q	Y
INTIASGEPTSTPTTEAV	κ-casein	18	V	I
KPAAVRSPAQILQWQVLSNTVPAKSCQA	κ-casein	28	A	K
IPTINTIASGEPTSTPTTEAVES	κ-casein	23	S	I
ESPPEINTVQVTS	κ-casein	13	S	E
PSYGLNYYQQK	κ-casein	11	K	P
WQVLSNTVPAKSCQAQPTTMAR	κ-casein	22	R	W
PTSTPTTEAVESTVATLEDSPEVIESPPEI	κ-casein	30	I	P
PHLSFMAIPPK	κ-casein	11	K	P
PYYAKPAAVRSPAQILQWQVLSNTVPA	κ-casein	27	A	P
PPKKNQDKTEIPT	κ-casein	13	T	P
PTTEAVESTV	κ-casein	10	V	P
PKKNQDKTEIPTINTI	κ-casein	16	I	P
ESTVATLEDSPEVIES	κ-casein	16	S	E
QPTTMARHPHPHLSFMAIPPK	κ-casein	21	K	Q
FLPYPYYAKPAAVRSPAQILQWQ	κ-casein	23	Q	F
VALINNQFLPYPYYAKPAAVRSP	κ-casein	23	P	V
KDERFFSDKIAKYIPIQYVLSRYPSYGL	κ-casein	28	L	K
TMARHPHPHLSFMAIPPKKNQDKTEIPTIN	κ-casein	30	N	T
KTEIPTINTIASGEP	κ-casein	15	P	K
QYVLSRYPSYGLN	κ-casein	13	N	Q
FLPYPYYAKPAAVRSPAQILQWQVLS	κ-casein	26	S	F
VESTVATLEDSPEVIESPPEI	κ-casein	21	I	V
HPHLSFMAIPPKKNQDKTEIPTINTIAS	κ-casein	28	S	H
INNQFLPYPYY	κ-casein	11	Y	I
WQVLSNTVPAKS	κ-casein	12	S	W
YGLNYYQQKPVALINNQFLP	κ-casein	20	P	Y
IPTINTIASGEPTSTPTTEAVESTVATL	κ-casein	28	L	I
EQPIRCEKDER	κ-casein	11	R	E
TPTTEAVESTVATLEDSP	κ-casein	18	P	T
TVPAKSCQAQPTTMARHPHPHLSFMAI	κ-casein	27	I	T
PYYAKPAAVRSPAQIL	κ-casein	16	L	P
HPHPHLSFMAIPPKKNQDKTEIPT	κ-casein	24	T	H
VPAKSCQAQPTTMARHPH	κ-casein	18	H	V
MARHPHPHLSFMAIPPKKNQDKTEIPTINTIASGEPTSTPT	κ-casein	41	T	M
INNQFLPYP	κ-casein	9	P	I
SPAQILQ	κ-casein	7	Q	S
TEIPTINT	κ-casein	8	T	T
YPSYGLN	κ-casein	7	N	Y
NNQFLPYP	κ-casein	8	P	N
ESPPEINTV	κ-casein	9	V	E
PIRCEKDERFF	κ-casein	11	F	P
GEPTSTPTTEAVESTVA	κ-casein	17	A	G
SNTVPAKSCQ	κ-casein	10	Q	S
ESPPEINT	κ-casein	8	T	E
TPTTEAVES	κ-casein	9	S	T
TEAVESTVATLEDSPEVI	κ-casein	18	I	T
PSYGLNYYQQKPVALI	κ-casein	16	I	P
TEIPTINTI	κ-casein	9	I	T
SPAQILQW	κ-casein	8	W	S
LPYPYYAKP	κ-casein	9	P	L
HPHPHLS	κ-casein	7	S	H
YQQKPVA	κ-casein	7	A	Y
SPAQILQWQVLSN	κ-casein	13	N	S
VRSPAQILQWQVL	κ-casein	13	L	V
SPAQILQWQ	κ-casein	9	Q	S
QVLSNTVPAKSCQAQPTTMARHPHPHLSFMAIPPKKNQD	κ-casein	39	D	Q
PIRCEKDERFFSD	κ-casein	13	D	P
AVRSPAQ	κ-casein	7	Q	A
PAKSCQAQPTT	κ-casein	11	T	P
AKSCQAQPTT	κ-casein	10	T	A
PAQILQWQVLS	κ-casein	11	S	P
EINTVQVTSTA	κ-casein	11	A	E
IPIQYVLSRYPSYGLNYYQQKPVA	κ-casein	24	A	I
PKKNQDKTEIPTINTIASGEPTSTPTTE	κ-casein	28	E	P
KNQDKTEIPTINTIAS	κ-casein	16	S	K
AQILQWQVLSNTVP	κ-casein	14	P	A
SCQAQPT	κ-casein	7	T	S
FFSDKIA	κ-casein	7	A	F
RFFSDKIAKYIPIQYVLSRYPSY	κ-casein	23	Y	R
EVIESPPEINTVQV	κ-casein	14	V	E
SRYPSYGLNYYQ	κ-casein	12	Q	S
STPTTEAVE	κ-casein	9	E	S
PAQILQWQVLSNTVPAKSCQAQPTT	κ-casein	25	T	P
HPHPHLSFMAIPPKKN	κ-casein	16	N	H
AAVRSPAQIL	κ-casein	10	L	A
NQDKTEIPTINTIASG	κ-casein	16	G	N
PTSTPTTEAVESTVATLE	κ-casein	18	E	P
EPTSTPTTEAVESTVATLEDSPEVIE	κ-casein	26	E	E
HPHLSFMAIPPKKNQDKTEI	κ-casein	20	I	H
VRSPAQILQWQVLSNTVPAKSCQAQPTTMARHPHP	κ-casein	35	P	V
TIASGEPTSTPTTEAVESTVATLEDSPEVIES	κ-casein	32	S	T
EVIESPPEINTVQVTSTA	κ-casein	18	A	E
IESPPEINTV	κ-casein	10	V	I
KPAAVRSPAQILQWQVLSNTVPAKSCQAQPTTMARHPHPHLSFMAIPPKKNQD	κ-casein	53	D	K
PIQYVLSRYPSYGLNYYQQKPVALINNQFLPYPYYAKPAA	κ-casein	40	A	P
PAQILQWQVLSNTVPAKSCQAQPTTMARHPHPHLSFM	κ-casein	37	M	P
FLPYPYYAKPAAVRSPAQ	κ-casein	18	Q	F
NQDKTEIPTINTIASGEPT	κ-casein	19	T	N
QAQPTTMARHPHPHLSFMAIP	κ-casein	21	P	Q
PTTMARHPHPHLSF	κ-casein	14	F	P
YIPIQYVLSRYP	κ-casein	12	P	Y
SPEVIESPPEINT	κ-casein	13	T	S
INTIASGEPT	κ-casein	10	T	I
PYPYYAKPAAVRSPAQILQWQVLSNT	κ-casein	26	T	P
QILQWQVLSNTVPAKSCQAQPTTM	κ-casein	24	M	Q
QWQVLSNTVPAKSCQAQPT	κ-casein	19	T	Q
INTVQVTS	κ-casein	8	S	I
TVATLEDSPEVIESP	κ-casein	15	P	T
NTVPAKSCQAQPTTMARHPHPH	κ-casein	22	H	N
RFFSDKIA	κ-casein	8	A	R
VESTVATLEDSPEVIES	κ-casein	17	S	V
KNQDKTEIPTINTIASGEP	κ-casein	19	P	K
TINTIASGEPTSTPTTEAV	κ-casein	19	V	T
YYAKPAAVRSPAQILQWQV	κ-casein	19	V	Y
NQEQPIRCEKD	κ-casein	11	D	N
PAAVRSPAQILQWQVLSN	κ-casein	18	N	P
EIPTINTIASGEPTSTPTTEAVESTVATLEDSPEVI	κ-casein	36	I	E
LNYYQQKPVALINNQFLPYPYYAKPAAVRSPAQILQWQV	κ-casein	39	V	L
TMARHPHPHLSFMAIPPK	κ-casein	18	K	T
PHLSFMAIPPKKNQDKTEIPTINTIASGEPTSTPTTEAVESTV	κ-casein	43	V	P
LINNQFLPYPYYAKPAAVRSPAQILQWQVLSNTVPAKSCQAQ	κ-casein	42	Q	L
HPHLSFMAIPPKKNQDKTEIP	κ-casein	21	P	H
SPAQILQWQVLSNTVPAKSCQAQPTT	κ-casein	26	T	S
AVRSPAQILQWQVLSNTVPAKSCQ	κ-casein	24	Q	A
ATLEDSPEVIES	κ-casein	12	S	A
HPHLSFMAI	κ-casein	9	I	H
VESTVATLEDS	κ-casein	11	S	V
KKNQDKTEI	κ-casein	9	I	K
QVLSNTVPAKSCQAQPTTMARHPHPHLSFMAIPPKKNQDK	κ-casein	40	K	Q
YPYYAKPAAVRSPAQILQWQVLSNTVPAKSC	κ-casein	31	C	Y
INTIASGEPTSTPTTEAVES	κ-casein	20	S	I
LSNTVPAKSCQAQPTTMARHPHPHLSFMAIPPKKNQDKTEIP	κ-casein	42	P	L
IRCEKDERFFSDKIAK	κ-casein	16	K	I
KYIPIQYVLSRYPSYGLNYYQQKPVALINNQFLPYPY	κ-casein	37	Y	K
EKDERFFSDKIA	κ-casein	12	A	E
TPTTEAVESTVATLEDSPEVIE	κ-casein	22	E	T
PKKNQDKTEIPTINTIASGEPT	κ-casein	22	T	P
WQVLSNTVPAKSCQAQP	κ-casein	17	P	W
TEIPTINTIASGEPTSTPTTEAVESTVATLEDSPEVIES	κ-casein	39	S	T
QPTTMARHPH	κ-casein	10	H	Q
HPHLSFMAIPPKKNQDKTEIPTIN	κ-casein	24	N	H
QDKTEIPTINTIASGEPT	κ-casein	18	T	Q
FMAIPPKKNQDKTEI	κ-casein	15	I	F
PHLSFMAIPPKKNQDK	κ-casein	16	K	P
TEIPTINTIASGEPTSTPTTEAVESTVATLEDSP	κ-casein	34	P	T
RFFSDKIAKYIP	κ-casein	12	P	R
KNQDKTEIPTINTIASGEPTS	κ-casein	21	S	K
EVIESPPEINTVQVTST	κ-casein	17	T	E
TVPAKSCQAQPTTMARHPHPHLSFMAIPPKKNQ	κ-casein	33	Q	T
TINTIASGEPTSTPTT	κ-casein	16	T	T
KKNQDKTEIP	κ-casein	10	P	K
KTEIPTINTIASGEPTSTPTTEAVESTVATLEDSPEVIESP	κ-casein	41	P	K
YPYYAKPAAVRSPAQILQWQVLSNTVPA	κ-casein	28	A	Y
FMAIPPKKNQDKTEIPT	κ-casein	17	T	F
IPPKKNQDKTEIPTINTIASGE	κ-casein	22	E	I
SPPEINTV	κ-casein	8	V	S
PAKSCQAQPTTMARHPHPHLSFM	κ-casein	23	M	P
SDKIAKYIPIQYV	κ-casein	13	V	S
FMAIPPKKNQDKTE	κ-casein	14	E	F
ESPPEINTVQVTST	κ-casein	14	T	E
TEIPTINTIASG	κ-casein	12	G	T
VALINNQFLPYPYYAKPAAVRSPAQILQWQVLSNTVPA	κ-casein	38	A	V
TINTIASGEPTSTPTTEAVESTVATLEDSPEVIESPPE	κ-casein	38	E	T
QAQPTTMARHPHPHLSFMAIPP	κ-casein	22	P	Q
RYPSYGLNYYQQKPVALINNQFLPYPYYAKPAA	κ-casein	33	A	R
STVATLEDSPEVIESPPEINT	κ-casein	21	T	S
VLSNTVPAKSCQAQPTTMAR	κ-casein	20	R	V
TVATLEDSPEVIESPPEINTV	κ-casein	21	V	T
QDKTEIPTINTIA	κ-casein	13	A	Q
KTEIPTINTIASGEPTSTPTTEAVESTV	κ-casein	28	V	K
NTVPAKSCQAQPTTMARHPHPHLSFMAIPPK	κ-casein	31	K	N
PPKKNQDKTEIPTINTIASGEPTSTPTTEAVESTVATLEDSPE	κ-casein	43	E	P
QVLSNTVPAKSCQAQPTTMARH	κ-casein	22	H	Q
PYYAKPAAVRSPAQI	κ-casein	15	I	P
PTTEAVESTVATL	κ-casein	13	L	P
IQYVLSRYPSYGLNYY	κ-casein	16	Y	I
VLSNTVPA	κ-casein	8	A	V
MAIPPKKNQDKTEIPTINTIASGEPTSTPTTEAVESTV	κ-casein	38	V	M
LQWQVLSNTVPAKSCQAQPTTMAR	κ-casein	24	R	L
KSCQAQPTTMARHPHPHLSFMAIPPKKNQDKTEIPTINTI	κ-casein	40	I	K
AIPPKKNQDKTEIPTINTIASGEPTST	κ-casein	27	T	A
AQILQWQVLSNTVPAKSCQA	κ-casein	20	A	A
TVATLEDSPEVIESPPEINTVQVT	κ-casein	24	T	T
IESPPEINTVQ	κ-casein	11	Q	I
YYQQKPVALINN	κ-casein	12	N	Y
VPAKSCQAQPTTMARHPHPHLSFMAIPPKKNQDKTEIPTINTIASGEPTSTPTTE	κ-casein	55	E	V
LSFMAIPPKKNQDKTEI	κ-casein	17	I	L
NTVPAKSCQAQ	κ-casein	11	Q	N
AIPPKKNQDKTEIPTINT	κ-casein	18	T	A
VLSNTVPAKSCQAQP	κ-casein	15	P	V
IPPKKNQDKTEIPTINTIASGEPTSTPTTEAVESTVATLEDSPEVIESPPEI	κ-casein	52	I	I
PPEINTVQ	κ-casein	8	Q	P
QDKTEIPTINTI	κ-casein	12	I	Q
TEAVEST	κ-casein	7	T	T
KIAKYIPIQYVLSRYPSY	κ-casein	18	Y	K
TVPAKSCQAQPTTMARHPHPHLSFMAIPPKKNQD	κ-casein	34	D	T
IQYVLSRYPSYGLN	κ-casein	14	N	I
EIPTINTIASGEPTSTPTTEAVES	κ-casein	24	S	E
MAIPPKKNQDKTEIPTINTIASGEPTST	κ-casein	28	T	M
QWQVLSNTVPAK	κ-casein	12	K	Q
HLSFMAIPPKKNQDKTEIPTINTIASGEPT	κ-casein	30	T	H
TINTIASGEP	κ-casein	10	P	T
AAVRSPAQILQWQVLSNTVPAKSCQAQPTTMARHPH	κ-casein	36	H	A
TEAVESTVATLEDSPE	κ-casein	16	E	T
VLSNTVPAKSCQAQ	κ-casein	14	Q	V
PEVIESPPEI	κ-casein	10	I	P
STPTTEAVESTVATLEDSPEVIESPPEINT	κ-casein	30	T	S
YQQKPVALINNQ	κ-casein	12	Q	Y
FFSDKIAKYIPIQYVLSRYPSYGLNYYQQKPVALINNQFLPYPYYAKPAAV	κ-casein	51	V	F
AQPTTMARHPHPHLSFM	κ-casein	17	M	A
AKYIPIQYVLSRYPSYG	κ-casein	17	G	A
SPPEINTVQ	κ-casein	9	Q	S
PAAVRSPAQILQWQVLSNTVPAKSC	κ-casein	25	C	P
QWQVLSNTVPAKSCQ	κ-casein	15	Q	Q
QVLSNTVPAKSCQA	κ-casein	14	A	Q
QKPVALINNQFLPYPYYAKPAAVRSPAQILQWQVLSNT	κ-casein	38	T	Q
TTEAVESTVATLEDSPEVI	κ-casein	19	I	T
AQILQWQVLSNTVPAKSCQAQP	κ-casein	22	P	A
SNTVPAKSCQA	κ-casein	11	A	S
QPTTMARHPHPHLSFM	κ-casein	16	M	Q
NTIASGEPTSTPTTEAV	κ-casein	17	V	N
EQPIRCEKDERFFSDKIAKYIPIQYVLSRYPSYG	κ-casein	34	G	E
TINTIASGEPTSTPTTEAVE	κ-casein	20	E	T
GEPTSTPTTEAVESTVATLEDSPEVIESPPEIN	κ-casein	33	N	G
NQDKTEIPTINTIASGE	κ-casein	17	E	N
PSYGLNYYQQKPVALINNQF	κ-casein	20	F	P
PEVIESPPEIN	κ-casein	11	N	P
QPTTMARHPHPHLSFMAIPPKKNQDKTEIPTI	κ-casein	32	I	Q
LPYPYYAKPAAVRSPAQILQWQVLSNTVPAKSCQAQPTTMARHPHPH	κ-casein	47	H	L
YVLSRYPSYGLNYYQQKPVALINNQFL	κ-casein	27	L	Y
FFSDKIAKYIPIQYVLSR	κ-casein	18	R	F
HLSFMAIPPKKNQDKTEIPTINTIASGEPTSTPTTEAVEST	κ-casein	41	T	H
VPAKSCQAQPTTMARHPHPHLSFMAI	κ-casein	26	I	V
DKIAKYIPIQYVLSRYPSYGLNYYQQKPVALINNQFLPYPYYAKPAAV	κ-casein	48	V	D
TEAVESTVATLEDSPEVIESPPEINTVQVTSTAV	κ-casein	34	V	T
PAKSCQAQPTTMARHPHP	κ-casein	18	P	P
KYIPIQYVLSRYPS	κ-casein	14	S	K
IASGEPTSTPTTEAVESTVATLEDSPEVIESPPE	κ-casein	34	E	I
DKTEIPTINTIASGEPTSTPTTEAVEST	κ-casein	28	T	D
EQNQEQPIRCEKDE	κ-casein	14	E	E
WQVLSNTVPAKSCQAQPTTMARHPHPHLS	κ-casein	29	S	W
PTTEAVESTVATLEDSPEVIESP	κ-casein	23	P	P
EIPTINTIASGEPTST	κ-casein	16	T	E
QDKTEIPTINTIASGEPTS	κ-casein	19	S	Q
IRCEKDERFFSDKIAKYIPIQYVL	κ-casein	24	L	I
LSFMAIPPKKNQDKTEIP	κ-casein	18	P	L
TVPAKSCQAQPTTMAR	κ-casein	16	R	T
QPTTMARHPHPHLSF	κ-casein	15	F	Q
KIAKYIPIQYVLSRYPSYGLNYYQQKPVALINNQFL	κ-casein	36	L	K
PEVIESPPEINTVQVT	κ-casein	16	T	P
MARHPHPHLSF	κ-casein	11	F	M
VALINNQFLPYPYYAKPAAVRSPAQILQWQVLSNTVPAK	κ-casein	39	K	V
QILQWQVLSNTVP	κ-casein	13	P	Q
SPEVIESPPEINTVQV	κ-casein	16	V	S
VESTVATLEDSPEVIESPPEIN	κ-casein	22	N	V
FMAIPPKKNQDKTEIPTINT	κ-casein	20	T	F
SCQAQPTTMARHPHPHLSFM	κ-casein	20	M	S
PIQYVLSRYPSYGLNY	κ-casein	16	Y	P
AKSCQAQPTTMARHPHPH	κ-casein	18	H	A
LSNTVPAKSCQAQPTTMARHPH	κ-casein	22	H	L
PAQILQWQVLSNTVPAKSCQ	κ-casein	20	Q	P
PTTEAVESTVATLEDSPEVIE	κ-casein	21	E	P
LYQGPIVLNPWDQV	αs2-casein	14	V	L
HYQKALNEINQFYQKFP	αs2-casein	17	P	H
NAVPITPTLN	αs2-casein	10	N	N
LYQGPIVLNPWDQVK	αs2-casein	15	K	L
ALNEINQFYQK	αs2-casein	11	K	A
INQFYQKFPQYLQYLYQGPIVL	αs2-casein	22	L	I
YQGPIVLNPWDQV	αs2-casein	13	V	Y
QGPIVLNPWDQV	αs2-casein	12	V	Q
NEINQFYQKFPQYLQYLYQGPI	αs2-casein	22	I	N
TEEVKITVDDKHYQKALNEINQFYQ	αs2-casein	25	Q	T
ALNEINQFYQ	αs2-casein	10	Q	A
EENSKKTVDMESTEVFTKKT	αs2-casein	20	T	E
LYQGPIVLNPW	αs2-casein	11	W	L
ALNEINQFYQKFPQYLQY	αs2-casein	18	Y	A
LTEEEKNRLN	αs2-casein	10	N	L
PSKENLCSTFCKEVVRNANE	αs2-casein	20	E	P
QGPIVLNPWDQVK	αs2-casein	13	K	Q
VSSSEESIISQET	αs2-casein	13	T	V
ALPQYLKTVYQHQKAMKPWIQPKT	αs2-casein	24	T	A
NAVPITPTLNR	αs2-casein	11	R	N
VKRNAVPITPTLNREQLSTSEENSKKTVD	αs2-casein	29	D	V
YLYQGPIVLNPWDQVKR	αs2-casein	17	R	Y
TPTLNREQLSTSEENSK	αs2-casein	17	K	T
YQGPIVLNPWDQVK	αs2-casein	14	K	Y
ALNEINQFYQKFPQYLQYLYQ	αs2-casein	21	Q	A
SQRYQKFALPQYLKT	αs2-casein	15	T	S
LYQGPIVLNPWDQ	αs2-casein	13	Q	L
TKLTEEEKNRL	αs2-casein	11	L	T
EESIISQETYKQEKNMAIN	αs2-casein	19	N	E
RNAVPITPTLN	αs2-casein	11	N	R
LNEINQFYQKF	αs2-casein	11	F	L
INPSKENLCSTFCKEVVRNANE	αs2-casein	22	E	I
YLYQGPIVLNPWDQV	αs2-casein	15	V	Y
NMAINPSKENL	αs2-casein	11	L	N
EESIISQETYKQEK	αs2-casein	14	K	E
HQKAMKPWIQPKTKVIPYVRYL	αs2-casein	22	L	H
YQKFPQYLQYLYQGP	αs2-casein	15	P	Y
TKLTEEEKNRLNFLKKISQRYQ	αs2-casein	22	Q	T
TLNREQLSTSEENSKKTVD	αs2-casein	19	D	T
DKHYQKALNEINQFYQKF	αs2-casein	18	F	D
PWDQVKRNAVPI	αs2-casein	12	I	P
YLYQGPIVLNPWDQVKRNAVPITPTLNRE	αs2-casein	29	E	Y
EEVKITVDDKHYQKALN	αs2-casein	17	N	E
LSTSEENSKKTVDMESTEVFTKK	αs2-casein	23	K	L
INPSKENLCSTFCKEVV	αs2-casein	17	V	I
MAINPSKENLC	αs2-casein	11	C	M
YLKTVYQHQKAMKPWIQPKT	αs2-casein	20	T	Y
FALPQYLKTVYQHQKAMKPWIQPKTKVIPY	αs2-casein	30	Y	F
KQEKNMAINPS	αs2-casein	11	S	K
GPIVLNPWDQV	αs2-casein	11	V	G
YLYQGPIVLNPWDQVKRNA	αs2-casein	19	A	Y
MESTEVFTKKTKLTEEE	αs2-casein	17	E	M
GPIVLNPWDQVKRNAVPITPTLNREQLSTS	αs2-casein	30	S	G
YKQEKNMAINPSKENLCSTFCK	αs2-casein	22	K	Y
PWIQPKTKVIPYVRY	αs2-casein	15	Y	P
TEVFTKKTKLTEEEKNRLNFLKKISQRYQK	αs2-casein	30	K	T
ATEEVKITVDDKHYQKALNEIN	αs2-casein	22	N	A
YQKFALPQYLKTVYQ	αs2-casein	15	Q	Y
QETYKQEKNMAINPSK	αs2-casein	16	K	Q
HVSSSEESIISQETYK	αs2-casein	16	K	H
TFCKEVVRNANE	αs2-casein	12	E	T
LNPWDQVKRNAV	αs2-casein	12	V	L
VKRNAVPITPTLNREQLSTSEENSKKTV	αs2-casein	28	V	V
KNMAINPSKENLCSTFCKEVV	αs2-casein	21	V	K
KEVVRNANEEEYSIGSSSEESAEVATEEV	αs2-casein	29	V	K
PWDQVKRNAVPITPTLNR	αs2-casein	18	R	P
DQVKRNAVPITPTLNREQLSTS	αs2-casein	22	S	D
NAVPITPT	αs2-casein	8	T	N
PQYLKTVYQHQKAMKPWIQPKTKVIPYVRY	αs2-casein	30	Y	P
ALNEINQ	αs2-casein	7	Q	A
QGPIVLN	αs2-casein	7	N	Q
ITVDDKHYQ	αs2-casein	9	Q	I
TMEHVSSSEESIISQETYKQEKNMA	αs2-casein	25	A	T
LTEEEKN	αs2-casein	7	N	L
NMAINPS	αs2-casein	7	S	N
ALNEINQF	αs2-casein	8	F	A
NMAINPSK	αs2-casein	8	K	N
KHYQKALNEINQFYQKFPQ	αs2-casein	19	Q	K
KITVDDKHYQKALNEINQFYQK	αs2-casein	22	K	K
ATEEVKITVDDKHY	αs2-casein	14	Y	A
DDKHYQKALNEINQFYQKFPQYLQYLYQGPIVLN	αs2-casein	34	N	D
ITVDDKH	αs2-casein	7	H	I
NANEEEY	αs2-casein	7	Y	N
SQRYQKFALPQYL	αs2-casein	13	L	S
QGPIVLNPWDQVKRNAV	αs2-casein	17	V	Q
TKLTEEEK	αs2-casein	8	K	T
TKLTEEEKN	αs2-casein	9	N	T
ITVDDKHY	αs2-casein	8	Y	I
TPTLNREQ	αs2-casein	8	Q	T
KNMAINPSKENLCSTFCKEV	αs2-casein	20	V	K
KKTKLTEEEKNRLN	αs2-casein	14	N	K
LYQGPIVL	αs2-casein	8	L	L
KNMAINPSKENLCSTFCKEVVRNANE	αs2-casein	26	E	K
NRLNFLKKISQRYQKFAL	αs2-casein	18	L	N
EINQFYQKF	αs2-casein	9	F	E
EQLSTSEENSKKTVD	αs2-casein	15	D	E
QFYQKFPQY	αs2-casein	9	Y	Q
PITPTLN	αs2-casein	7	N	P
KENLCSTFCKEVVRNANEEEYSIGSSSEESAEVATEEVKITVDDKH	αs2-casein	46	H	K
PTLNREQL	αs2-casein	8	L	P
KITVDDKHYQKALNEINQF	αs2-casein	19	F	K
LYQGPIV	αs2-casein	7	V	L
KITVDDK	αs2-casein	7	K	K
PTLNREQLSTSEENSKKTVDMESTEVFTKKTKLTEEEKN	αs2-casein	39	N	P
PITPTLNREQLSTSEENS	αs2-casein	18	S	P
SSSEESIISQETYKQEKNM	αs2-casein	19	M	S
LYQGPIVLNPWDQVKRNAVP	αs2-casein	20	P	L
ETYKQEKNMAINPSKENLCSTFCK	αs2-casein	24	K	E
TFCKEVVRNANEEEYSIG	αs2-casein	18	G	T
PSKENLCS	αs2-casein	8	S	P
NEINQFYQKFPQYLQYLYQGPIVLN	αs2-casein	25	N	N
KQEKNMAINPSK	αs2-casein	12	K	K
ISQETYKQEKNMAINPSKENLCS	αs2-casein	23	S	I
VLNPWDQVKRN	αs2-casein	11	N	V
WDQVKRNAVPITPTLNREQLSTSEENSKKT	αs2-casein	30	T	W
QETYKQEKNMAINPSKENLC	αs2-casein	20	C	Q
LQYLYQGPIV	αs2-casein	10	V	L
IISQETYKQEKNMAINPSKENLCST	αs2-casein	25	T	I
NPWDQVKRNAVPITPTLNRE	αs2-casein	20	E	N
ESIISQE	αs2-casein	7	E	E
STEVFTKKTKLTEEEKNRL	αs2-casein	19	L	S
VDDKHYQ	αs2-casein	7	Q	V
PTLNREQLSTSEENSK	αs2-casein	16	K	P
SKENLCSTFCKEVVRNANE	αs2-casein	19	E	S
EQLSTSEENSKKTVDMESTEVFTKKT	αs2-casein	26	T	E
KLTEEEKNRL	αs2-casein	10	L	K
DDKHYQKALNEINQ	αs2-casein	14	Q	D
TEEEKNRLNFLKKISQRY	αs2-casein	18	Y	T
VLNPWDQVKRNAVPITPTLNREQLS	αs2-casein	25	S	V
VATEEVKITVDDKHYQKALNEINQFYQK	αs2-casein	28	K	V
PITPTLNREQLSTSEENSKK	αs2-casein	20	K	P
FPQYLQYLYQGPIVLNPWDQVKRNAVPI	αs2-casein	28	I	F
HVSSSEESII	αs2-casein	10	I	H
YQKALNEINQFYQK	αs2-casein	14	K	Y
FALPQYLKTVYQHQKAMKPWIQP	αs2-casein	23	P	F
YQKFPQYLQYLYQGPIVLNPWDQVKR	αs2-casein	26	R	Y
ATEEVKITVDDKHYQKALNE	αs2-casein	20	E	A
PTLNREQLSTSEENSKKTVD	αs2-casein	20	D	P
KLTEEEKNRLNFLK	αs2-casein	14	K	K
SIISQETYKQ	αs2-casein	10	Q	S
NPSKENLCSTFCKEV	αs2-casein	15	V	N
KQEKNMAINPSKE	αs2-casein	13	E	K
SIISQETYKQEKNMA	αs2-casein	15	A	S
LTEEEKNRLNFLKKISQRYQK	αs2-casein	21	K	L
LCSTFCKEVVRNANEE	αs2-casein	16	E	L
ESAEVATEEVKITVDDKHYQK	αs2-casein	21	K	E
VFTKKTKLTEEEKNRLNFLKKISQRYQK	αs2-casein	28	K	V
TVDDKHYQKALN	αs2-casein	12	N	T
PITPTLNREQLST	αs2-casein	13	T	P
TVDDKHY	αs2-casein	7	Y	T
INPSKENLCSTFCKEVVRNA	αs2-casein	20	A	I
VATEEVKITVDDKHYQKALNEINQFYQKFPQ	αs2-casein	31	Q	V
GPIVLNPWDQVKRNAVP	αs2-casein	17	P	G
DKHYQKALNE	αs2-casein	10	E	D
TYKQEKNMAINPSKENLCST	αs2-casein	20	T	T
NLCSTFCKEVV	αs2-casein	11	V	N
KLTEEEKNRLNFL	αs2-casein	13	L	K
NREQLSTSEENSKKTVDMESTEVFTKKTKLTEEEKNRLNFLK	αs2-casein	42	K	N
PQYLKTVYQHQKAMKPWIQPKTKVIPYV	αs2-casein	28	V	P
EVATEEVKITVDDKHYQK	αs2-casein	18	K	E
NREQLSTS	αs2-casein	8	S	N
ENSKKTVDMESTEVFTKKT	αs2-casein	19	T	E
FPQYLQYLYQGPIVLNPWD	αs2-casein	19	D	F
REQLSTSEENSKKTVDMESTEVFTKKTK	αs2-casein	28	K	R
REQLSTSEEN	αs2-casein	10	N	R
KQEKNMAINPSKENLCSTFCKEVVRNANE	αs2-casein	29	E	K
KQEKNMAINPSKENLCSTFCKEVVRNANEEEYSI	αs2-casein	34	I	K
VLNPWDQVKRNAVPITPTLNREQLSTSEENSKKTVDMESTEVFTKKTKLTEEEKN	αs2-casein	55	N	V
SQRYQKFALPQYLKTVYQHQK	αs2-casein	21	K	S
VKRNAVPITPTLNREQLSTSEENSKK	αs2-casein	26	K	V
VPITPTLNREQLSTSEEN	αs2-casein	18	N	V
INPSKENLCSTFCKEVVRNANEEEYSIGSS	αs2-casein	30	S	I
ISQRYQKFALPQYLKTVYQ	αs2-casein	19	Q	I
KQEKNMAINPSKENLC	αs2-casein	16	C	K
QKALNEINQFYQ	αs2-casein	12	Q	Q
QFYQKFPQYLQYLYQGPI	αs2-casein	18	I	Q
MAINPSKENLCSTFCKEVVR	αs2-casein	20	R	M
DKHYQKALNEINQFYQK	αs2-casein	17	K	D
EVKITVDDKHYQ	αs2-casein	12	Q	E
TLNREQLST	αs2-casein	9	T	T
TSEENSKKTV	αs2-casein	10	V	T
DDKHYQKALNEINQFYQK	αs2-casein	18	K	D
WDQVKRNAVPITPTLNREQLSTSEEN	αs2-casein	26	N	W
MESTEVFTKKTKLTEEEKNRLNFLKKISQRYQ	αs2-casein	32	Q	M
KNTMEHVSS	αs2-casein	9	S	K
IVLNPWDQVKRNAVPITPTLNREQLS	αs2-casein	26	S	I
LNEINQF	αs2-casein	7	F	L
KHYQKALNEINQFYQKFP	αs2-casein	18	P	K
EVKITVDDKHYQKAL	αs2-casein	15	L	E
ENSKKTVDMESTEVFTKKTKLTEEEKNRLNFLKKI	αs2-casein	35	I	E
VATEEVKITVDDKHYQK	αs2-casein	17	K	V
DQVKRNAVPITPTLNREQLSTSEENSKKTVDMES	αs2-casein	34	S	D
FPQYLQYLYQGPIVLN	αs2-casein	16	N	F
LSTSEENSKK	αs2-casein	10	K	L
QETYKQEKNMAINPSKENLCSTFC	αs2-casein	24	C	Q
DKHYQKALNEINQFYQKFPQYLQYLYQGPIV	αs2-casein	31	V	D
VLNPWDQVKRNAVPITPTLNREQLSTSEENSKK	αs2-casein	33	K	V
PTLNREQLSTSEENSKKTV	αs2-casein	19	V	P
EEVKITVDDKHYQKALNEINQFYQKFP	αs2-casein	27	P	E
TVYQHQKAMKPW	αs2-casein	12	W	T
TEVFTKKTKLTE	αs2-casein	12	E	T
LQYLYQGPIVLNPWDQVKRNAVPITPTL	αs2-casein	28	L	L
EINQFYQKFPQYLQ	αs2-casein	14	Q	E
YLQYLYQGPIVLNPWDQVKRNA	αs2-casein	22	A	Y
LNREQLSTSE	αs2-casein	10	E	L
SEENSKKTVDMESTEVFTK	αs2-casein	19	K	S
NEINQFYQKFPQYLQYLYQGPIVL	αs2-casein	24	L	N
PIVLNPWDQVKRNAVPITPTLNREQLSTSEENSKKTVDMES	αs2-casein	41	S	P
NMAINPSKE	αs2-casein	9	E	N
KTVYQHQKA	αs2-casein	9	A	K
YLYQGPIVLNPWDQVKRNAVPIT	αs2-casein	23	T	Y
ITPTLNREQLSTSEENS	αs2-casein	17	S	I
ITVDDKHYQKALNEI	αs2-casein	15	I	I
LNPWDQVKRNAVPITPTLNREQLSTSEENSKKTVDMES	αs2-casein	38	S	L
ESIISQETYKQEKNMAINP	αs2-casein	19	P	E
ESAEVATEEVKITVDDKHYQKALNEINQF	αs2-casein	29	F	E
VVRNANEEEYSIGSSSEES	αs2-casein	19	S	V
NPSKENLCSTFCKEVVRNANEEEYSIGSSSEESAEVA	αs2-casein	37	A	N
VLNPWDQVKRNAVPITPTLNREQLSTSEENS	αs2-casein	31	S	V
SQRYQKFALPQYLKTVYQHQKAMKPWIQPK	αs2-casein	30	K	S
VPITPTLNREQLSTSE	αs2-casein	16	E	V
PQYLKTVYQHQKAMK	αs2-casein	15	K	P
KALNEINQFYQKFPQYL	αs2-casein	17	L	K
ALPQYLKTVYQHQKAMKPWI	αs2-casein	20	I	A
MESTEVFTKKTKLTEEEKNRLNFLKKISQ	αs2-casein	29	Q	M
SEESIISQETYKQEKN	αs2-casein	16	N	S
YLQYLYQGPI	αs2-casein	10	I	Y
HYQKALNEINQFYQKFPQ	αs2-casein	18	Q	H
SIISQETYKQEKNMAINPSKENLCSTFCKEVV	αs2-casein	32	V	S
MAINPSKENLCSTFCKEV	αs2-casein	18	V	M
SSEESIISQETYKQEKNMAIN	αs2-casein	21	N	S
QKALNEINQFYQKFPQY	αs2-casein	17	Y	Q
FTKKTKLTEEEKNRLNFLKKISQRYQKFALPQYLKT	αs2-casein	36	T	F
NANEEEYSIGSSSEESAEVATEEVKITVDDKHYQKALNEINQFYQK	αs2-casein	46	K	N
QKFPQYLQYLYQGPI	αs2-casein	15	I	Q
TVDDKHYQKALNEINQ	αs2-casein	16	Q	T
KEVVRNANEEEYSIG	αs2-casein	15	G	K
KTVYQHQKAMKPWIQ	αs2-casein	15	Q	K
ATEEVKITVDDKHYQK	αs2-casein	16	K	A
YLKTVYQHQKAMKPWIQPKTKVIPY	αs2-casein	25	Y	Y
MEHVSSSEESIISQETYKQEKNMAINPSKENLCSTFCK	αs2-casein	38	K	M
YKQEKNMAINPS	αs2-casein	12	S	Y
ATEEVKITVDDKHYQKA	αs2-casein	17	A	A
TKLTEEEKNRLNFLKKISQRYQKFALPQYLKTVY	αs2-casein	34	Y	T
LTEEEKNRLNFL	αs2-casein	12	L	L
SSSEESIISQETYKQEKNMAINPSKENLCSTFCKEVVRN	αs2-casein	39	N	S
TKLTEEEKNRLN	αs2-casein	12	N	T
STEVFTKKTKLTEEEKNRLNFLKKISQRYQKFALPQYLKTVYQHQKAMKPWIQP	αs2-casein	54	P	S
QKALNEINQFYQKFP	αs2-casein	15	P	Q
EESAEVATEEVKIT	αs2-casein	14	T	E
ITPTLNREQLSTSEENSKKT	αs2-casein	20	T	I
KNTMEHVSSSEESIISQETY	αs2-casein	20	Y	K
SSSEESAEVATEEVKITVDDKHYQ	αs2-casein	24	Q	S
VDDKHYQKALNEI	αs2-casein	13	I	V
SSEESIISQETYKQEKNMAINPSK	αs2-casein	24	K	S
AINPSKENLCSTFCKEV	αs2-casein	17	V	A
NFLKKISQRYQKFALPQYLKTVYQHQKAMKPWIQPKTKVI	αs2-casein	40	I	N
KISQRYQKFALPQYLKTVYQHQKAM	αs2-casein	25	M	K
TPTLNREQLSTSEENSKKT	αs2-casein	19	T	T
VFTKKTKLTEEEKNRL	αs2-casein	16	L	V
QKALNEINQFYQKFPQ	αs2-casein	16	Q	Q
AINPSKENLC	αs2-casein	10	C	A
SEENSKKTVDMESTEVFTKKTKLT	αs2-casein	24	T	S
RNANEEEYSIGSSSEE	αs2-casein	16	E	R
QETYKQEKNMAINP	αs2-casein	14	P	Q
REQLSTSEENSKKT	αs2-casein	14	T	R
SQRYQKFALPQYLKTVYQHQKAM	αs2-casein	23	M	S
ANEEEYSIGSSSEESAEVATEEVKITVDDKHYQKALNEIN	αs2-casein	40	N	A
WDQVKRNAVPITPTLNREQ	αs2-casein	19	Q	W
FTKKTKLTEEEKNRLN	αs2-casein	16	N	F
QYLKTVYQHQKAMKPWI	αs2-casein	17	I	Q
AVPITPTLNREQLSTSE	αs2-casein	17	E	A
TVDMESTEVFTKKTKLTEEEKNRLNFLKKISQRYQKFALPQYLKTVYQH	αs2-casein	49	H	T
DKHYQKALNEINQFYQKFPQYL	αs2-casein	22	L	D
NPSKENLCSTFCKEVVRNAN	αs2-casein	20	N	N
EINQFYQKFPQYLQYLYQGPIVLNPWDQVKRNAVPITPTLNR	αs2-casein	42	R	E
HVSSSEESIISQET	αs2-casein	14	T	H
AINPSKENLCSTFCK	αs2-casein	15	K	A
SSEESIISQETYKQEKNMAI	αs2-casein	20	I	S

## Sheet: CPP L
CPP L	Protein	Peptide length	Amino acid at C-terminal	Amino acid at N-terminal
HQGLPQEVLNENLLR	αs1-casein	15	R	H
FFVAPFPEVFGK	αs1-casein	12	K	F
TDAPSFSDIPNPIGSENSEK	αs1-casein	20	K	T
YLGYLEQLLR	αs1-casein	10	R	Y
FVAPFPEVFGK	αs1-casein	11	K	F
APSFSDIPNPIGSENSEK	αs1-casein	18	K	A
VAPFPEVFGK	αs1-casein	10	K	V
YQLDAYPSGAWYYVPL	αs1-casein	16	L	Y
EGIHAQQKEPMIGVNQELAYFYPELFR	αs1-casein	27	R	E
FFVAPFPEVF	αs1-casein	10	F	F
VPQLEIVPNSAEER	αs1-casein	14	R	V
EPMIGVNQELAYF	αs1-casein	13	F	E
QLDAYPSGAWY	αs1-casein	11	Y	Q
IGVNQELAYFYPELFR	αs1-casein	16	R	I
MEDIKQMEAESISSSEEIVPNSVEQK	αs1-casein	26	K	M
ESISSSEEIVPNSVEQKHIQKED	αs1-casein	23	D	E
AMEDIKQMEAESISSSEEI	αs1-casein	19	I	A
PNPIGSENSEK	αs1-casein	11	K	P
YVPLGTQYTDAPSFSDIPNPIGSENSEK	αs1-casein	28	K	Y
EDVPSER	αs1-casein	7	R	E
SAEERLHSMKEGIHAQQKEPMIGVNQELAYFYPELFRQFYQLDAYP	αs1-casein	46	P	S
YKVPQLEIVPNSAEER	αs1-casein	16	R	Y
YVPLGTQY	αs1-casein	8	Y	Y
FYQLDAYPSGAWYYVPLGTQYTDAP	αs1-casein	25	P	F
KDIGSESTEDQAMEDIKQMEAESI	αs1-casein	24	I	K
FYPELFRQFYQLDAYPSGAWYYVPLGTQYTDAPSFSDIPNPIGSENSEKTTMP	αs1-casein	53	P	F
EGIHAQQK	αs1-casein	8	K	E
PFPEVFGKEKVNELSKDIGSESTEDQAMEDIKQMEAESISSSEEIVPNSVEQKH	αs1-casein	54	H	P
MEDIKQMEAESISSSEEIVPNSVEQKHIQKEDVP	αs1-casein	34	P	M
EDIKQMEAESISSSEEIVPNSVEQK	αs1-casein	25	K	E
ELFRQFYQLDAYPSGAWYY	αs1-casein	19	Y	E
LGYLEQLLR	αs1-casein	9	R	L
VPLGTQYTDAPSFSDIPNPIGSENSEK	αs1-casein	27	K	V
AYFYPELFRQFYQLDAYPSGAWYYVPLGTQYTDAPSFSDIPNPIGSENSEKT	αs1-casein	52	T	A
EDQAMEDIKQME	αs1-casein	12	E	E
EGIHAQQKEPMIGVNQELAYF	αs1-casein	21	F	E
QELAYFYPELFRQFYQLDAYPSGAWYYVPLGTQYTDAPSFSDIPNPIGSEN	αs1-casein	51	N	Q
PFPEVFGK	αs1-casein	8	K	P
NSAEERLHSMKEGIHAQQKEPMIGVNQELAYFYPELFRQF	αs1-casein	40	F	N
FRQFYQLDAYPSGAWYYVPLGTQYTDAP	αs1-casein	28	P	F
SMKEGIHAQQKEPMIGVNQELAYFYPELFRQFYQLDAYPSGAWYYVPLGTQY	αs1-casein	52	Y	S
VPLGTQYTDAPSFSDIPNPIGSENSE	αs1-casein	26	E	V
HSMKEGIHAQQKEPMIGVNQELAYFY	αs1-casein	26	Y	H
EIVPNSAEERLHSMKEGIHAQQKEPMIGVNQELAYFYPELFRQFYQLDAYP	αs1-casein	51	P	E
WYYVPLGTQYTDAPSFSDIPNPIGSENSEKTT	αs1-casein	32	T	W
IKHQGLPQEVLNENLLRFFVAPFPEVFGKEKVNELSKDIG	αs1-casein	40	G	I
VPSERYLGYLEQLLRLKKYKVPQLEIVPNSAEERLHSMKEG	αs1-casein	41	G	V
FPEVFGKEKVNELSKDIGSESTEDQAMEDIKQMEAESIS	αs1-casein	39	S	F
TQYTDAPSFSDIPNPIGSENSEKTTMPL	αs1-casein	28	L	T
APFPEVFGK	αs1-casein	9	K	A
EPMIGVNQELAYFYPELFRQFYQLDAYPSGAWYYVPLGTQYTDAPSFS	αs1-casein	48	S	E
GTQYTDAPSFSDIPNPIGSENSEKTTMP	αs1-casein	28	P	G
AEERLHSMKEGIHAQQKEPMIGVNQELAYFYPELFRQFYQLDAYPSGA	αs1-casein	48	A	A
QLDAYPSGAWYYVPLGTQYTDAPSFSDIPNPIGSENSEKTTM	αs1-casein	42	M	Q
GIHAQQK	αs1-casein	7	K	G
TEDQAMEDIKQMEAESISS	αs1-casein	19	S	T
VNQELAYFYPELFRQFYQLDAYPSGAWYYVPLGTQYTDAPSFSDI	αs1-casein	45	I	V
LNENLLRFFVAPFPEVFGKEKVNELSKDIGSESTEDQAMEDIKQMEAESISSS	αs1-casein	53	S	L
APSFSDIPNPIGSENSEKTTMPLW	αs1-casein	24	W	A
YPELFRQFYQLDAYPSGAWYYVPLGTQYTD	αs1-casein	30	D	Y
YVPLGTQYTDAPSFSDIPNPIGSENSEKTTM	αs1-casein	31	M	Y
QLDAYPSGAWYYVPLGTQYTDAPSFSDIPNP	αs1-casein	31	P	Q
MEDIKQMEAESISSSEEIVPNSVE	αs1-casein	24	E	M
IGSESTEDQAMEDIKQME	αs1-casein	18	E	I
KEKVNELSKDIGSESTEDQAMEDIKQMEAESISSSEEIVPNSVE	αs1-casein	44	E	K
PQEVLNENLLR	αs1-casein	11	R	P
IGSESTEDQAMEDIKQMEA	αs1-casein	19	A	I
TESQSLTLTDVENLHLPLPL	β-casein	20	L	T
LLYQEPVLGPVR	β-casein	12	R	L
LYQEPVLGPVR	β-casein	11	R	L
SLTLTDVENLHLPLPL	β-casein	16	L	S
TLTDVENLHLPLPL	β-casein	14	L	T
FQSEEQQQTEDELQDK	β-casein	16	K	F
YQEPVLGPVR	β-casein	10	R	Y
YPVEPFTESQ	β-casein	10	Q	Y
DVENLHLPLPL	β-casein	11	L	D
AQTQSLVYPFPGPIPN	β-casein	16	N	A
QQTEDELQDK	β-casein	10	K	Q
GPFPIIV	β-casein	7	V	G
DMPIQAF	β-casein	7	F	D
YPVEPFTESQSLTLTDVENLHLPLPL	β-casein	26	L	Y
DMPIQAFL	β-casein	8	L	D
TESQSLTLTDVENLHLPLPLLQSWMHQPHQPLPPTVMFPPQSVL	β-casein	44	L	T
LTQTPVV	β-casein	7	V	L
VLPVPQK	β-casein	7	K	V
SLPQNIPPLTQTPVVVPPFLQPEVM	β-casein	25	M	S
SLPQNIPPLTQTPVVVPPFLQPEVMGVSK	β-casein	29	K	S
AQTQSLVYPFPGPIPNSLPQNIPPLTQTPVVVPPFLQPEVMGVSK	β-casein	45	K	A
AQTQSLVYPFPGPIPNSLPQNIPPLTQTPVVVPPFLQPEVM	β-casein	41	M	A
AVPYPQR	β-casein	7	R	A
IHPFAQTQSLVYPFPGPIPNSLPQNIPPLTQTPVVVPPFLQPEVMGVSK	β-casein	49	K	I
SLVYPFPGPIPNSLPQNIPPLTQTPVVVPPFLQPEVMGVSK	β-casein	41	K	S
FQSEEQQQTEDELQDKIHPF	β-casein	20	F	F
FTESQSLTLTDVENLH	β-casein	16	H	F
VVPPFLQPEVMGVSKVKEAMAPKHKEM	β-casein	27	M	V
ELQDKIHPFAQTQSLV	β-casein	16	V	E
QSLTLTDVENLHLPLPLLQSWM	β-casein	22	M	Q
ELEELNVPGEIVESLSSSEES	β-casein	21	S	E
SLSQSKVLPVPQK	β-casein	13	K	S
LPLPLLQSWMHQPHQPLPPTVMFPPQSVLSLSQSKVLPVPQKAVPYPQRDMPI	β-casein	53	I	L
QSEEQQQTEDELQDKIHPFAQTQSLVYP	β-casein	28	P	Q
IHPFAQTQ	β-casein	8	Q	I
SLPQNIPPLTQTPVVVPPFLQPEVMGV	β-casein	27	V	S
LTDVENL	β-casein	7	L	L
TEDELQDK	β-casein	8	K	T
KIEKFQSEEQQQTEDELQDKIHPFAQTQSLVYPFPGPIPN	β-casein	40	N	K
QDKIHPFAQTQSL	β-casein	13	L	Q
QSEEQQQ	β-casein	7	Q	Q
VENLHLPLPLLQSWMHQPHQPLP	β-casein	23	P	V
EAMAPKHKEMPFPKYPVEPFTESQS	β-casein	25	S	E
EELNVPGEIVESLSSSE	β-casein	17	E	E
NAVPITPTLNR	αs2-casein	11	R	N
ALNEINQFYQK	αs2-casein	11	K	A
LYQGPIVLNPWDQVK	αs2-casein	15	K	L
KENLCSTFCKEVVRNANEEEYSIGSSSE	αs2-casein	28	E	K
EVVRNANEEEYSIGSSSEESAEVATEE	αs2-casein	27	E	E
NTMEHVSSSEESIISQETYKQE	αs2-casein	22	E	N
FALPQYLK	αs2-casein	8	K	F
NANEEEY	αs2-casein	7	Y	N
KITVDDKHYQKALNEINQFYQKFPQYLQYLYQGPIVLNPWDQVKRNAV	αs2-casein	48	V	K
PSKENLCSTFCKEVVRNANEEEYSIGSSSEESAE	αs2-casein	34	E	P
NTMEHVSSSEESIISQETYKQEKNMAINPSKE	αs2-casein	32	E	N
SKENLCSTFCKEVVRNANEEEYSIGSSSEESAEVATEEVKITVDDKHYQKALNE	αs2-casein	54	E	S
TFCKEVVRNANEEEYSIGSSSEESAEVATEEVKITVDDKHYQKALNEINQFYQK	αs2-casein	54	K	T
NMAINPSK	αs2-casein	8	K	N
TFCKEVVRNANEEEYSIGSSSEESAEVA	αs2-casein	28	A	T
SSEESIISQETYKQEKNMAINPSKENLCSTFCKEV	αs2-casein	35	V	S
LTEEEKNR	αs2-casein	8	R	L
SAEVATEEVKITVDD	αs2-casein	15	D	S
SIGSSSEESAEVATEEVKITVDDKHYQKALNEINQFYQKFPQYLQY	αs2-casein	46	Y	S
NLCSTFCKEVVRNANEEEYSIGSSSEE	αs2-casein	27	E	N
NREQLSTSEENSKKTVDMESTEVF	αs2-casein	24	F	N
SIISQETYKQEKNMAINPSKENLCSTFCKEVVRNANEEEYSIGSSSEESAEVATE	αs2-casein	55	E	S
TYKQEKNMAINPSKENLCSTFCKEVVRNANEEEYSIGSS	αs2-casein	39	S	T
DKHYQKALNEIN	αs2-casein	12	N	D
INPSKENLCSTFCKEVV	αs2-casein	17	V	I
QYLQYLYQGPIVLNPWDQVKRNAVPITPTLNREQLSTSEENSKKTVDMESTE	αs2-casein	52	E	Q
KEVVRNANEEEYSIGSSSEESAEVATEEV	αs2-casein	29	V	K
TEEEKNR	αs2-casein	7	R	T
QEKNMAINPSKENLCSTFCKEVVRN	αs2-casein	25	N	Q
RNANEEEYSIGSSSEE	αs2-casein	16	E	R
SSSEESAEVATEEVKITVDDKHYQ	αs2-casein	24	Q	S
NREQLSTSEENSKKTVDMEST	αs2-casein	21	T	N
PSKENLCSTFCKEVVRNANEEEYSIGSSSE	αs2-casein	30	E	P
KNTMEHVSSSEESIISQETYKQEKN	αs2-casein	25	N	K
HYQKALNEINQFYQKFPQYL	αs2-casein	20	L	H
NMAINPSKENLCSTFCKEVVRNAN	αs2-casein	24	N	N
VVRNANEEEYSIGSSSEESAEVATE	αs2-casein	25	E	V
EHVSSSEESIISQETYKQEKNMAINPS	αs2-casein	27	S	E
SPAQILQWQVL	κ-casein	11	L	S
RFFSDKIAKYIPIQYVLSRYPS	κ-casein	22	S	R
AQPTTMARHPHPHLSFMAIPPKKNQDKTEIPTINTIASGEPTSTPTTEAVEST	κ-casein	53	T	A
AQILQWQVL	κ-casein	9	L	A
SNTVPAK	κ-casein	7	K	S
TLEDSPEVIESPPEINTVQV	κ-casein	20	V	T
QPIRCEKDERFFSDKIAKYIPI	κ-casein	22	I	Q
PAKSCQAQPTTMARHPHPHLSFMAIPPKKNQDKTEIPTINTIASGEPTSTP	κ-casein	51	P	P
NQEQPIRCEKDERFFSDK	κ-casein	18	K	N
LSNTVPAKSCQAQPTTMARHPHPHLS	κ-casein	26	S	L
QPTTMARHPHPHLSFMAIPPKKNQDKTEIPTINTIASGEPTSTPTTEAVES	κ-casein	51	S	Q
TTMARHPHPHLSFMAIPPKKNQDKTEIPTINTIASGEPTSTPTTEAVESTVATLEDS	κ-casein	57	S	T

## Sheet: CPP T
CPP T	Protein	Peptide length	Amino acid at C-terminal	Amino acid at N-terminal
DMPIQAFLLYQEPVLGPVRGPFPIIV	β-casein	26	V	D
LLYQEPVLGPVRGPFPIIV	β-casein	19	V	L
HKEMPFPKYPVEPF	β-casein	14	F	H
FLLYQEPVLGPVRGPFPIIV	β-casein	20	V	F
TESQSLTLTDVENLHLPLPL	β-casein	20	L	T
AVPYPQRDMPIQA	β-casein	13	A	A
EMPFPKYPVEPF	β-casein	12	F	E
LYQEPVLGPVRGPFPIIV	β-casein	18	V	L
VLPVPQKAVPYPQ	β-casein	13	Q	V
SLPQNIPPLTQTPVVVPPFLQPEVMGVSK	β-casein	29	K	S
TLTDVENLHLPLPL	β-casein	14	L	T
RDMPIQAFLLYQEPVLGPVRGPFPIIV	β-casein	27	V	R
YPVEPFTESQSLTLTDVENLHLPLPL	β-casein	26	L	Y
SLPQNIPPLTQTPVVVPPFLQPEVMGV	β-casein	27	V	S
SLTLTDVENLHLPLPL	β-casein	16	L	S
HKEMPFPKYPVEPFTESQ	β-casein	18	Q	H
DVENLHLPLPL	β-casein	11	L	D
MHQPHQPLPPTVMFPPQSVLSLSQSK	β-casein	26	K	M
SLPQNIPPLTQTPVVVPPFLQPEVMGVSKV	β-casein	30	V	S
VLPVPQKAVPYPQRDMPIQA	β-casein	20	A	V
AVPYPQRDMPIQAF	β-casein	14	F	A
FQSEEQQQTEDELQDKIHPF	β-casein	20	F	F
RELEELNVPGEI	β-casein	12	I	R
LLYQEPVLGPVRGPFPI	β-casein	17	I	L
SLPQNIPPLTQTPVVVPPFLQPEVMGVS	β-casein	28	S	S
DMPIQAFLLYQEPVLGPVRGPFPII	β-casein	25	I	D
YQEPVLGPVRGPFPIIV	β-casein	17	V	Y
MPIQAFLLYQEPVLGPVRGPFPIIV	β-casein	25	V	M
QSLTLTDVENLHLPLPLLQSWM	β-casein	22	M	Q
LLYQEPVLGPVRGPFPII	β-casein	18	I	L
FLLYQEPVLGPVRGPFPI	β-casein	18	I	F
HKEMPFPKYPVEPFTESQSL	β-casein	20	L	H
SLSQSKVLPVPQ	β-casein	12	Q	S
NIPPLTQTPVVVPPFLQPEVMGVSK	β-casein	25	K	N
SLVYPFPGPIPN	β-casein	12	N	S
LQSWMHQPHQPLPPTVMFPPQSVL	β-casein	24	L	L
EESITRINKKIEKFQSEEQQQTEDELQDKI	β-casein	30	I	E
EMPFPKYPVEPFTESQ	β-casein	16	Q	E
AQTQSLVYPFPGPIPN	β-casein	16	N	A
TDVENLHLPLPL	β-casein	12	L	T
YPVEPFTESQSLTLTDVENLHLPLPLLQS	β-casein	29	S	Y
TEDELQDKIHPF	β-casein	12	F	T
SLPQNIPPLTQTPVVVPPFLQPEV	β-casein	24	V	S
YPVEPFTESQ	β-casein	10	Q	Y
MHQPHQPLPPTVMFPPQSVLSLSQS	β-casein	25	S	M
VLPVPQKAVPYPQRDMPIQAF	β-casein	21	F	V
SLSQSKVLPVPQK	β-casein	13	K	S
LQSWMHQPHQPLPPTVMFPPQSV	β-casein	23	V	L
INKKIEKFQSEEQQQTEDELQDKIHPF	β-casein	27	F	I
YPVEPFTESQSLTLTDVENLHLPLPLLQSW	β-casein	30	W	Y
LLYQEPVLGPV	β-casein	11	V	L
MHQPHQPLPPTVMFPPQSV	β-casein	19	V	M
KEAMAPKHKEMPFPKYPVEPFTESQS	β-casein	26	S	K
TLTDVENLHLPLPLLQS	β-casein	17	S	T
PVPQKAVPYPQ	β-casein	11	Q	P
PYPQRDMPIQA	β-casein	11	A	P
QSWMHQPHQPLPPTVMFPPQSVL	β-casein	23	L	Q
FQSEEQQQTEDELQDKIHP	β-casein	19	P	F
NIPPLTQTPVVVPPFLQPEVMGVS	β-casein	24	S	N
WMHQPHQPLPPTVMFP	β-casein	16	P	W
PVPQKAVPYPQR	β-casein	12	R	P
HKEMPFPKYPVEPFTESQSLT	β-casein	21	T	H
FPGPIPNSLPQNIPPLTQT	β-casein	19	T	F
SEESITRINKKIEKFQSEEQ	β-casein	20	Q	S
RELEELNVPGEIVE	β-casein	14	E	R
QPEVMGVSKVKEAMAPK	β-casein	17	K	Q
EPFTESQSLTLTDVE	β-casein	15	E	E
LLQSWMHQPHQPLPPTVMFPPQSVLSLS	β-casein	28	S	L
HPFAQTQSLVYPFPGPIPNSLPQNIP	β-casein	26	P	H
WMHQPHQPLPPTVMFPPQSVLSLSQSKV	β-casein	28	V	W
VVPPFLQPEVMGV	β-casein	13	V	V
FPKYPVEPFTESQSLTLTDVENLHL	β-casein	25	L	F
HQPHQPLPPTVMFPPQSVLSLSQ	β-casein	23	Q	H
AQTQSLVYPFPGPI	β-casein	14	I	A
MAPKHKEMPFPKYPVE	β-casein	16	E	M
QTPVVVPPFLQPEVMGVSKVKEAMAP	β-casein	26	P	Q
SSEESITRINKKIEKFQSEEQQQTEDEL	β-casein	28	L	S
AQTQSLVYPFPGPIPNSLPQ	β-casein	20	Q	A
PFPKYPVEPF	β-casein	10	F	P
YPVEPFTESQSLTLTDVENL	β-casein	20	L	Y
EDELQDKIHPFAQTQSLVYPFPGPI	β-casein	25	I	E
FPKYPVEPFTESQSLTLTDVEN	β-casein	22	N	F
SQSLTLTDVENLHLP	β-casein	15	P	S
LNVPGEIVESLSSSEESITR	β-casein	20	R	L
TRINKKIEKFQSEEQQQTEDELQDKIHPF	β-casein	29	F	T
QDKIHPFAQTQSLVYPFPG	β-casein	19	G	Q
PQSVLSLSQSKVLPVPQKAVPYP	β-casein	23	P	P
PVPQKAVPYPQRDMPIQA	β-casein	18	A	P
QPLPPTVMFPPQSVLSLSQSKVL	β-casein	23	L	Q
PYPQRDMPIQAF	β-casein	12	F	P
LQSWMHQPHQPLPPTVMFPPQSVLSLSQS	β-casein	29	S	L
QEPVLGPVRGPFPIIV	β-casein	16	V	Q
VLPVPQKAVPYPQRDMPI	β-casein	18	I	V
MFPPQSVLSLSQSKVLPVPQKAVP	β-casein	24	P	M
PFAQTQSLVYPFPGPIP	β-casein	17	P	P
NVPGEIVESLSSS	β-casein	13	S	N
LQDKIHPFAQTQSLVYPF	β-casein	18	F	L
LLQSWMHQPHQPLPPTVMFPPQSVLSLSQS	β-casein	30	S	L
SQSLTLTDVENLHLPL	β-casein	16	L	S
MHQPHQPLPPTVMFPPQSVLS	β-casein	21	S	M
VPGEIVESLS	β-casein	10	S	V
VPYPQRDMPIQA	β-casein	12	A	V
ESLSSSEESITRINKKIEK	β-casein	19	K	E
SKVKEAMAPKHKEM	β-casein	14	M	S
SLVYPFPGPIPNSLPQNIPPLTQT	β-casein	24	T	S
KHKEMPFPKYPVEPFTE	β-casein	17	E	K
SLSSSEESITRINKKIEKFQSEEQ	β-casein	24	Q	S
SWMHQPHQPLPPTVMFPPQSVLSLSQSK	β-casein	28	K	S
QSWMHQPHQPLPPTVMFPPQS	β-casein	21	S	Q
PPTVMFPPQSVLSLSQSKVLPV	β-casein	22	V	P
PVLGPVRGPFPIIV	β-casein	14	V	P
TPVVVPPFLQPEVMGVSKVKEAMA	β-casein	24	A	T
LTQTPVV	β-casein	7	V	L
AQTQSLVYPFPGPIPNSLPQNIPPLTQTPVVVPPFLQPEVMGV	β-casein	43	V	A
HKEMPFPK	β-casein	8	K	H
VKEAMAPK	β-casein	8	K	V
LQSWMHQPHQPLPPTVMFPPQSVLSLSQSK	β-casein	30	K	L
VLPVPQK	β-casein	7	K	V
DKIHPFAQTQSLV	β-casein	13	V	D
FPGPIPNSLPQNIPPL	β-casein	16	L	F
AQTQSLVYPFPGPIPNSLPQNIPPLTQTPVVVPPFLQPEVMGVSKV	β-casein	46	V	A
GPFPIIV	β-casein	7	V	G
SLVYPFPGPIPNSLPQNIPPLTQTPVVVPPFLQPEVM	β-casein	37	M	S
AVPYPQRDMPIQAFLLYQEPVLGPVRGPFPI	β-casein	31	I	A
KIEKFQSEEQQQTEDELQDKIHPF	β-casein	24	F	K
EDELQDKIHPFAQTQSLVYPFPGPIPNSLPQNIPPLTQTPVVVPPFLQPEVM	β-casein	52	M	E
QTQSLVYPFPGPIPNSLPQNIPPLTQTPVVVPPFLQPEVMGVSKVKEAMAPKH	β-casein	53	H	Q
QSVLSLSQ	β-casein	8	Q	Q
IPPLTQTPVVVPPFLQ	β-casein	16	Q	I
LTQTPVVVPPFLQPEVMGVSKVKEAMAPKHKEMP	β-casein	34	P	L
PVEPFTESQSLTLTDVENL	β-casein	19	L	P
SQSLTLTDVENLHLPLP	β-casein	17	P	S
LVYPFPGPIPNSLPQNIP	β-casein	18	P	L
VYPFPGPIPNSLPQNIPPLTQTPVVVPPFLQPEVMGV	β-casein	37	V	V
SLTLTDVENLHL	β-casein	12	L	S
HKEMPFPKYPVEPFTESQSLTLT	β-casein	23	T	H
DMPIQAFLLYQEPVLGPVRGPFPI	β-casein	24	I	D
TQSLVYPFPGPIPNSLPQNIPPLTQTPVVVPPFLQPEVMGV	β-casein	41	V	T
TQSLVYPFPGPIPNSLPQNIPPLTQTPVVVPPFLQPEVMGVSK	β-casein	43	K	T
INKKIEK	β-casein	7	K	I
TESQSLTLT	β-casein	9	T	T
QDKIHPFAQTQSLVYPFPGPIPNSLPQNIPPLTQTPVVVP	β-casein	40	P	Q
IHPFAQTQSLVYPFPGPIPNSLPQNIPPLTQTPVVVPPF	β-casein	39	F	I
PLPPTVMFPPQSVLSLSQSKVLPVPQ	β-casein	26	Q	P
TQTPVVVPPFLQPEVMGVSKVKEAMAPKHKEMPFPKYPVEP	β-casein	41	P	T
PQNIPPLTQTPVVVPPFLQPEVMGVSKVKEAMAPKHKEMPF	β-casein	41	F	P
PQKAVPYPQRDMPIQAFLLYQEPVLGPVRGPFPI	β-casein	34	I	P
DMPIQAF	β-casein	7	F	D
EELNVPGEIVESLSSSEESITRINKKIEKFQSEE	β-casein	34	E	E
FPPQSVLSLSQSKVL	β-casein	15	L	F
PPFLQPEVMGVSKVKEAMA	β-casein	19	A	P
PFAQTQSLVYPFP	β-casein	13	P	P
LPVPQKAVPYPQRDMPI	β-casein	17	I	L
KFQSEEQQQTEDELQDKIHPFAQTQSLVYPFPGPIPNSLPQ	β-casein	41	Q	K
PFTESQSLTLTDVENLHL	β-casein	18	L	P
KAVPYPQ	β-casein	7	Q	K
VYPFPGPIPNSLPQNIPPLTQ	β-casein	21	Q	V
RDMPIQA	β-casein	7	A	R
ENLHLPLPLLQSWMHQPHQPLPPTVMFPPQSVLSLSQSKVLPVPQKAVPY	β-casein	50	Y	E
SVLSLSQSKVLPVPQKAVPYPQRDMPI	β-casein	27	I	S
NVPGEIVESLSSSEESITRINKKIEKFQSEEQQQTEDELQDKIHPFAQTQSLVY	β-casein	54	Y	N
LTDVENLHLPLPL	β-casein	13	L	L
TQTPVVVPPFLQPEVMGVSKVKEAMAPKHKEMPFPKYPV	β-casein	39	V	T
KVKEAMAPKHKEMP	β-casein	14	P	K
ESLSSSEESITRINKKIEKFQSEEQQQ	β-casein	27	Q	E
VMGVSKVKEAMAPKHKEMPFPKYPVEP	β-casein	27	P	V
KEAMAPKHKEMP	β-casein	12	P	K
TRINKKIEKFQSEEQQQT	β-casein	18	T	T
KEAMAPK	β-casein	7	K	K
EELNVPGEIVESLSSSEESITRINKKIEKFQSEEQQQTEDELQDKIHPFA	β-casein	50	A	E
LSQSKVLPVPQKAVPYPQRDMPIQAFLLYQEPVLG	β-casein	35	G	L
PFPKYPVEPFTESQSLT	β-casein	17	T	P
NSLPQNIPPLTQTPVVVPPFLQPE	β-casein	24	E	N
PPTVMFPPQSVLSLSQ	β-casein	16	Q	P
AVPYPQR	β-casein	7	R	A
LTLTDVENLHLPLPLLQSWMHQPHQPLPPTVMFPPQSVLSL	β-casein	41	L	L
SQSLTLTDVENLHLPLPLLQSWMH	β-casein	24	H	S
HKEMPFPKYPVEPFT	β-casein	15	T	H
ENLHLPLPLLQSWMHQPHQPLPPTV	β-casein	25	V	E
VLPVPQKAVPYPQR	β-casein	14	R	V
KFQSEEQQQTEDELQDKIHPFAQTQS	β-casein	26	S	K
IPPLTQTPVVVPPFLQPEVMGVSKVKEAMAPKHKE	β-casein	35	E	I
QTPVVVPPFLQPEVMGVSKVKEAMAPKHKEMPFPKY	β-casein	36	Y	Q
TESQSLTLTDVENL	β-casein	14	L	T
PFPGPIPNSLPQNIP	β-casein	15	P	P
QPHQPLPPTVMFPPQSVLSLSQSKVLPVPQKAVPYPQRDM	β-casein	40	M	Q
LHLPLPLLQSWMHQPHQPLPPTVMFPPQSVLSL	β-casein	33	L	L
PVLGPVRGPF	β-casein	10	F	P
QPHQPLPPTVMFP	β-casein	13	P	Q
PPLTQTPVVVPPFLQPEVMGVSKVKEAMAPKHKEMPFP	β-casein	38	P	P
IPPLTQTPVVVPPFLQPEVMGVSK	β-casein	24	K	I
PPFLQPEVMGVSKVKEAMAPKHKEMPFPKYPV	β-casein	32	V	P
QPLPPTVMFPPQSVLSLSQSKVLPVPQKAVPYPQRDMPIQAFLLYQEPVLGPVRG	β-casein	55	G	Q
VPQKAVPYPQRDMPIQAFLLYQEPV	β-casein	25	V	V
TLTDVENLHLPL	β-casein	12	L	T
FPGPIPNSLPQNIPPLTQTPVVVPPFLQPEV	β-casein	31	V	F
DELQDKIHPFAQTQSLVYP	β-casein	19	P	D
TDVENLHLPLPLLQSWMHQPHQ	β-casein	22	Q	T
VEPFTESQSLTLTDVENLHLPLPL	β-casein	24	L	V
WMHQPHQPLPPTVMFPPQSVLSLSQSKVLPVPQK	β-casein	34	K	W
ELEELNVPGEIVESLSSSEESITRINKKIEKFQSEE	β-casein	36	E	E
KVKEAMAPKHKEMPFPKYPVEPFTESQSL	β-casein	29	L	K
QEPVLGPVRGPFPII	β-casein	15	I	Q
YPFPGPIPNSLPQNIPPLTQTPVVVPPFLQPEVMGVSKVKEAMAPKH	β-casein	47	H	Y
MPFPKYPVEPFTESQSLTLTDVENLHLPLPLLQSWMHQPH	β-casein	40	H	M
PHQPLPPTVMFPPQSVLSL	β-casein	19	L	P
VMFPPQSVLSLSQSKVLPVPQ	β-casein	21	Q	V
LLQSWMHQPHQPL	β-casein	13	L	L
LQDKIHPFAQTQS	β-casein	13	S	L
PPTVMFPPQSVLS	β-casein	13	S	P
PGPIPNSLPQNIPPLTQTPVVVPP	β-casein	24	P	P
ESQSLTLTDVENLHLPLPLLQSWMHQPHQPLPPTVMFP	β-casein	38	P	E
TESQSLTLTDVENLH	β-casein	15	H	T
VMGVSKVKEAMAPKHKEMPFPKYPVEPFTESQSL	β-casein	34	L	V
RINKKIEKFQSEEQQQTEDELQDKI	β-casein	25	I	R
IVESLSSSEESITRI	β-casein	15	I	I
AQTQSLVYPFPGPIPNSLPQNIPPLTQTPV	β-casein	30	V	A
ESITRINKKIEKFQSEEQQQTEDELQDKIHPFAQTQSLV	β-casein	39	V	E
GVSKVKEAMAPKHKEMPFPKYPVEPFTESQS	β-casein	31	S	G
QAFLLYQEPVLGPVRGPFPIIV	β-casein	22	V	Q
PIPNSLPQNIPPLTQTPVVVPPFLQPEVMGVSKVKEA	β-casein	37	A	P
KVKEAMAPKHKEMPFPKYPVEPFTESQSLTLTDVENLHLPLPLLQSWMHQP	β-casein	51	P	K
PQSVLSLS	β-casein	8	S	P
QTQSLVYPFPGPIPNSLPQNIPPLTQTPVVVP	β-casein	32	P	Q
IEKFQSEEQQQTEDELQDKIHPFAQT	β-casein	26	T	I
VVVPPFLQPEVMGVSK	β-casein	16	K	V
TPVVVPPFLQPEVMGVSKVKEAMAPKHKEMPFPKYPVEPFTES	β-casein	43	S	T
LPVPQKAVPYPQRDMPIQAFLLYQEPVLGPVRGPF	β-casein	35	F	L
VYPFPGPIPNSLPQNIPPLTQTPVVVPPFLQPEVMGVSKV	β-casein	40	V	V
MGVSKVKEAMAPKHKEMPFPKYPVEPFTESQSLTLTDVE	β-casein	39	E	M
QDKIHPFAQTQSLVYPFP	β-casein	18	P	Q
PNSLPQNIPPLTQ	β-casein	13	Q	P
DKIHPFAQTQSLVYPFP	β-casein	17	P	D
AQTQSLVYPFPGPIPNSLPQNIPPLTQTPVVVPPFLQP	β-casein	38	P	A
PKYPVEPF	β-casein	8	F	P
ELQDKIHPFAQTQSLVYPFPGPIPNSLPQNIPPLTQTPVVVPPFLQPE	β-casein	48	E	E
TESQSLTLTDVENLHLPLPLLQSWMHQPHQPLPPTVM	β-casein	37	M	T
QTQSLVYPFPGPIPNSLPQNIPPLTQTPVVVPPFLQPEVMGVSKVKEAM	β-casein	49	M	Q
QDKIHPFAQTQSLV	β-casein	14	V	Q
LEELNVPGEI	β-casein	10	I	L
IPNSLPQNIPPLTQTPVVVPPFLQ	β-casein	24	Q	I
PIPNSLPQNIPPLTQTPVVVPPFLQPEVMGVSKVKEAMAPKHKEMPFP	β-casein	48	P	P
TVMFPPQSVLSLSQSKVLPVPQKAVPYPQRDMPIQAFLLYQEPVLG	β-casein	46	G	T
TRINKKIEKFQSEEQQQTEDELQDKIHPFAQTQSLVYP	β-casein	38	P	T
PNSLPQNIPPLTQTPVVVPPFLQPEVM	β-casein	27	M	P
PIPNSLPQNIPP	β-casein	12	P	P
QPEVMGVSKVKEAMAPKHKEMP	β-casein	22	P	Q
KEAMAPKHKEMPFPKYPVEPFTESQSLTLTDVENLHLPLP	β-casein	40	P	K
VKEAMAPKHKEMPFPKYPVEPFTESQSLTLT	β-casein	31	T	V
LSLSQSKVLPVPQKAVPYPQRDMPIQAFLLYQEPVLGPVRGPFP	β-casein	44	P	L
LTDVENLHLPLPLLQSWMHQPHQPLPPTVMFPPQSVLSLSQSKVLP	β-casein	46	P	L
INKKIEKFQSEEQQ	β-casein	14	Q	I
PVEPFTESQSLTLTDVENLHLPLPLLQSWMHQPHQPLPPTVMFPPQSV	β-casein	48	V	P
MAPKHKEMPFPKYPVEPFTESQSLTLTDVENLHLPLP	β-casein	37	P	M
PPQSVLSLSQSKVLPVPQKAVPY	β-casein	23	Y	P
EVMGVSKVKEAMAPKHKEMPFPKYPVEPFT	β-casein	30	T	E
SEEQQQTEDELQDKIHPF	β-casein	18	F	S
ENLHLPLPLLQSWMHQPHQPLPPTVMFPPQSVLSLSQSKVLPVPQKAVPYPQRDMP	β-casein	56	P	E
TQSLVYPFPGPIPNSLPQNIPPLTQTPVVVPPFLQPEVMG	β-casein	40	G	T
KIHPFAQTQSLVYPFPGPIPNSLPQNIPPLTQTPVVVPPFLQPEV	β-casein	45	V	K
TPVVVPPFLQPEVMGVSKVKEAMAPKHKEMPFPKYPVEPFTESQSLTLTDVE	β-casein	52	E	T
FLQPEVMGVSKVKEAMAPKHKEMPFPKYPVEPFTESQSLTLTDVENLHLPLPL	β-casein	53	L	F
PQSVLSLSQSKVLPVPQKAVPYPQRDMPIQAFLLYQ	β-casein	36	Q	P
TVMFPPQSVLS	β-casein	11	S	T
FLQPEVMGVSKVKEAMAPKHKEMPFPK	β-casein	27	K	F
FPPQSVLSLSQSKVLPVPQKAVPYPQRDMPIQAFLLYQEPVLGPVRGPF	β-casein	49	F	F
PQRDMPIQAFLLYQEPVLGPVRGPFPIIV	β-casein	29	V	P
KEAMAPKHKEMPFPKYPVEPFTESQSLTLTDVENLHLPLPLLQS	β-casein	44	S	K
VKEAMAPKHKEMPFPKYPVEPFTESQSL	β-casein	28	L	V
SLVYPFPGPIPNSLPQNIPPLTQTPVVVPPFLQPEVMGVSKVKEAMAPKHKE	β-casein	52	E	S
IEKFQSEEQQQTEDELQDKIHPFAQTQSLVYPFPGPIPNSLPQNIPPLT	β-casein	49	T	I
SKVKEAMAPKHKEMPFPKYPVEPFTESQSLTLTDVENLHLPLPLLQS	β-casein	47	S	S
NKKIEKFQSEEQQ	β-casein	13	Q	N
QSLVYPFPGPIPNS	β-casein	14	S	Q
PPFLQPEVMGVSK	β-casein	13	K	P
VEPFTESQSLTLTDVENLHLPLPLLQSWMHQPHQPLPPTVMFPPQSVLSLSQSK	β-casein	54	K	V
PGPIPNSLPQNIPPLTQTPVVVPPFLQPEVMGVS	β-casein	34	S	P
QRDMPIQAFLLYQEP	β-casein	15	P	Q
QSVLSLSQSKVLPVPQKAVPYPQRDMPIQAFLLYQEP	β-casein	37	P	Q
ESQSLTLTDVENLHLPLPLLQSWMHQPHQPLPPTVMFPPQSVLSL	β-casein	45	L	E
LPLLQSWMHQPHQPLPPTVMFPPQSV	β-casein	26	V	L
SLSQSKVLPVPQKAVPYPQRDMPIQAFLLYQEPVLGP	β-casein	37	P	S
AVPYPQRDMPIQAFLLYQEPV	β-casein	21	V	A
QPHQPLPPTVMFPPQSVLSLSQSKVLPVPQKAVPYPQRDMPIQAFLLYQ	β-casein	49	Q	Q
MPFPKYPVEPFTESQSLTLTDVENLHLPLPLLQSWMH	β-casein	37	H	M
TDVENLHLPLPLLQSWMHQPHQPLPPTVMFPPQSVLSLSQS	β-casein	41	S	T
LQSWMHQPHQPLPPTVMFPPQS	β-casein	22	S	L
VKEAMAPKHKEMPFPKYPVEPFTESQSLTLTDVEN	β-casein	35	N	V
QPEVMGVSKVKEAMAPKHKEMPFPKYPVEPFTESQ	β-casein	35	Q	Q
VLPVPQKAVPYPQRDMPIQAFLLY	β-casein	24	Y	V
PLTQTPVVVPPFLQPEVMGVSKVKEAMAPKHKEMPF	β-casein	36	F	P
HQPHQPLPPTVMFPPQSVLSLSQSKVL	β-casein	27	L	H
KAVPYPQRDMPIQAFLLYQEPVLGPVRGPFPI	β-casein	32	I	K
TDVENLHLPLPLLQSWMHQPHQPLPPTVMFPPQSV	β-casein	35	V	T
SLSSSEESITRINKKIEKFQSEEQQQTEDELQDKIHPFAQTQSL	β-casein	44	L	S
QQTEDELQDKIHPFAQTQSLVYPFPGPIPNSLPQNIPPLTQTP	β-casein	43	P	Q
LTQTPVVVPPFLQPEVMGVSKVKEAMAPKHKEMPFPKY	β-casein	38	Y	L
IPPLTQTPVVVPPFLQPEVMGVSKVK	β-casein	26	K	I
PPQSVLSLSQSKVLPVPQKAVPYPQRDMPIQAFLLYQEPVLGPVRGPFP	β-casein	49	P	P
VENLHLPLPLLQSWMHQPHQPLPPTVMFPPQSVLSLSQSKVLPVPQKAVPYPQRDM	β-casein	56	M	V
IPPLTQTPVVVPPFLQPEVMGVSKVKEAMAPKHKEMPFPKYPVEPFTESQSLT	β-casein	53	T	I
FPGPIPNSLPQNIPPLTQTPVVVPPFLQPE	β-casein	30	E	F
VVPPFLQPEVMGVSKVKEAMAPKHKEMPFPKYPVEPFTESQSLTLTDV	β-casein	48	V	V
LNVPGEIVESLSSSEESITRINKKIEKFQSEEQQQTEDELQDKIHPFAQ	β-casein	49	Q	L
LSSSEESITRINKKIEKFQSEEQQQTEDELQDKI	β-casein	34	I	L
LVYPFPGPIPNSLPQNIPPLTQTPVV	β-casein	26	V	L
HQPLPPTVMFPPQSVLSLSQSKVLPV	β-casein	26	V	H
FPPQSVLSLSQSKVLPVPQKAVPYPQRDMPIQA	β-casein	33	A	F
VLPVPQKAVPYPQRDMPIQAFLLYQEPVLGP	β-casein	31	P	V
QNIPPLTQTPVVVPPFLQPEVMG	β-casein	23	G	Q
QSKVLPVPQKAVPYPQRDMPIQAFLLYQEPVLGPVRGPFPII	β-casein	42	I	Q
PPTVMFPPQS	β-casein	10	S	P
MPIQAFLLYQEPVLGP	β-casein	16	P	M
PFTESQSLTLTDVENLHLPLPLLQSWMHQPHQPLPPTVMFPPQSVLSLSQSKVLPVPQ	β-casein	58	Q	P
TLTDVENLHLPLPLLQSWMHQPHQPLPPTVMFPPQSVLSLSQSKVLP	β-casein	47	P	T
LQSWMHQPHQPLPPTVMFPPQSVLSLSQSKVLPVPQKAVPYPQRD	β-casein	45	D	L
PFAQTQSLVYPFPGPIPNSLPQNI	β-casein	24	I	P
KYPVEPFTESQSLTLTDVENLHLPLPLLQSWMHQPHQPLPPTVMFP	β-casein	46	P	K
QPLPPTVMFPPQSV	β-casein	14	V	Q
EKFQSEEQQQTEDELQDKIHPFAQTQSLVYPFPGPIPN	β-casein	38	N	E
EMPFPKYPVEPFTESQSLTLTDVENLHLPL	β-casein	30	L	E
LLQSWMHQPHQPLPPTVMFPPQSVLSLSQSKVLPVPQKAVPYPQRDMPIQAFLLYQ	β-casein	56	Q	L
VESLSSSEESITRINKKIEKFQSEEQQQTEDELQDK	β-casein	36	K	V
EIVESLSSSEESITRINKKIEKFQSEEQQQTEDELQDKIHPFAQTQSLVY	β-casein	50	Y	E
SLSSSEESITRI	β-casein	12	I	S
PQNIPPLTQTPVVVPPFLQPEVMGVSKVKEAMAPKHKEMPFPKYPVEPFTE	β-casein	51	E	P
VENLHLPLPLLQSWMHQPHQPLP	β-casein	23	P	V
PPLTQTPVVVPPFLQPEVMGVS	β-casein	22	S	P
TLTDVENLHLPLPLLQSWMH	β-casein	20	H	T
FAQTQSLVYPFPGPIPNSLPQNIPPL	β-casein	26	L	F
KFQSEEQQQTEDELQDKIHPFAQTQSLVYPFPGPIPN	β-casein	37	N	K
PQNIPPLTQTPVVVPPFLQPEVMGVSK	β-casein	27	K	P
TDVENLHLPLPLLQS	β-casein	15	S	T
QSLTLTDVENLHLPLPLLQSWMHQPHQPLP	β-casein	30	P	Q
LPQNIPPLTQTPVVVPPFLQPEVMGVSKVKE	β-casein	31	E	L
DKIHPFAQTQSLVYPFPGPIPNSLPQNIPPLTQTPVVVPPFLQPEVMGVS	β-casein	50	S	D
EIVESLSSSEESITRINKKIEK	β-casein	22	K	E
VPQKAVPYPQRDMPIQAFLLYQ	β-casein	22	Q	V
SLSQSKVLPVPQKAVPYPQRDMPIQAFLLY	β-casein	30	Y	S
PQKAVPYPQRD	β-casein	11	D	P
IHPFAQTQSLVYPFPGPIPNSLPQN	β-casein	25	N	I
SQSKVLPVPQKAVPYPQRDMPIQAFLLYQEPVLGPVRGPFPIIV	β-casein	44	V	S
PLPPTVMFPPQSVLSLSQSKVLPVPQKAVPYPQRDMPIQAFLLYQEPVLGPV	β-casein	52	V	P
VENLHLPLPLLQSWMHQPHQ	β-casein	20	Q	V
VVVPPFLQPEVMGVSKVKEAMAPKHKEMPFPKYPVEPFTESQSLTLTDVE	β-casein	50	E	V
TRINKKIEKFQSEEQQQTEDELQDK	β-casein	25	K	T
DKIHPFAQTQSLVYPFPGPIPNSLPQN	β-casein	27	N	D
LPPTVMFPPQSVLSLSQSKVLPVPQKAVPYPQRDM	β-casein	35	M	L
EKFQSEEQQQTEDELQDKIHPFAQTQSLVYPF	β-casein	32	F	E
LHLPLPLLQSWMHQPHQPLPPTVMFPPQSVLSLSQSKVLPVPQKAVP	β-casein	47	P	L
GPIPNSLPQNIPPL	β-casein	14	L	G
LQDKIHPFAQTQSLVYPFPGPIP	β-casein	23	P	L
MHQPHQPLPPTVMFPPQSVLSLSQSKVLPV	β-casein	30	V	M
MAPKHKEMPFPKYPVEPFTESQSLTLTDVENLHLPLPLL	β-casein	39	L	M
PHQPLPPTVMFPPQSVLSLSQSKVLPVPQKAVPYPQRDMPIQ	β-casein	42	Q	P
ENLHLPLPLLQSWMHQPHQPLPPTVMFPPQSVLSLSQSK	β-casein	39	K	E
TVMFPPQSVLSLSQSKVLPVPQKAVPYPQ	β-casein	29	Q	T
FLQPEVMGVSKVKEAMAPK	β-casein	19	K	F
FTESQSLTLTDVENLHLPLPLLQSWMHQP	β-casein	29	P	F
LPLPLLQSWMHQPHQPLPPTVMFPPQS	β-casein	27	S	L
FTESQSLTLTD	β-casein	11	D	F
KKIEKFQSEEQQQTEDELQDKIHPFAQTQSLVYPFPGPIPNSLPQNIPPLTQTPVVV	β-casein	57	V	K
QPHQPLPPTVMFPPQSVLSLSQSKVLPVPQKAVPYPQRDMPIQAFLLYQEPVLGPVRGP	β-casein	59	P	Q
QPHQPLPPTVMFPPQSVLSLSQSKVLPVPQK	β-casein	31	K	Q
HPFAQTQSLVYPFPGPIPNSLPQNIPPLTQTPVV	β-casein	34	V	H
SEESITRINKKIEKFQSEEQQ	β-casein	21	Q	S
QPLPPTVMFPPQSVLSLSQSKVLPVPQKAVPYPQRDMPIQAFLLYQ	β-casein	46	Q	Q
PPFLQPEVMGVSKVKEAMAPK	β-casein	21	K	P
VESLSSSEESITRINKKIEKFQSEEQQQTEDELQDKIHPFAQTQSLVY	β-casein	48	Y	V
YPVEPFTESQSLTLTDVENLHLPLPLLQSWMHQPHQPLPPT	β-casein	41	T	Y
LSQSKVLPVPQKAVPYPQRDMPIQAFLLYQEPVLGPVRG	β-casein	39	G	L
TQTPVVVPPFLQPEVMGVSKVKEAMAPK	β-casein	28	K	T
HPFAQTQSLVYPFPGPIPNSLPQNIPPLTQTPVVVPPFLQPEVMGVSKVK	β-casein	50	K	H
EMPFPKYPVEPFTESQSLTLTD	β-casein	22	D	E
PLTQTPVVVPPFLQPEVMGVSKVKEAMAPKHKE	β-casein	33	E	P
ELQDKIHPFAQTQSLVYPFPGPIPNSLPQNIPPLTQTPV	β-casein	39	V	E
GEIVESLSSSEESITRINKKIEKFQSE	β-casein	27	E	G
SKVLPVPQKAVPYPQRDMPIQA	β-casein	22	A	S
QQQTEDELQDKIHPFAQTQSLVYPFPGPIPN	β-casein	31	N	Q
PNSLPQNIPPLTQTPVVVPPFLQPEVMGVSKVKEAMAPKHKEMPFPKYP	β-casein	49	P	P
LPQNIPPLTQTPVVVPPFLQPEVM	β-casein	24	M	L
TRINKKIEKFQSEEQ	β-casein	15	Q	T
ELNVPGE	β-casein	7	E	E
QSVLSLSQSKVLPVPQKAVPYPQRDMPIQAFL	β-casein	32	L	Q
EPFTESQSLTLTDVENLHLPLPLLQSWMHQP	β-casein	31	P	E
QQTEDELQDKIHPFAQTQSLVY	β-casein	22	Y	Q
MGVSKVKEAMAPKHKEMPFPKYPVEPFTESQSLTLTDVENLHLPLPL	β-casein	47	L	M
LQPEVMGVSKVKEAMAPKHKEMPFPKYPVEPFTE	β-casein	34	E	L
ESITRINKKIEKFQSEEQQQTEDELQDKIHPFAQTQSLVYPFPGPIP	β-casein	47	P	E
LSQSKVLPVPQKAVPYPQRDMPIQAFLLYQEP	β-casein	32	P	L
PYPQRDMPIQAFLLYQEP	β-casein	18	P	P
SITRINKKIEKFQ	β-casein	13	Q	S
EKFQSEEQQQTEDELQDKIHPFAQTQSLVYPFPGPIPNSLPQ	β-casein	42	Q	E
VLPVPQKAVPYPQRDMPIQAFLLYQEPVLGPVRGPFPI	β-casein	38	I	V
SVLSLSQSKVLPVPQKAVPYPQRDMPIQAFLLYQEPVL	β-casein	38	L	S
RINKKIEKFQSEEQQQTEDELQDKIHPFAQTQSLVYPFPGPIPNSLPQNIPPLTQTP	β-casein	57	P	R
PFTESQSLTLTDVENLHLPLPLLQSWMHQPHQPLPPTVMFPPQSVLSL	β-casein	48	L	P
PLLQSWMHQPHQPLPPTVMFPPQSVLSLSQSKVLPVPQKAVPYPQR	β-casein	46	R	P
KIEKFQSEEQQQTEDELQDKIHPFAQTQSLVY	β-casein	32	Y	K
PFPGPIPNSLPQNIPPLTQTPVVVPPFLQPEVMGVSKVKEAMAPKHKEMPFPKYPVEPF	β-casein	59	F	P
YPFPGPIPNSLPQNIPPLTQTPVVVPPFLQPEVMGVSK	β-casein	38	K	Y
PGPIPNSLPQNIPPLTQTPVVVPPFLQPEVMGVSKVKEAMAPKHKEMP	β-casein	48	P	P
FAQTQSLVYPFPGPIPNSLPQNIPPLTQTPVVV	β-casein	33	V	F
PPFLQPEVMGVSKVKEAMAPKHKEMPFPKYPVEPFTESQSLTLTDVENLHL	β-casein	51	L	P
QTQSLVYPFPGPIPNSLPQNIPPLTQTPVVVPPFLQPEVMG	β-casein	41	G	Q
NVPGEIVESLSSSEESIT	β-casein	18	T	N
SQSKVLPVPQKAVPYPQRDMPIQA	β-casein	24	A	S
TQTPVVVPPFLQPEVMGVSKVKEAMAPKHKEMPFPKYPVEPFTES	β-casein	45	S	T
EPFTESQSLTLTDVENLHLPLPLLQSWMHQPH	β-casein	32	H	E
LTLTDVENLHLPLPLLQSWMHQPHQPLPPTVMFPPQSVLSLSQSKVLPVPQKAVPYP	β-casein	57	P	L
ELQDKIHPFAQTQSL	β-casein	15	L	E
YPFPGPIPNSLPQNIPPLTQTPVVV	β-casein	25	V	Y
MPFPKYPVEPFTESQSLTLTDVENLHLPLPLLQSWMHQPHQPLPPTVMFPPQSVL	β-casein	55	L	M
EELNVPGEIVESLSSSEESITRINKKIEKFQSE	β-casein	33	E	E
SQSKVLPVPQK	β-casein	11	K	S
PPFLQPEVMGV	β-casein	11	V	P
TEDELQDKIHPFAQTQSLVYPFP	β-casein	23	P	T
EIVESLSSSEESITRINKKIEKFQSEEQQQ	β-casein	30	Q	E
QDKIHPFAQTQSLVYPFPGPIPNSLPQNIPPLTQTPVVVPPFLQP	β-casein	45	P	Q
SLTLTDVENLHLPLPLLQSWMHQPHQPLPPTVMFPPQSVLSLSQSKVLPVPQKAVPY	β-casein	57	Y	S
PHQPLPPTVMFPPQSVLSLSQSKVLPVPQKAVPYPQRDMPIQAFLLYQEPVL	β-casein	52	L	P
LSLSQSKVLPVPQKAVPYPQRDMPIQAFLL	β-casein	30	L	L
PIQAFLLYQEPVLGPVRGPFPIIV	β-casein	24	V	P
SITRINKKIEKFQSEEQQQTEDELQDKIHPFAQTQS	β-casein	36	S	S
PHQPLPPTVMF	β-casein	11	F	P
RDMPIQAFLLYQEPVLGPVR	β-casein	20	R	R
SKVKEAMAPKHKE	β-casein	13	E	S
FLQPEVMGVSKVKEAMAPKHKEMP	β-casein	24	P	F
VPYPQRDMPIQAFLLYQEPVLGPVRG	β-casein	26	G	V
PGEIVESLSSSEESITRINKK	β-casein	21	K	P
PPTVMFPPQSV	β-casein	11	V	P
MHQPHQPLPPTVMFPPQSVLSLSQSKVLPVPQKAVPYPQRDM	β-casein	42	M	M
EQQQTEDELQDKIHPFAQTQSLVYPFPGPIPNSLP	β-casein	35	P	E
LEELNVPGEIVESLSSSEESITRINKKIEKFQSEEQQQTEDELQDKIHP	β-casein	49	P	L
AQTQSLVYPFPGP	β-casein	13	P	A
KIHPFAQTQSLVYPFPGPIPNSLPQNIPPLTQTPVVVPPFLQPEVMGVSK	β-casein	50	K	K
DVENLHLPLPLLQSWMHQPHQPLPPT	β-casein	26	T	D
DELQDKIHPF	β-casein	10	F	D
GVSKVKEAMAPKHKEMPFPKYPVEPFTESQSLTLTDVENLHLPLPLL	β-casein	47	L	G
PQKAVPYPQRDMPIQA	β-casein	16	A	P
MAPKHKEMPFPKYPVEPFTESQSLTLTDVENLHLPL	β-casein	36	L	M
EVMGVSKVKEAMAPKHKEMPFPKYPVEPFTESQSLTLTDVENLHLPLPLLQSWMHQPHQP	β-casein	60	P	E
SITRINKKIEKFQSE	β-casein	15	E	S
LPPTVMFPPQSVLSLSQSKVLPVPQKAVPYPQRDMPIQA	β-casein	39	A	L
PLPLLQSWMHQPHQPL	β-casein	16	L	P
LTDVENLHLPLPLLQSWMHQPHQPLPPTVMFPPQSVL	β-casein	37	L	L
PTVMFPPQSVLSLSQSKVLPVPQKAVPYPQRDMPIQAFLLYQEPV	β-casein	45	V	P
INKKIEKFQSEEQQQTEDEL	β-casein	20	L	I
VSKVKEAM	β-casein	8	M	V
GVSKVKEAMAPKHKEMPFPKYPVEPFTESQSLTLTDVE	β-casein	38	E	G
LTQTPVVVPPFLQPEVMGVSKVKEAMAPKH	β-casein	30	H	L
QDKIHPFAQTQSLVYPFPGPIPNSLPQNIPPLTQTPV	β-casein	37	V	Q
APKHKEMPFPKY	β-casein	12	Y	A
ESQSLTLTDVENLHLPLPL	β-casein	19	L	E
FPKYPVEPFTESQSLTLTDVENLHLPLPLLQSWMHQPHQ	β-casein	39	Q	F
VPGEIVESLSSSEESITRINKKIEKFQSEEQQQTEDELQDKIHPFAQTQSLV	β-casein	52	V	V
HPFAQTQSLVYPFPGPIPNSLPQNIPPLTQTPVVVPPFLQPEVMGVSK	β-casein	48	K	H
TDVENLHLPLPLLQSWMHQPHQPL	β-casein	24	L	T
VVPPFLQPEVMGVSKVKEAMAPKHKEMPFPKYPV	β-casein	34	V	V
EDELQDKIHPFAQTQSLVYPFPG	β-casein	23	G	E
LSSSEESITRINKKIEKFQSEEQQQTEDELQ	β-casein	31	Q	L
PHQPLPPTVMFPPQSVLSLSQSKVLPVPQKAVPYPQRDMPIQAFLLYQ	β-casein	48	Q	P
QQQTEDELQDKIHPFAQTQSLVYPFPGPIPNSLP	β-casein	34	P	Q
PQKAVPYPQRDMPIQAFLLYQEPVLGPV	β-casein	28	V	P
GPIPNSLPQNIPPLTQTPVVVPPFLQPEVMGVSKVKEAMAPK	β-casein	42	K	G
GEIVESLSSSEESI	β-casein	14	I	G
DKIHPFAQTQSLVYPFPGPIPNSLPQNIPPLTQTPVVVPPFLQPEVMGV	β-casein	49	V	D
PVVVPPFLQPEVMGVSKVKEAMAPK	β-casein	25	K	P
NSLPQNIPPLTQTPVV	β-casein	16	V	N
TDVENLHLPLPLLQSWMHQPHQPLP	β-casein	25	P	T
HKEMPFP	β-casein	7	P	H
LTQTPVVVPPF	β-casein	11	F	L
VPPFLQPEVMGVSKVKEAMAPK	β-casein	22	K	V
HQPHQPLPPTVMFPPQSVLSLSQSKV	β-casein	26	V	H
PPLTQTPVVVPPFLQPEVMGVSKVKEAMAPKHKEMPFPKYPVEPFTESQSLT	β-casein	52	T	P
HLPLPLLQSWMHQPHQPLPPTVMFPPQSVLSLSQSKVLPVPQKAV	β-casein	45	V	H
FLQPEVMGVSKVKEAMAPKHKEMPFPKYPVEPFTESQSLTLTDVENLHLPLPLLQSWM	β-casein	58	M	F
KFQSEEQQQTEDELQDKIHPF	β-casein	21	F	K
FTESQSLTLTDVENL	β-casein	15	L	F
PLPLLQSWMHQPHQPLPPTVMFPPQSVLSLSQSK	β-casein	34	K	P
QSLVYPFPGPIPNSLPQNI	β-casein	19	I	Q
PNSLPQNIPPLTQTPVVVPPFLQPEVMGV	β-casein	29	V	P
SQSKVLPVPQKAVPYPQRDMPIQAFLLYQEPVLGPV	β-casein	36	V	S
SKVLPVPQKAVPYPQRDMPI	β-casein	20	I	S
PFTESQSLTLTDVENLHLPLPLLQSWMHQ	β-casein	29	Q	P
LQSWMHQPHQPLPPTVMFPP	β-casein	20	P	L
RPKHPIKHQGLPQEVLNENL	αs1-casein	20	L	R
FFVAPFPEVFGK	αs1-casein	12	K	F
FFVAPFPEVFGKEK	αs1-casein	14	K	F
KHPIKHQGLPQEVLNENL	αs1-casein	18	L	K
HIQKEDVPSER	αs1-casein	11	R	H
FFVAPFPEVFG	αs1-casein	11	G	F
RPKHPIKHQGLPQEVLNENLL	αs1-casein	21	L	R
HPIKHQGLPQEVLNENL	αs1-casein	17	L	H
TDAPSFSDIPNPIGSENSEKTTMPL	αs1-casein	25	L	T
RPKHPIKHQGLPQEVLNEN	αs1-casein	19	N	R
HIQKEDVPSERYLGYLEQLL	αs1-casein	20	L	H
HQGLPQEVLNENL	αs1-casein	13	L	H
RPKHPIKHQGLPQEV	αs1-casein	15	V	R
GSENSEKTTMPL	αs1-casein	12	L	G
EGIHAQQKEPMIGVNQELAYFYPEL	αs1-casein	25	L	E
VAPFPEVFGK	αs1-casein	10	K	V
HIQKEDVPSERYLGYLEQL	αs1-casein	19	L	H
HIQKEDVPSERYLGYLEQ	αs1-casein	18	Q	H
FFVAPFPEVFGKEKVNELS	αs1-casein	19	S	F
KHPIKHQGLPQEVLNENLL	αs1-casein	19	L	K
IVPNSVEQKHIQKEDV	αs1-casein	16	V	I
PFPEVFGKEK	αs1-casein	10	K	P
YVPLGTQYTDAPSFSDIPNPIGSENSEK	αs1-casein	28	K	Y
YLGYLEQLLR	αs1-casein	10	R	Y
EGIHAQQKEPMIGVNQELA	αs1-casein	19	A	E
HPIKHQGLPQEVLNENLL	αs1-casein	18	L	H
KHPIKHQGLPQEVLNEN	αs1-casein	17	N	K
VAPFPEVFGKEK	αs1-casein	12	K	V
TDAPSFSDIPNPIGSENSEK	αs1-casein	20	K	T
YKVPQLEIVPN	αs1-casein	11	N	Y
FFVAPFPEVFGKEKVNEL	αs1-casein	18	L	F
HQGLPQEVLNENLL	αs1-casein	14	L	H
GTQYTDAPSFSDIPNPIGSENSEKTTMPL	αs1-casein	29	L	G
HPIKHQGLPQEVLNEN	αs1-casein	16	N	H
FVAPFPEVFGK	αs1-casein	11	K	F
KHPIKHQGLPQEV	αs1-casein	13	V	K
YKVPQLEIVPNSAEER	αs1-casein	16	R	Y
FVAPFPEVFG	αs1-casein	10	G	F
GLPQEVLNENL	αs1-casein	11	L	G
EGIHAQQKEPMIGVNQELAYFYPELF	αs1-casein	26	F	E
YVPLGTQYTDAPSFSDIPNPI	αs1-casein	21	I	Y
IKHQGLPQEVLNENL	αs1-casein	15	L	I
FFVAPFPEVFGKE	αs1-casein	13	E	F
FVAPFPEVFGKEK	αs1-casein	13	K	F
FFVAPFPEVFGKEKV	αs1-casein	15	V	F
YLGYLEQLLRLK	αs1-casein	12	K	Y
HPIKHQGLPQEV	αs1-casein	12	V	H
HQGLPQEVLNEN	αs1-casein	12	N	H
APSFSDIPNPIGSENSEKTTMPL	αs1-casein	23	L	A
TDAPSFSDIPNPI	αs1-casein	13	I	T
VAPFPEVFGKEKVNELS	αs1-casein	17	S	V
YKVPQLEIVPNSAEERLHSM	αs1-casein	20	M	Y
HIQKEDVPSE	αs1-casein	10	E	H
WYYVPLGTQYTDAPSFSDIPNPI	αs1-casein	23	I	W
EGIHAQQKEPMIGVNQELAYFYPELFRQF	αs1-casein	29	F	E
EDVPSERYLGYLEQLL	αs1-casein	16	L	E
WYYVPLGTQYTDAPSFSDIPNPIGSENSEK	αs1-casein	30	K	W
GLPQEVLNENLL	αs1-casein	12	L	G
KHPIKHQGLPQEVLNENLLR	αs1-casein	20	R	K
TQYTDAPSFSDIPNPIGSENSEKTTMPLW	αs1-casein	29	W	T
GTQYTDAPSFSDIPNPI	αs1-casein	17	I	G
SMKEGIHAQQKEPMIGVNQELAYFYPEL	αs1-casein	28	L	S
APFPEVFGKEKVNELSKDIGSE	αs1-casein	22	E	A
EPMIGVNQELAYFYPEL	αs1-casein	17	L	E
GAWYYVPLGTQYTDAPSFSDIPNPI	αs1-casein	25	I	G
SDIPNPIGSENSEKTTMPL	αs1-casein	19	L	S
DIKQMEAESISSSEEIVPNSVEQKHIQ	αs1-casein	27	Q	D
ELFRQFYQLDAYPSGAWYYVPLGTQYTD	αs1-casein	28	D	E
VAPFPEVFGKE	αs1-casein	11	E	V
IQKEDVPSER	αs1-casein	10	R	I
QYTDAPSFSDIPNPIGSENSEKTTMPL	αs1-casein	27	L	Q
YKVPQLEIVPNSAEERLH	αs1-casein	18	H	Y
LKKYKVPQLEIVPNSAEER	αs1-casein	19	R	L
SAEERLHSMKEGIHAQQKEPMIGVNQEL	αs1-casein	28	L	S
APSFSDIPNPIGSENSEK	αs1-casein	18	K	A
EPMIGVNQELAYFYPELFRQ	αs1-casein	20	Q	E
LHSMKEGIHAQQKEPMIGVNQEL	αs1-casein	23	L	L
FPEVFGKEKVNELSKDIGSES	αs1-casein	21	S	F
DAPSFSDIPNPIGSENSEKTTMPL	αs1-casein	24	L	D
KEGIHAQQKEPMIGVNQELAYFYPEL	αs1-casein	26	L	K
RFFVAPFPEVFGK	αs1-casein	13	K	R
GVNQELAYFYPELFRQFYQLDAYPSGAWYY	αs1-casein	30	Y	G
RPKHPIKHQGLPQEVLNENLLRFFVAPFPE	αs1-casein	30	E	R
KVNELSKDIGSESTEDQAMEDIKQMEAE	αs1-casein	28	E	K
NELSKDIGSES	αs1-casein	11	S	N
HQGLPQEVLNENLLRFFVAPFPEV	αs1-casein	24	V	H
NQELAYFYPELFRQFY	αs1-casein	16	Y	N
PNSAEERLHSMKEGIHAQQKEP	αs1-casein	22	P	P
QFYQLDAYPSGA	αs1-casein	12	A	Q
EIVPNSAEERLHSM	αs1-casein	14	M	E
EDIKQMEAESISSSEEIVPNSVEQKHI	αs1-casein	27	I	E
FFVAPFPEVFGKEKVNE	αs1-casein	17	E	F
MKEGIHAQQKEPMIGVNQELA	αs1-casein	21	A	M
VPQLEIVPNSAEERLHSMK	αs1-casein	19	K	V
NQELAYFYPELFRQFYQL	αs1-casein	18	L	N
PIKHQGLPQEVLNE	αs1-casein	14	E	P
LKKYKVPQLEIVPNSAEERLHSMKE	αs1-casein	25	E	L
FFVAPFPEVFGKEKVNELSKDIGSESTE	αs1-casein	28	E	F
AQQKEPMIGVNQELAYFYPELFR	αs1-casein	23	R	A
RFFVAPFPEVFGKEKVNELSKDIGSE	αs1-casein	26	E	R
YLEQLLRLKKYKVPQLEIVPNSAEER	αs1-casein	26	R	Y
EPMIGVNQELA	αs1-casein	11	A	E
AYPSGAWYYVPLGTQYTDAPS	αs1-casein	21	S	A
MKEGIHAQQKEPMIGVNQ	αs1-casein	18	Q	M
FFVAPFPEVFGKEKVNELSKDIG	αs1-casein	23	G	F
IVPNSAEERLHSMKEGIHA	αs1-casein	19	A	I
EIVPNSAEERLHSMKEGIHA	αs1-casein	20	A	E
YLGYLEQLL	αs1-casein	9	L	Y
YLGYLEQ	αs1-casein	7	Q	Y
YLGYLEQL	αs1-casein	8	L	Y
VAPFPEVFG	αs1-casein	9	G	V
NLLRFFVAPFPEVFGKEKVNELSKDIGSEST	αs1-casein	31	T	N
FFVAPFPEV	αs1-casein	9	V	F
EGIHAQQKEPMIGVNQELAYFYPELFRQ	αs1-casein	28	Q	E
ERLHSMKEGIHAQQKEPMIGVNQE	αs1-casein	24	E	E
FYQLDAYPSGAWYYVPLGTQYTDAP	αs1-casein	25	P	F
RPKHPIKHQGLPQEVLNENLLR	αs1-casein	22	R	R
KVNELSKDIGSESTEDQAMEDIKQMEAESI	αs1-casein	30	I	K
IHAQQKEPMIGVNQELAYF	αs1-casein	19	F	I
EGIHAQQKEPMIGVNQELAYFYPELFRQFYQLDAYPSGAW	αs1-casein	40	W	E
PQLEIVPNSAEERLHSMKEGIHAQQKEPMIGVNQ	αs1-casein	34	Q	P
LHSMKEGIHAQQKEPMIGVNQELAYFYPEL	αs1-casein	30	L	L
YVPLGTQ	αs1-casein	7	Q	Y
LGYLEQL	αs1-casein	7	L	L
EKVNELS	αs1-casein	7	S	E
IGSESTEDQAMEDIKQMEAESISSSEEIVPNSVEQKHIQKEDV	αs1-casein	43	V	I
VNELSKDIGSESTEDQAMEDIKQMEAESISSSEEIVPNSVEQKHI	αs1-casein	45	I	V
HIQKEDVPSERYLGYLEQLLR	αs1-casein	21	R	H
PQLEIVPNSAEERLHSMKEGIHAQQKEPMIGVNQELAYF	αs1-casein	39	F	P
PSGAWYYVPLGTQYTDAPSFSDIPNPI	αs1-casein	27	I	P
FFVAPFPEVFGKEKVNELSK	αs1-casein	20	K	F
YYVPLGTQYTDAPSFSDIPNPIGSENSEKTTMPL	αs1-casein	34	L	Y
KHPIKHQGLPQEVLNENLLRFFVA	αs1-casein	24	A	K
ELAYFYPELFRQFYQLDAYPSGAWYYVPLGTQYTDAPSFS	αs1-casein	40	S	E
VPLGTQYTDAPSFSDIPNPIGSENSEKTTMPL	αs1-casein	32	L	V
PFPEVFGK	αs1-casein	8	K	P
QMEAESISSSEEIVPNSVEQKHI	αs1-casein	23	I	Q
EGIHAQQKEPMIGVNQELAYFYPELFR	αs1-casein	27	R	E
SSEEIVPNSVEQKHIQKE	αs1-casein	18	E	S
LNENLLRFFVAPFPEVFGKEKVNELSK	αs1-casein	27	K	L
EDQAMEDIKQMEAESISSSEEIVPNSVEQKHIQKEDVPSER	αs1-casein	41	R	E
APFPEVFGKEK	αs1-casein	11	K	A
GKEKVNELSKDIGSESTEDQAMEDIKQMEAESISSSEEIVPN	αs1-casein	42	N	G
EVLNENL	αs1-casein	7	L	E
RQFYQLDAYPSGAW	αs1-casein	14	W	R
AQQKEPMIGVNQELAYFYP	αs1-casein	19	P	A
SEEIVPNSVEQKHIQKEDVPSERYLGYLEQ	αs1-casein	30	Q	S
YQLDAYPSGAWYYVPLGTQYTDAPSFSDIPNPI	αs1-casein	33	I	Y
QMEAESISSSEEIVPNSVEQKHIQKEDVPSERYLGYLEQLL	αs1-casein	41	L	Q
SKDIGSESTEDQAMEDIKQMEA	αs1-casein	22	A	S
PNSAEERLHSMKEGIH	αs1-casein	16	H	P
FGKEKVNELSKDIGSESTEDQAMEDIKQMEAESISSSEEIVPNS	αs1-casein	44	S	F
PFPEVFG	αs1-casein	7	G	P
SDIPNPIGSEN	αs1-casein	11	N	S
PEVFGKEK	αs1-casein	8	K	P
IHAQQKEPMIGVNQEL	αs1-casein	16	L	I
FGKEKVNELSKDIGSESTEDQAMEDIKQMEAESI	αs1-casein	34	I	F
NENLLRFFVAPFPEVFGKEKVNELSKDIGSESTEDQAMEDIKQMEA	αs1-casein	46	A	N
HIQKEDVPSERYLGYLE	αs1-casein	17	E	H
FRQFYQLDAYPSGAWY	αs1-casein	16	Y	F
VEQKHIQKEDVPSE	αs1-casein	14	E	V
HQGLPQEV	αs1-casein	8	V	H
QLEIVPNSAEERLHSMKEGIHAQQKEPMIGVNQELAYF	αs1-casein	38	F	Q
APFPEVFGK	αs1-casein	9	K	A
SMKEGIHAQQKEPMIGVNQELAYFYPELFRQFYQLDA	αs1-casein	37	A	S
PSERYLGYLEQLLRLKKYKVPQLE	αs1-casein	24	E	P
FPEVFGKEKVNELSKDIGSESTEDQAMEDIKQ	αs1-casein	32	Q	F
KEPMIGVNQELAYFYPELFRQFYQLDAYP	αs1-casein	29	P	K
HSMKEGIHAQQKEPMIGVNQELAYFYPEL	αs1-casein	29	L	H
YPELFRQFY	αs1-casein	9	Y	Y
ENLLRFFVAPFPEVFGKEKVNELSKDIGSESTEDQAME	αs1-casein	38	E	E
ESTEDQAMEDIKQMEAESI	αs1-casein	19	I	E
DVPSERYLGYLEQLLRLKKYKVPQLEIVPNSA	αs1-casein	32	A	D
EVLNENLLRFFVAPFPEVFGKEKVNELSKDIGSESTEDQAMEDIKQMEAE	αs1-casein	50	E	E
IGVNQELAYFYPELF	αs1-casein	15	F	I
PQEVLNENLLRFFVAPFPEVFGKEKVNELSKDIG	αs1-casein	34	G	P
HIQKEDVPSERYL	αs1-casein	13	L	H
LEIVPNSAEERLHSMKEGIHA	αs1-casein	21	A	L
HSMKEGIHAQQKEPMIGVNQELAYFYPELFRQF	αs1-casein	33	F	H
QQKEPMIGVNQELAYFY	αs1-casein	17	Y	Q
LPQEVLNENLLRFFVAPFPEVFGKEKVNELSKDIGSES	αs1-casein	38	S	L
PEVFGKEKVNELSKDIGSEST	αs1-casein	21	T	P
KVPQLEIVPNSAEERLHS	αs1-casein	18	S	K
FRQFYQLDAYPSGAWYYVPLGTQYTDAPSF	αs1-casein	30	F	F
ESTEDQAMEDIKQMEAESISSSEEIVPNSVEQKHIQKEDVPSERYLGYLEQLLRL	αs1-casein	55	L	E
QAMEDIKQMEAESISSSEEIVPNSVEQKHIQKEDVPSERYLGYLEQLLRLK	αs1-casein	51	K	Q
VLNENLLRFFVAPFPEVFGKEKVNELSK	αs1-casein	28	K	V
ISSSEEIVPNSVEQKHIQKEDVPSE	αs1-casein	25	E	I
LAYFYPELFRQFYQLDAYPSGAWYYVPLGTQYTDAPSFSDIPNP	αs1-casein	44	P	L
ELSKDIGSESTEDQAMEDIKQME	αs1-casein	23	E	E
IVPNSVEQKHIQKEDVPSERYLGYLEQLLRLKKYKVPQLEIVPN	αs1-casein	44	N	I
TDAPSFSDIPNPIGSEN	αs1-casein	17	N	T
GIHAQQKEPMIGVNQELAYFYPELFRQFYQLDAYPSGA	αs1-casein	38	A	G
IKQMEAESISSSEEIVPNSVEQKHIQKEDVPSERYLG	αs1-casein	37	G	I
PIKHQGLPQEVLNENLLRFFVAPFPEVFGKEKVNELSKDIGSESTEDQA	αs1-casein	49	A	P
VAPFPEVFGKEKVNELSKDIGSESTEDQAMEDIKQMEAESISSSEEIVP	αs1-casein	49	P	V
FVAPFPEV	αs1-casein	8	V	F
SMKEGIHAQQKEPMIGVNQELAYFYP	αs1-casein	26	P	S
VEQKHIQKEDVPSERYLGYLEQLLRLKKYKVPQLEIVP	αs1-casein	38	P	V
KVPQLEIVPNSAEERLHSMKEGIHAQQKEPMIGVNQELAYFYPELF	αs1-casein	46	F	K
EIVPNSVEQKHIQKEDV	αs1-casein	17	V	E
LRFFVAPFPEVFGKEKVNELSKDIGS	αs1-casein	26	S	L
QQKEPMIGVNQELAYFYPELFRQFYQLDAYPSGAWYYVP	αs1-casein	39	P	Q
EDVPSER	αs1-casein	7	R	E
FYPELFRQ	αs1-casein	8	Q	F
WYYVPLGTQYTDAPSFSDIPNPIGSENSEKTTMP	αs1-casein	34	P	W
LRLKKYKVPQLEIVPNSAEERLHSMKEGIHAQQKEPMIGVNQELAYFYPELFRQFYQLDA	αs1-casein	60	A	L
PEVFGKEKVNELSKDIGS	αs1-casein	18	S	P
EQLLRLKKYKVPQLEIVPNSAEERLHSMKEGIHAQQKEPMIGVNQE	αs1-casein	46	E	E
HSMKEGIHAQQKEPMIGVNQELAYFYPELFRQFYQLDAYPSG	αs1-casein	42	G	H
TDAPSFSDIPNPIGSENSEKT	αs1-casein	21	T	T
EVFGKEKVNELSKDIGSESTEDQAMEDIKQME	αs1-casein	32	E	E
PSERYLGYLEQLLRLKKYKVPQLEIVPNSAEERLHSMK	αs1-casein	38	K	P
PFPEVFGKEKVNELSKDIGSESTEDQAMEDIKQM	αs1-casein	34	M	P
IKHQGLPQEVLNENLLRFFVA	αs1-casein	21	A	I
ELAYFYPELFRQFYQLDAYPSGAWYYVPLGTQYTDAPSFSD	αs1-casein	41	D	E
VPNSVEQKHIQ	αs1-casein	11	Q	V
LKKYKVPQLEIVPNSAE	αs1-casein	17	E	L
MKEGIHAQQKEPMIGVNQELAYF	αs1-casein	23	F	M
NELSKDIGSESTEDQAMEDIKQMEAESISSSEEIVP	αs1-casein	36	P	N
PNSVEQKHIQKEDVPS	αs1-casein	16	S	P
GVNQELAYFYPELFRQFY	αs1-casein	18	Y	G
KQMEAESISSSEEIVPNSV	αs1-casein	19	V	K
QEVLNENLLRFFVAPFPEVFGKEKVNELSKDIG	αs1-casein	33	G	Q
LSKDIGSESTEDQAMEDIKQMEAES	αs1-casein	25	S	L
RFFVAPFPEVFGKEKVNELSK	αs1-casein	21	K	R
VFGKEKVNELSKDIGSESTEDQAMEDIKQMEAE	αs1-casein	33	E	V
LRFFVAPFPEVFGKEKVNELSKDIGSESTEDQAMEDIKQME	αs1-casein	41	E	L
IHAQQKEPMIGVNQELAYFYPELFRQFYQLDAYPSGAWYY	αs1-casein	40	Y	I
ELAYFYPELFRQFYQLDAYPSGAWYYV	αs1-casein	27	V	E
MKEGIHAQQKEPMIGVNQELAYFYPELFRQFYQLDAYPS	αs1-casein	39	S	M
LKKYKVPQLEIVPNSAEERLHSMKEGIHAQQK	αs1-casein	32	K	L
HSMKEGIHAQQKEPMIGVNQELAYFYPELFRQFYQLDAYPSGAWYY	αs1-casein	46	Y	H
SENSEKTTMPLW	αs1-casein	12	W	S
EVLNENLLRFFVAPFPEVFGKEKVNELSKDIGSESTEDQAMEDIKQME	αs1-casein	48	E	E
SESTEDQAMEDIKQMEAESISSSEEIVPNSVE	αs1-casein	32	E	S
YFYPELFRQFYQLDAYPSGAWYYVPL	αs1-casein	26	L	Y
GIHAQQKEPMIGV	αs1-casein	13	V	G
ERLHSMKEGIHAQQKEPMIGVNQEL	αs1-casein	25	L	E
GKEKVNELSK	αs1-casein	10	K	G
QKHIQKEDVPSERYLGYLEQLLRLKKYKVPQLEIVPNSAEE	αs1-casein	41	E	Q
STEDQAMEDIKQMEAESISSSE	αs1-casein	22	E	S
NENLLRFFVAPFPEVFGKEKVNELSKDIGSESTEDQAMEDIKQMEAESISSSEE	αs1-casein	54	E	N
QKEPMIGVNQELAYFYPELFRQFYQ	αs1-casein	25	Q	Q
TEDQAMEDIKQMEAESISSSEEIVPNSVEQKHIQKED	αs1-casein	37	D	T
QFYQLDAYPSGAWYYVPLGT	αs1-casein	20	T	Q
PQLEIVPNSAEERLHSMKEGIHAQQKEPMIGVNQE	αs1-casein	35	E	P
FSDIPNPIGSENSEKTTMPLW	αs1-casein	21	W	F
VPNSAEERLHSMKEGIHAQQKEPMIGVNQELA	αs1-casein	32	A	V
SMKEGIHAQQKEPMIGVNQE	αs1-casein	20	E	S
KDIGSESTEDQAMEDIKQMEAESI	αs1-casein	24	I	K
ESISSSEEIVPNSVEQKHIQKEDVPS	αs1-casein	26	S	E
KDIGSESTEDQAMEDIKQMEAESISSSEEIVPNSVEQKHIQKEDVPSERYLGYLEQLLR	αs1-casein	59	R	K
VFGKEKVNELSKD	αs1-casein	13	D	V
EVLNENLLRFFVAPFPEVFGKEKV	αs1-casein	24	V	E
EDIKQMEAESISSSEEIVPNSVEQK	αs1-casein	25	K	E
RFFVAPFPEVFGKEKVNELSKDIGSESTEDQAM	αs1-casein	33	M	R
KEPMIGVNQELAYFYPELFRQFYQLDAYPSGAWYYVPLGTQYTDAPSFS	αs1-casein	49	S	K
GYLEQLL	αs1-casein	7	L	G
FYPELFRQFYQLDAYPSGAWYYVPLGTQ	αs1-casein	28	Q	F
GIHAQQKEPMIGVNQELAYFYPELFRQFYQLDAYPSGAWYYVPLGTQYTDA	αs1-casein	51	A	G
SESTEDQAMEDIKQMEAESISSSEEIVPNSVEQKHIQKEDVPSER	αs1-casein	45	R	S
GIHAQQKEPMIGVNQELA	αs1-casein	18	A	G
KEPMIGVNQELAYFYPELFRQFYQLDAYPSGAWYYVPL	αs1-casein	38	L	K
LHSMKEGIHAQQKEPMIGVNQELAYFYPELFRQFYQLDAYPSGAWYYVPLGTQ	αs1-casein	53	Q	L
AMEDIKQMEAESISSSEEIVPNSVEQKH	αs1-casein	28	H	A
EIVPNSVEQKHIQKEDVPSERYLGYLEQLLRLKKYKVPQLEIVPNSA	αs1-casein	47	A	E
LSKDIGSESTEDQAMEDIKQ	αs1-casein	20	Q	L
WYYVPLGTQYTDAP	αs1-casein	14	P	W
LSKDIGSESTEDQAMEDIKQMEAESISSSEEIVPNSVEQKHIQKEDVPSERYLGYLEQL	αs1-casein	59	L	L
LAYFYPELFRQFYQLDAYPS	αs1-casein	20	S	L
LPQEVLNENL	αs1-casein	10	L	L
DAPSFSDIPNPIGSENSEK	αs1-casein	19	K	D
SEEIVPNSVEQKHI	αs1-casein	14	I	S
MKEGIHAQQKEPMIGVNQELAYFYPELFRQFYQLD	αs1-casein	35	D	M
QFYQLDAYPSGAWYYVPLGTQY	αs1-casein	22	Y	Q
AMEDIKQMEAESISSSEEIVPNSVEQKHIQK	αs1-casein	31	K	A
SVEQKHIQKEDVPSERYLGYLEQLLRLKKYKVPQLEIVPNSAEERLHSMKEGIHAQQKE	αs1-casein	59	E	S
ELFRQFYQLDAYPSGAWYYVPL	αs1-casein	22	L	E
QGLPQEVLNE	αs1-casein	10	E	Q
PNSVEQKHIQKEDVPSERYL	αs1-casein	20	L	P
PQEVLNENLLRFFVAPFPEVFGKEKVNELSKDIGSESTEDQAMED	αs1-casein	45	D	P
DVPSERYLGYLEQLLRLKKYKVPQLEIVP	αs1-casein	29	P	D
ELFRQFYQLDAYPSGAWYYVPLGTQYTDAPSFSDIPNP	αs1-casein	38	P	E
NENLLRFFVAP	αs1-casein	11	P	N
ESTEDQAMEDIKQMEAESISSSEEIVPNSVEQKHIQKEDV	αs1-casein	40	V	E
LEIVPNSAEER	αs1-casein	11	R	L
AYFYPELFRQFYQLDAYPSGAWYYV	αs1-casein	25	V	A
SKDIGSESTEDQAMEDIKQMEAES	αs1-casein	24	S	S
SAEERLHSMKEGIHAQQKEPMI	αs1-casein	22	I	S
KHIQKEDVPSERYLGYLE	αs1-casein	18	E	K
GYLEQLLRLKKYKVPQLEIVPNSA	αs1-casein	24	A	G
VNELSKDIGSESTEDQAMEDIKQMEAESISSSEEIVPNSVEQKHIQKE	αs1-casein	48	E	V
QKEDVPSERYLGYLEQL	αs1-casein	17	L	Q
AESISSSEEIVPNSVEQKHIQKEDVPSERYLGYLEQLLR	αs1-casein	39	R	A
PFPEVFGKEKVNELSKDIGSESTEDQAMEDIKQMEAESISSSEEIVPNSVEQKHI	αs1-casein	55	I	P
FPEVFGKEKVNELSKDIGSESTEDQAME	αs1-casein	28	E	F
HSMKEGIHAQQKEPMIGVNQEL	αs1-casein	22	L	H
KYKVPQLEIVPNSAEERLHSMKEGIHAQQKEPMIGVNQELA	αs1-casein	41	A	K
SVEQKHIQKEDVPSERYLGYLEQLLRLKKYKVPQLEIVPNSAEERLHSMKEGI	αs1-casein	53	I	S
QQKEPMIGVNQELAYFYPELFRQFYQLDAYPSGA	αs1-casein	34	A	Q
KQMEAESISSSEEIVPNSVEQKHIQKEDVPSERYLGYLEQLLRLKKYKVPQLEIVPNS	αs1-casein	58	S	K
SSSEEIVPNSVEQKHIQKEDVPSERYLGYLEQLLR	αs1-casein	35	R	S
YQLDAYPSGAWYYVPLGTQYTDAPSFSDIPNP	αs1-casein	32	P	Y
VPSERYLGYLEQ	αs1-casein	12	Q	V
FRQFYQLDAYPSGAWYYVPLGTQYTDAP	αs1-casein	28	P	F
GSESTEDQAMEDIKQMEAESISSSEEIVPNSVEQKHIQKEDVPSERYLGYLEQLLR	αs1-casein	56	R	G
KEKVNELSKDIGSESTEDQAMEDIKQMEAESISSS	αs1-casein	35	S	K
FPEVFGKEKVNELSKDIGSESTEDQAMEDIKQMEAESISSSEEI	αs1-casein	44	I	F
FPEVFGKEKVNELSKDIGSESTE	αs1-casein	23	E	F
ESISSSEEIVPNSVEQKHIQKEDVPSERYLGYLEQLLRLKKYK	αs1-casein	43	K	E
QLEIVPNSAEERLHSMKEGIHAQQKEPMIG	αs1-casein	30	G	Q
MEDIKQMEAESISSSEEIVPNSVEQKHIQKEDVPSERYLGYLEQLLRLKKYKVPQL	αs1-casein	56	L	M
PFPEVFGKEKVNELSKDIGSES	αs1-casein	22	S	P
MEAESISSSEEIVPNSVEQKHIQKE	αs1-casein	25	E	M
AYFYPELFRQFYQLDAYPSGAWYYVPLGTQYTDAPSFS	αs1-casein	38	S	A
ERLHSMKEGIHAQQKEPMIGVNQELAYFYPELFRQFYQLDAYPSGAWYY	αs1-casein	49	Y	E
EVLNENLLRFFVAPFPEVFGKEKVNELSKDIGSESTEDQAME	αs1-casein	42	E	E
FPEVFGKEK	αs1-casein	9	K	F
VAPFPEVFGKEKVNELSKDIGSESTEDQAMEDIKQMEAESISSSEEIVPNSVEQ	αs1-casein	54	Q	V
EIVPNSVEQ	αs1-casein	9	Q	E
DQAMEDIKQMEAESISSSEEIVPNSV	αs1-casein	26	V	D
KDIGSESTEDQAMEDIKQMEAESISSSEEIVPNSVEQKHIQKE	αs1-casein	43	E	K
LGYLEQLLRLKKYKVPQLEIVPNSAEERLHS	αs1-casein	31	S	L
RQFYQLDAYPSGAWYYVPL	αs1-casein	19	L	R
LFRQFYQLDAYPSGAWYYVPLGTQYTDAPSFSDIPNPIGSENSEKTT	αs1-casein	47	T	L
VPQLEIVPNSAEERLHSM	αs1-casein	18	M	V
GKEKVNELSKDIGSESTEDQAMEDIKQMEAESISSSEEIVPNSVE	αs1-casein	45	E	G
PIKHQGLPQEVLNENLLRFFVAPFPEVFGKEKVNEL	αs1-casein	36	L	P
SISSSEEIVPNSVEQKHIQKEDVPSERYLG	αs1-casein	30	G	S
YPELFRQFYQLDAYPSGAWYYVPLGTQ	αs1-casein	27	Q	Y
IGVNQELAYFYPELFRQFYQLDAYPSGAWYYVPLGTQYTDAPSF	αs1-casein	44	F	I
FRQFYQLDAYPSGAWYY	αs1-casein	17	Y	F
MEAESISSSEEIVPNSVEQKHIQKEDVPSERYLGYLEQLLR	αs1-casein	41	R	M
ELSKDIGSESTEDQAMEDIKQMEAESISSSEEIVPNSVEQKHIQKEDVPSE	αs1-casein	51	E	E
STEDQAMEDIKQMEAESISSSEEIVPNSVEQKHIQKEDVPSERYLGYL	αs1-casein	48	L	S
FVAPFPEVFGKEKVNELSKDIGSESTEDQAMEDI	αs1-casein	34	I	F
ERLHSMKEGIHAQQKEPMI	αs1-casein	19	I	E
HIQKEDVPSERYLGYLEQLLRLKKYKV	αs1-casein	27	V	H
YLEQLLRLKKYKVPQLEIVPNSAEERLHSMKEGIHAQQKEP	αs1-casein	41	P	Y
KEDVPSERYLGYLEQLLRLKKYKVPQLEIVPNSA	αs1-casein	34	A	K
MKEGIHAQQKEPMIGVNQELAYFYPELFRQFYQLDAY	αs1-casein	37	Y	M
SMKEGIHAQQKEPMIGVNQELAYFYPELF	αs1-casein	29	F	S
DIGSESTEDQAMEDIKQMEAESISSSEEIVPNSVEQKHIQKEDVPSE	αs1-casein	47	E	D
VNQELAYFYPELFRQFYQLDAYPSGAWYYVPLGTQYTDAPSFSDIPNPIGSENSE	αs1-casein	55	E	V
GKEKVNELSKDIGSESTED	αs1-casein	19	D	G
YLGYLEQLLRLKKYKVPQLEIVPNSAEERLHSM	αs1-casein	33	M	Y
SEEIVPNSVEQKHIQKEDVPS	αs1-casein	21	S	S
EVFGKEKVNELSKDIGSESTEDQAMEDIKQM	αs1-casein	31	M	E
QLDAYPSGAW	αs1-casein	10	W	Q
NSAEERLHSMKEGIHAQQKEPMIGVNQELAYFYPELFRQFYQLDAYPSGAWYYVPLGTQY	αs1-casein	60	Y	N
PSERYLGYLEQLL	αs1-casein	13	L	P
IKQMEAESISSSEEIVPNSVEQKHIQKEDVPSERYLGYLEQ	αs1-casein	41	Q	I
SISSSEEIVPNSVEQKHIQKEDVPSERYLGYLE	αs1-casein	33	E	S
QFYQLDAYPSGAWYYVPLGTQYTDAP	αs1-casein	26	P	Q
ELAYFYPELFRQFYQLDAYPSGAWYYVPLGTQYTDAPSFSDIPNP	αs1-casein	45	P	E
QMEAESISSSEEIVPNSVEQKHIQ	αs1-casein	24	Q	Q
EAESISSSEEIVPNSVEQKHIQKEDVPSERYLGYLEQLLRLKK	αs1-casein	43	K	E
SSSEEIVPNSVEQKHIQKEDV	αs1-casein	21	V	S
YLGYLEQLLRLKKYKVPQLEIVPNSAEER	αs1-casein	29	R	Y
EIVPNSAEERLHSMKEGIHAQQKEPMI	αs1-casein	27	I	E
GSESTEDQAMEDIKQMEAESISSSEEIVP	αs1-casein	29	P	G
EPMIGVNQELAYFYPE	αs1-casein	16	E	E
LPQEVLNENLLRFFVAPFPEVFGKEKVNELSKDIGSESTEDQAMEDIKQMEAESISS	αs1-casein	57	S	L
AYFYPELFRQFYQLDAYPSGAWYYVPLGTQYT	αs1-casein	32	T	A
NENLLRFFVAPFPEVFGKEKVNELSKDIGSESTEDQ	αs1-casein	36	Q	N
FPEVFGK	αs1-casein	7	K	F
IGSESTEDQAMEDIKQMEAESISSSEEIVPNSVEQKHIQKEDVP	αs1-casein	44	P	I
LAYFYPELFRQFYQLDAYPSGAWY	αs1-casein	24	Y	L
VEQKHIQKEDVPSERYLGYLEQLLRLK	αs1-casein	27	K	V
NELSKDIGSESTEDQAMEDIKQMEAESISSSEEIVPNSVE	αs1-casein	40	E	N
YYVPLGTQYTDAPSFSDIPNPIGSENSEK	αs1-casein	29	K	Y
LPQEVLNEN	αs1-casein	9	N	L
EVFGKEKVNE	αs1-casein	10	E	E
SISSSEEIVPNSVEQKHIQKEDVPSERYLGYLEQLLRLKKYKVP	αs1-casein	44	P	S
QGLPQEVLNENLLRFFVAPFPEVFGKEKVNELSKDIGS	αs1-casein	38	S	Q
NSVEQKHIQKEDVPSERYLGYLEQLLRLKKYKVPQLEIVPNSAEERLHSMKEGIHAQQK	αs1-casein	59	K	N
EIVPNSVEQKHIQKEDVPSERYLGYLEQLLRLKKYKVPQLEIVPNSAEERLHSMKEGIH	αs1-casein	59	H	E
QGLPQEVLNENLLRFFVAPFPEVFGKEKVNELSKDIGSESTEDQAMEDIKQME	αs1-casein	53	E	Q
EQKHIQKEDVPSE	αs1-casein	13	E	E
QFYQLDAYPSGAWYYVPLGTQYT	αs1-casein	23	T	Q
QLLRLKKYKVPQLEIVPNSAEERLHSMKEGIHAQQKEPMIGVNQELAYFYPELF	αs1-casein	54	F	Q
GKEKVNELSKDIGSES	αs1-casein	16	S	G
HIQKEDVPSERYLGYLEQLLRLKKYKVPQLEI	αs1-casein	32	I	H
AQQKEPMIG	αs1-casein	9	G	A
VPSERYLGYLEQLLR	αs1-casein	15	R	V
PSFSDIPNPIGSE	αs1-casein	13	E	P
VPSERYLGYLEQLLRLKKYKVPQLEIVPNSAEERLHSMKEGIHAQQK	αs1-casein	47	K	V
GSESTEDQAMEDIKQMEAESISSS	αs1-casein	24	S	G
MKEGIHAQQKEPMIGVNQELAYFYPELFRQFYQ	αs1-casein	33	Q	M
YQLDAYPSGAWYYVPLGTQYTDAPSFSDIPNPIGSENSE	αs1-casein	39	E	Y
KVPQLEIVPNSAEERLHSMKEGIHAQQKEPMIGVN	αs1-casein	35	N	K
IQKEDVPSERYLGYLEQLLRLKKYKVPQLEIVPNSAEERLHSM	αs1-casein	43	M	I
VNQELAYFYPELFRQFY	αs1-casein	17	Y	V
YQLDAYPSGAWYYVPLGTQYTDAPSF	αs1-casein	26	F	Y
IGSESTEDQAMEDIKQMEAESISSSEEIVPNSVEQKHIQKEDVPS	αs1-casein	45	S	I
APFPEVFGKEKVNELSKDIGSESTEDQAME	αs1-casein	30	E	A
SEEIVPNSVEQKHIQKEDVPSERYLGYLEQLLRLKKYKVPQLEIVPNS	αs1-casein	48	S	S
FYQLDAYPSGAWYYVPLGTQYTD	αs1-casein	23	D	F
KQMEAESISSSEEIVPNSVEQKHIQKEDVPS	αs1-casein	31	S	K
EQLLRLKKYKVPQLEIVPNSAEERLHSMKEGIHA	αs1-casein	34	A	E
VFGKEKVNELSKDIGSESTEDQAMEDIKQME	αs1-casein	31	E	V
TEDQAMEDIKQMEAESISSSEEIVPNSVEQKHIQKEDVPSERYLGYLEQLL	αs1-casein	51	L	T
SVEQKHIQKEDVPSERYLGYLEQLLRLKK	αs1-casein	29	K	S
RLKKYKVPQLEIVPNSAEERLHSMKEGIHAQQKEPMIGVNQELAYF	αs1-casein	46	F	R
APSFSDIPNPIGSENSEKTTMPLW	αs1-casein	24	W	A
VEQKHIQKEDVPSERYLG	αs1-casein	18	G	V
NSVEQKHIQKEDVPSERYLGYLEQLLRLKKYKVPQLEIVPNSAEE	αs1-casein	45	E	N
EDIKQMEAESISSSEEIVPNSVEQKHIQKEDVPSERYLGYLEQLLRLKKYKVP	αs1-casein	53	P	E
ESISSSEEIVPNS	αs1-casein	13	S	E
SMKEGIHAQQKEPMIGVNQELAYFYPELFRQFYQLDAYPSGAWYYVPLGTQYTDA	αs1-casein	55	A	S
QAMEDIKQMEAESISSSEE	αs1-casein	19	E	Q
IGVNQELAYFYPELFRQFYQLDAYPSGAWYY	αs1-casein	31	Y	I
YYVPLGTQYTDAPSFSDIPNPIGSENSEKTT	αs1-casein	31	T	Y
APFPEVFGKEKVNELSKDIGSESTEDQAMEDIKQMEA	αs1-casein	37	A	A
ELSKDIGSESTEDQAMEDIK	αs1-casein	20	K	E
GLPQEVLNENLLRFFVAPFPEVF	αs1-casein	23	F	G
QEVLNENLLRFFVAPFPEVFGKEKVNELSKDIGSES	αs1-casein	36	S	Q
KVPQLEIVPNSAEERLHSMKEG	αs1-casein	22	G	K
EPMIGVNQELAYFYPELFRQFY	αs1-casein	22	Y	E
LNENLLRFFVAP	αs1-casein	12	P	L
AQQKEPMIGVNQELAYFYPELFRQFYQ	αs1-casein	27	Q	A
PKHPIKHQGLPQEVLNE	αs1-casein	17	E	P
RQFYQLDAYPSGAWYYVPLGTQYTDAPSFSDIP	αs1-casein	33	P	R
MEDIKQMEAESISSSEE	αs1-casein	17	E	M
GLPQEVLNENLLRFFVAPFPEVFGKEKVNELSKDIGSEST	αs1-casein	40	T	G
YPELFRQFYQLDAYP	αs1-casein	15	P	Y
VEQKHIQKEDVPSERYLGYLEQLLRLKKYKV	αs1-casein	31	V	V
EAESISSSEEIVPNSVEQKHIQKEDVPSERYLGYLE	αs1-casein	36	E	E
SAEERLHSMKEGIHAQQKE	αs1-casein	19	E	S
EAESISSSEEIVPNSVEQK	αs1-casein	19	K	E
YLGYLEQLLRLKKYKVPQLEIVPNSAEERLHS	αs1-casein	32	S	Y
KHQGLPQEVLNENLLRFFVAPFPEVFGKEKVNEL	αs1-casein	34	L	K
GAWYYVPLGTQYTDAPSFSDIPNP	αs1-casein	24	P	G
PQEVLNENLLRFFVAPFPEV	αs1-casein	20	V	P
EEIVPNSVEQKHIQKEDVP	αs1-casein	19	P	E
LHSMKEGIHAQQKEPMIGVNQELAYFYPELFRQFYQLD	αs1-casein	38	D	L
AEERLHSMKEGIHAQQKEPMIGVNQELAYFYPELF	αs1-casein	35	F	A
LGYLEQLLRLKKYKVPQLEIVPNSAEERLHSMKEGIHAQQKEPMIG	αs1-casein	46	G	L
VPNSAEERLHSMKEGIHAQQKEPMIGVNQELAYFYPELFRQFYQL	αs1-casein	45	L	V
QAMEDIKQMEAESISSSEEIV	αs1-casein	21	V	Q
LFRQFYQLDAYPSGAWYYVPLGTQYTDAPSFSDIPNPIGS	αs1-casein	40	S	L
PQEVLNENL	αs1-casein	9	L	P
HQGLPQEVLNENLLR	αs1-casein	15	R	H
ISSSEEIVPNSVEQKHIQKEDVPSERYLGYLEQLLRLKKYKVPQL	αs1-casein	45	L	I
SVEQKHIQKEDVPSERYLGYLEQLLRLKKYKVPQLEIVPNSA	αs1-casein	42	A	S
PNPIGSENSEKTTMPL	αs1-casein	16	L	P
SKDIGSESTEDQAMEDIKQMEAESISSSEEIVPNSVEQKHIQKE	αs1-casein	44	E	S
DIGSESTEDQAMEDIKQMEAESISSSEEIVPNSVEQKHIQKEDV	αs1-casein	44	V	D
SGAWYYVPLGTQYTD	αs1-casein	15	D	S
GIHAQQKEPMIGVNQELAYFYPELFRQFYQL	αs1-casein	31	L	G
NLLRFFVAPFPEVFGKEKVNELSKDIGSESTEDQAMEDIKQMEAESISSSE	αs1-casein	51	E	N
EERLHSMKEGIHAQQKEPMIGV	αs1-casein	22	V	E
FRQFYQLDAYPSGAWYYVPLGTQYTDAPSFSDIPNPIG	αs1-casein	38	G	F
KHQGLPQEVLNENLLRFFVAPFPEV	αs1-casein	25	V	K
QQKEPMIGVNQELAYFYPELFRQFYQLDAYPSGAWYYVPLGTQYTD	αs1-casein	46	D	Q
QLLRLKKYKVPQLEIVPNSAEERLHSMKEG	αs1-casein	30	G	Q
LHSMKEGIHAQQKEPMIGVNQELAYFYPELFRQFYQLDAYPSGAWYYVPLGTQYTDAPS	αs1-casein	59	S	L
FVAPFPEVFGKEKVNELSKDIGSESTEDQAME	αs1-casein	32	E	F
PMIGVNQELAYFYPELFRQFYQLDAYPSGAWYYVPLGTQYTDAPS	αs1-casein	45	S	P
DVPSERYLGYLEQLLRLKKYKVPQLEIVPNS	αs1-casein	31	S	D
GKEKVNELSKDIGSESTEDQAMEDIKQMEAESISSSEEIVPNSVEQKHIQKEDVPSERYL	αs1-casein	60	L	G
QELAYFYPELFRQFYQLDAYPSGAWYYVPLGTQ	αs1-casein	33	Q	Q
AQQKEPMIGVNQELAYF	αs1-casein	17	F	A
MEAESISSSEEIVPNSVEQKHIQKEDVP	αs1-casein	28	P	M
IKHQGLPQEVLNENLLRFFVAPFPEVFGKEKVNEL	αs1-casein	35	L	I
VPNSVEQKHIQKEDVPSERYLGYLEQLLRLKKYKVPQLEIVPNSAEERLHSMKEGIHAQ	αs1-casein	59	Q	V
RQFYQLDAYPSGAWYYVPLGTQYTDAPS	αs1-casein	28	S	R
KKYKVPQLEIVPNSAEERLHSMK	αs1-casein	23	K	K
VEQKHIQKEDVPSERYLGYLEQLL	αs1-casein	24	L	V
IGSESTEDQAMEDIKQMEAESISSSEEIVPNSVEQKHI	αs1-casein	38	I	I
RYLGYLEQLLRLKKYKVPQLEIVPNSAEERLHS	αs1-casein	33	S	R
LTEEEKNRLNFL	αs2-casein	12	L	L
LTEEEKNRLNFLK	αs2-casein	13	K	L
TKLTEEEKNRLNFL	αs2-casein	14	L	T
LTEEEKNRLNFLKK	αs2-casein	14	K	L
ISQRYQKFALPQYLKTVYQHQKAMKPWIQ	αs2-casein	29	Q	I
TKLTEEEKNRLN	αs2-casein	12	N	T
LTEEEKNRLN	αs2-casein	10	N	L
HYQKALNEINQFYQKFP	αs2-casein	17	P	H
NAVPITPTLN	αs2-casein	10	N	N
LYQGPIVLNPWDQVK	αs2-casein	15	K	L
LYQGPIVLNPWDQV	αs2-casein	14	V	L
LTEEEKNRLNF	αs2-casein	11	F	L
ALNEINQFYQKFPQYLQ	αs2-casein	17	Q	A
ALNEINQFYQKFPQ	αs2-casein	14	Q	A
ALNEINQFYQKFPQYL	αs2-casein	16	L	A
YQKFALPQYL	αs2-casein	10	L	Y
EEKNRLNFLKKISQRY	αs2-casein	16	Y	E
LSTSEENSKKTVDME	αs2-casein	15	E	L
KKTVDMESTEVFTKKTKLT	αs2-casein	19	T	K
TPTLNREQLSTSEENSKKTVDMESTEVFTK	αs2-casein	30	K	T
KFPQYLQYLYQGPIVLNPWDQVKRNAV	αs2-casein	27	V	K
NQFYQKFPQYLQYLYQGPI	αs2-casein	19	I	N
IISQETYKQEK	αs2-casein	11	K	I
VATEEVKITVDDKHYQKALNEI	αs2-casein	22	I	V
AINPSKENLCSTFCKEVVRN	αs2-casein	20	N	A
CKEVVRNANEEEYSIGSSS	αs2-casein	19	S	C
PWDQVKRNAVPITPTLNREQLSTS	αs2-casein	24	S	P
ENSKKTVDME	αs2-casein	10	E	E
PQYLKTVYQHQKAMKPWIQPKTKVI	αs2-casein	25	I	P
EEEKNRLNFLKKISQRYQKFALPQYLKTV	αs2-casein	29	V	E
FALPQYLKTVYQHQKAMKPW	αs2-casein	20	W	F
EVFTKKTKLTEEEKNRLNFLKKISQRYQKF	αs2-casein	30	F	E
YQKFALPQYLK	αs2-casein	11	K	Y
LYQGPIVLNPWDQVKRNAV	αs2-casein	19	V	L
KHYQKALNEINQF	αs2-casein	13	F	K
ITVDDKHYQKALNEINQFYQKFPQYLQY	αs2-casein	28	Y	I
NEEEYSIGSSSEESAEVAT	αs2-casein	19	T	N
ESAEVATEEVKITVDDKHYQ	αs2-casein	20	Q	E
VATEEVKITVDDKHYQKALNEINQ	αs2-casein	24	Q	V
PITPTLNREQLSTSEENSK	αs2-casein	19	K	P
NSKKTVDMESTEVFTKKTKLTEE	αs2-casein	23	E	N
EVVRNANEEEYSIGSS	αs2-casein	16	S	E
ALNEINQFYQKFPQYLQYLYQ	αs2-casein	21	Q	A
QKFPQYLQYLYQGPI	αs2-casein	15	I	Q
QKFALPQYLKTVYQHQKA	αs2-casein	18	A	Q
NEINQFYQKFPQYLQYLYQGPIVLNPW	αs2-casein	27	W	N
VKITVDDKHYQKALNEI	αs2-casein	17	I	V
YQKALNEINQFYQKFPQYLQYLYQGP	αs2-casein	26	P	Y
FPQYLQYLYQGPIVLNPWDQVKRN	αs2-casein	24	N	F
ETYKQEKNMAINPSKENLCSTFCKEVVRN	αs2-casein	29	N	E
QYLQYLYQGPIVLNPWDQVKRN	αs2-casein	22	N	Q
ALNEINQFYQKFPQYLQYLYQGPIVLNPWDQVK	αs2-casein	33	K	A
AMKPWIQPK	αs2-casein	9	K	A
TKLTEEEKNRLNFLKK	αs2-casein	16	K	T
ATEEVKITVDDK	αs2-casein	12	K	A
FALPQYL	αs2-casein	7	L	F
TKVIPYV	αs2-casein	7	V	T
NAVPITPT	αs2-casein	8	T	N
EESAEVATEEVKITVDDKHYQK	αs2-casein	22	K	E
ENSKKTVDMESTEVFTKKTKLTEEE	αs2-casein	25	E	E
YKQEKNMAINPSKENLCSTFCKEVVRNANEEEYSIGSSSEESAEV	αs2-casein	45	V	Y
FALPQYLK	αs2-casein	8	K	F
MKPWIQPK	αs2-casein	8	K	M
SEESAEVATEEVKIT	αs2-casein	15	T	S
QVKRNAVPITPTLNREQL	αs2-casein	18	L	Q
KPWIQPK	αs2-casein	7	K	K
AEVATEEVKITVDDK	αs2-casein	15	K	A
NFLKKISQ	αs2-casein	8	Q	N
VVRNANEEEYSIGSSSEESAEVATEEVK	αs2-casein	28	K	V
TYKQEKNMAINPSKENLCSTFCKEVVRNANEEE	αs2-casein	33	E	T
AVPITPTLNREQLSTSEENS	αs2-casein	20	S	A
PQYLKTVYQHQKAMKPWIQPKTK	αs2-casein	23	K	P
YQKFALPQYLKTVYQHQ	αs2-casein	17	Q	Y
NANEEEY	αs2-casein	7	Y	N
PTLNREQLSTSEENSKKTVDMESTEVFTKKTKLTEEEKNRLN	αs2-casein	42	N	P
KITVDDKHYQKALNEINQFYQKFPQYLQYLYQGPIVLNPWDQVKRNAVPITPTLNREQLS	αs2-casein	60	S	K
NTMEHVSSSEESIISQETYKQE	αs2-casein	22	E	N
TVYQHQK	αs2-casein	7	K	T
SSSEESAEVATEEVKITVDDKHYQKALNEINQFYQKFPQ	αs2-casein	39	Q	S
TEEEKNRLNFLKK	αs2-casein	13	K	T
TVDDKHYQKALNEINQFYQK	αs2-casein	20	K	T
SQRYQKFALPQYLKTVYQHQKAMKPWIQPKTKVIPYV	αs2-casein	37	V	S
EVVRNANEEEYSIGSSSEESAEVATEE	αs2-casein	27	E	E
CSTFCKEVVRNANEEEYS	αs2-casein	18	S	C
EINQFYQKFPQYLQYLYQGPIVLNPWDQVKRN	αs2-casein	32	N	E
NLCSTFCKEVVRNANEEEYSIGSSSEE	αs2-casein	27	E	N
NLCSTFCKEVVRNANEEEYSIGSSSEESAEV	αs2-casein	31	V	N
YQKFALPQ	αs2-casein	8	Q	Y
ESIISQET	αs2-casein	8	T	E
YLQYLYQGPIVLNPWDQVKRNAVPITPTLNREQL	αs2-casein	34	L	Y
QFYQKFPQ	αs2-casein	8	Q	Q
NMAINPS	αs2-casein	7	S	N
ISQETYKQEKNMAINPSKENLCSTFCKEV	αs2-casein	29	V	I
ALPQYLKTVYQHQKAMKPWIQPKTKVIPYVRYL	αs2-casein	33	L	A
INQFYQKFPQYLQYLYQGPI	αs2-casein	20	I	I
ITVDDKHYQ	αs2-casein	9	Q	I
ENLCSTFCKEVVRNANEEEYSIGSSSEESAEV	αs2-casein	32	V	E
FALPQYLKT	αs2-casein	9	T	F
KQEKNMAINPSKENLCSTFCKEVVRNANEEEYSIGSSSEESAE	αs2-casein	43	E	K
LNREQLSTSEENSKKTVDM	αs2-casein	19	M	L
TFCKEVVRNANEEEYSIGSSSEESAEVA	αs2-casein	28	A	T
NMAINPSKENLCSTFCKEVVRNAN	αs2-casein	24	N	N
ENSKKTVDMESTEVFTKKTK	αs2-casein	20	K	E
VDMESTEVFTKKTKLTEEEKNRLNFLKKISQRYQKF	αs2-casein	36	F	V
ESIISQETYKQEKNMAIN	αs2-casein	18	N	E
QYLYQGPIVLNPWDQ	αs2-casein	15	Q	Q
DQVKRNAVPITPTLNREQLSTSEENSKKTVDMESTEVFTKKTKLTEEEKNRLNFLKKIS	αs2-casein	59	S	D
HVSSSEESIISQE	αs2-casein	13	E	H
KEVVRNANEEEYSIGSS	αs2-casein	17	S	K
STEVFTKKTKLTEEEKNRLNFLKKISQRYQKFALPQYLKTVYQHQK	αs2-casein	46	K	S
KTKLTEEEKNRLNFLKKISQRYQKFALPQ	αs2-casein	29	Q	K
KENLCSTFCKEVVRNANEEEYSIGSSSEESA	αs2-casein	31	A	K
EHVSSSEESIISQETYKQEKNMAINPSKENLCSTFCKEVVRNANEEEYSI	αs2-casein	50	I	E
PSKENLCSTFCKEVVRNANEEEYSIGSSSEESAEVATEEVKI	αs2-casein	42	I	P
EEKNRLNFLKKISQRYQKFALPQYLKTVYQHQKAMK	αs2-casein	36	K	E
SKENLCSTFCKEVVRNANEEEYSIGSSSEESAEVATE	αs2-casein	37	E	S
EVFTKKTKLTEEEKNRLNFLKKISQRYQKFALPQYL	αs2-casein	36	L	E
TVDMESTEVFTKKTKLTEEEKNRLN	αs2-casein	25	N	T
NPWDQVKRNAVPITPTLNR	αs2-casein	19	R	N
LYQGPIVLNPWDQVKRNAVPITPTLNREQLSTSEENSKKTVDMESTEVFTK	αs2-casein	51	K	L
EKNMAINPSKENLCSTFCKEVVRNANEEEYSIGSSSEE	αs2-casein	38	E	E
VATEEVKITVDDKHYQKALNEINQFYQKFPQYLQYLYQ	αs2-casein	38	Q	V
EVFTKKTKLTE	αs2-casein	11	E	E
SSSEESAEVATEEVKITVDDKHYQKALNEINQ	αs2-casein	32	Q	S
GPIVLNPWDQVKRNAVPITPTLNREQLSTSEENSKKTVDMESTEVFTKKTKLTEEEKNR	αs2-casein	59	R	G
ANEEEYSIGSSSEESAEVATEEVKITVDDKHYQKALNEINQFYQKFPQYLQYLYQGPIVL	αs2-casein	60	L	A
HYQKALNEINQFYQKFPQYLQYLYQGPIVLNPWDQVKRNAVPIT	αs2-casein	44	T	H
LNEINQFYQKFPQYLQYLYQGPIVLNPWDQVKRNAVP	αs2-casein	37	P	L
INPSKENLCSTFCKEVVRN	αs2-casein	19	N	I
FPQYLQYLYQGPIVLNPWDQVKRNAVPITPTLNREQLSTSEE	αs2-casein	42	E	F
ESAEVATEEVKITVDDKHYQKALNEINQF	αs2-casein	29	F	E
EEEKNRLNFLKK	αs2-casein	12	K	E
VLNPWDQVKRNAVPITPTLNREQLSTSEE	αs2-casein	29	E	V
LNEINQFYQKFPQYLQYLYQGPIVLNPWDQVKRNAVPITPTLNRE	αs2-casein	45	E	L
EVATEEVKITVDDKHYQKALNEI	αs2-casein	23	I	E
TEEEKNRLNFLKKISQRYQKFALPQYLKTVY	αs2-casein	31	Y	T
KKTVDMESTEVFTKKTKLTEEEKNRLNFLKKISQRYQKFALPQYLKTVYQHQK	αs2-casein	53	K	K
SAEVATEEVKITVDDKHYQKALNEINQFYQK	αs2-casein	31	K	S
SQETYKQEKNMAINPSKENLCSTFCKEVVR	αs2-casein	30	R	S
INQFYQKFPQYLQYLYQGPIVLN	αs2-casein	23	N	I
KQEKNMAINPSKENLCSTFCKEVVRNANEEEYSIGSSSEESAEVATEEVKIT	αs2-casein	52	T	K
NQFYQKFPQYLQYLYQGPIVLNP	αs2-casein	23	P	N
KEVVRNANEEEYSIGSSSEESAEVAT	αs2-casein	26	T	K
EYSIGSSSEESAEVATEEVKITVDDKHYQKALNEINQFYQKFPQYLQYL	αs2-casein	49	L	E
TPTLNREQLSTSEENSKKTVDMES	αs2-casein	24	S	T
STSEENSKKTVDMESTEVFTKKTKLTEEEKNRLNFLKKIS	αs2-casein	40	S	S
NPSKENLCSTFCKEVVRNANEEEYSIGSSSEESAEVATEEVKITVDDKHYQKALNEINQF	αs2-casein	60	F	N
KLTEEEKNRLNFL	αs2-casein	13	L	K
PTLNREQLSTSEENSKKTVDMESTEVFTKKTKLTEEEKNRLNFLKKISQRYQ	αs2-casein	52	Q	P
TEVFTKKTKLTEEEKNRLNFLKKISQRYQKFALPQYLKTVYQHQKAMKPWIQPKTKVIP	αs2-casein	59	P	T
AINPSKENLCSTFCK	αs2-casein	15	K	A
TKLTEEEKNRLNFLKKISQRYQKFALPQYLKTVYQHQKAMKPW	αs2-casein	43	W	T
KITVDDKHYQKALNEINQFYQKFPQYLQYLYQGPIVLNPWDQVKRNAV	αs2-casein	48	V	K
DKHYQKALNE	αs2-casein	10	E	D
PITPTLNREQLSTSEENSKKTVDMESTEV	αs2-casein	29	V	P
TLNREQLSTSEENSKKTVDMEST	αs2-casein	23	T	T
LQYLYQGPIVLNPWDQVKRNAVPITP	αs2-casein	26	P	L
VKRNAVPITPTLNREQLSTSEENSKKTVD	αs2-casein	29	D	V
LPQYLKTVYQHQKAMKPWIQPKTKVIP	αs2-casein	27	P	L
TFCKEVVRNANEEEYSIGSSSEESAEVATEEVKITVDD	αs2-casein	38	D	T
SSSEESIISQETYKQEKNMAINPSKENL	αs2-casein	28	L	S
NRLNFLKKISQRYQKFALPQYLKTVYQHQKAMKPW	αs2-casein	35	W	N
MAINPSKENLCSTFCKEVVRNANEEEYSIGSSSEESAEVATEEVKITV	αs2-casein	48	V	M
PSKENLCSTFCKEVVRNANEE	αs2-casein	21	E	P
STFCKEVVRNANEEEYSIGSSSEESAEVA	αs2-casein	29	A	S
FTKKTKLTEEEKNRLNFLKKISQRYQKFALPQYLKTVYQHQKAMKPWIQP	αs2-casein	50	P	F
DDKHYQKALNEINQFYQKF	αs2-casein	19	F	D
VFTKKTKLTEEEKNRLNFLKKISQRYQKFALPQYLKTVYQHQKAMKPW	αs2-casein	48	W	V
KKTVDMESTEVFT	αs2-casein	13	T	K
DMESTEVFTKKTKLTEEEKNRLNFLKKISQRYQKFALPQYLKTVY	αs2-casein	45	Y	D
ENSKKTVDMESTEVFTKKTKLTEEEKNRLNFLKKISQRYQKF	αs2-casein	42	F	E
VSSSEESIISQETYKQEKNMAINPSKEN	αs2-casein	28	N	V
KKTKLTEEEKNRLNFLKKISQRYQKFALPQYLKTVYQHQKAMKPWIQPKTKVIPYV	αs2-casein	56	V	K
CKEVVRNANEEEYSIGSSSEESAEVATEEV	αs2-casein	30	V	C
SSSEESIISQETYKQEKNMAINPSKEN	αs2-casein	27	N	S
GPIVLNPWDQVKRNAVPITPTLNREQLSTSEENSKKTVDM	αs2-casein	40	M	G
QLSTSEENSKKTVDMESTEVFTKKTKLTEEEKNRLNFLK	αs2-casein	39	K	Q
LTEEEKNRLNFLKKISQRYQKFALPQYLKTVYQHQKAMK	αs2-casein	39	K	L
TMEHVSSSEESIISQE	αs2-casein	16	E	T
PSKENLCSTFCKEVVRNANEEEYSIGSSSEESAEVATE	αs2-casein	38	E	P
NAVPITPTLNREQLSTSEENSKKTVDMESTEVFTKKTKLTEE	αs2-casein	42	E	N
EHVSSSEESIISQETYKQEKNMAINPSKENLCSTFCKEVVRNANEEEYSIGSSS	αs2-casein	54	S	E
LNFLKKISQRYQKFALPQYLK	αs2-casein	21	K	L
ETYKQEKNMAINPSKENLCSTFCKEVVRNANEEE	αs2-casein	34	E	E
MEHVSSSEESIISQETYKQEKNMAINPSKENLCSTFCK	αs2-casein	38	K	M
KNTMEHVSSSEESIISQETYKQEKNMAINPSKENLC	αs2-casein	36	C	K
YQKFALPQYLKTVYQ	αs2-casein	15	Q	Y
NAVPITPTLNREQLSTS	αs2-casein	17	S	N
TMEHVSSSEESIISQETYKQEKNMA	αs2-casein	25	A	T
SSEESAEVATEEVKITVDDKHYQKALNEINQFYQKFPQYLQYLYQGPIVL	αs2-casein	50	L	S
KTVYQHQKAMKPWIQPKTKVIPYVR	αs2-casein	25	R	K
ESIISQETYKQEKNMAINPSKENLCSTFCKEVVRNANEEEYSIGSSSEESAE	αs2-casein	52	E	E
VLNPWDQVKRNAVPITPTLNRE	αs2-casein	22	E	V
KTKLTEEEKNRLNFLKKISQRYQKFALPQYLKTVYQHQKAMKPWIQPKTKVIPY	αs2-casein	54	Y	K
TMEHVSSSEESIISQETYKQEK	αs2-casein	22	K	T
EVATEEVKITVDDKHYQKALNEIN	αs2-casein	24	N	E
NQFYQKFPQYLQYLYQ	αs2-casein	16	Q	N
LNFLKKISQRYQKFALPQYLKTVYQHQ	αs2-casein	27	Q	L
DQVKRNAVPITPTLNREQLSTSEENSKK	αs2-casein	28	K	D
EESIISQETYKQEKNMAINPSKENLCSTFCKEVVRNANEEEYSIGSSSEE	αs2-casein	50	E	E
KQEKNMAINPSKENLCSTFCKEVVR	αs2-casein	25	R	K
AMKPWIQPKTKVIPYV	αs2-casein	16	V	A
ITPTLNREQLSTSEENSKKTVDMEST	αs2-casein	26	T	I
KKTVDMESTEVFTKKTKLTEEEKNRLNFLKKISQRYQKFALPQY	αs2-casein	44	Y	K
LNPWDQVKRNAVPITPTLNREQLSTS	αs2-casein	26	S	L
TKLTEEEKNRLNFLKKISQRYQKFALPQYLKTVYQHQKAMKPWIQPKTKVIPYVR	αs2-casein	55	R	T
EENSKKTVDMESTEVFTKKTKLTEEEKN	αs2-casein	28	N	E
EKNRLNFLKKISQRYQKFALPQYLKTVYQHQKAMKPWIQPKTKV	αs2-casein	44	V	E
TKKTKLTEEEKNRLNFLKKISQRYQKFALPQY	αs2-casein	32	Y	T
TYKQEKNMAINPSKENLCSTFCKE	αs2-casein	24	E	T
EEVKITVDDKHYQKALNEINQFYQKFPQYLQYLY	αs2-casein	34	Y	E
KQEKNMAINPSKENLCSTFCKEVVRNANEEEYSIGSSSEESAEVATEEVKITVDDKHYQK	αs2-casein	60	K	K
EHVSSSEESIISQETYKQEKNMAIN	αs2-casein	25	N	E
KISQRYQKFALPQYLKTVYQHQKAMKPWIQPKTKVIPYVRYL	αs2-casein	42	L	K
QVKRNAVPITPTLNREQLSTSEENSKK	αs2-casein	27	K	Q
EQLSTSEENSKKTVDMESTEVFTKKTKLTEEE	αs2-casein	32	E	E
TPTLNREQLSTSEENSKKTVDME	αs2-casein	23	E	T
KTVYQHQKAM	αs2-casein	10	M	K
KTKLTEEEKNRLNFLKKISQRYQKFAL	αs2-casein	27	L	K
NRLNFLKKISQRYQKFALPQYLKTVYQHQKAMKPWIQPKTKVIP	αs2-casein	44	P	N
TEEVKITVDDKHYQKALNE	αs2-casein	19	E	T
TVDDKHYQKALNEIN	αs2-casein	15	N	T
VRNANEEEYSIGSSSEESAEVATEEVKITVDDK	αs2-casein	33	K	V
KHYQKALNEINQFYQKFPQYLQYLYQGPIVLNPW	αs2-casein	34	W	K
ATEEVKITVDDKHYQKALN	αs2-casein	19	N	A
SSEESAEVATEEVKITVDDKHYQKALNEI	αs2-casein	29	I	S
QGPIVLNPWDQVKRNAVPITPTLNREQLSTSE	αs2-casein	32	E	Q
STSEENSKKTVDMESTEVFTKKTKLTE	αs2-casein	27	E	S
ALNEINQFYQKFPQYLQYLYQGPIVLNPWDQVKRNAVPITPTLN	αs2-casein	44	N	A
VLNPWDQVKRNAV	αs2-casein	13	V	V
ATEEVKITVDDKHYQKALNE	αs2-casein	20	E	A
KNMAINPSKENLCSTFCKEVVRNAN	αs2-casein	25	N	K
KALNEINQFYQKFPQYLQYLYQGPIVLNPWDQVKRNAVPITPTLNRE	αs2-casein	47	E	K
SSEESAEVATEEVKI	αs2-casein	15	I	S
ESTEVFTKKTKLTEEEKNRLNFLKKIS	αs2-casein	27	S	E
KKTVDMESTEVFTKKTKLTEEEKNRLNFLKKISQRYQKFALPQYL	αs2-casein	45	L	K
TYKQEKNMAINPSKENLCS	αs2-casein	19	S	T
LKKISQRYQKFALPQYLKTVYQHQKAMKPWIQPKTKV	αs2-casein	37	V	L
ATEEVKITVDDKHYQKALNEINQFY	αs2-casein	25	Y	A
VKRNAVPITPTLNREQLSTSEENSK	αs2-casein	25	K	V
GPIVLNPWDQVKRNAVPITPTLNREQLSTSEENSKKTVDMEST	αs2-casein	43	T	G
HVSSSEESIISQETYKQEKNMAIN	αs2-casein	24	N	H
TPTLNREQLSTSEENSKKTVDMESTEVFTKKTKLTEEEKNRLNF	αs2-casein	44	F	T
EEKNRLNFLKKISQRYQKFALPQYLKTVYQHQKAMKPWIQPKTKVIPY	αs2-casein	48	Y	E
RNANEEEYSIGSSSEESAEVATEEVKITVDDKHYQKAL	αs2-casein	38	L	R
FPQYLQYLYQGPIVLN	αs2-casein	16	N	F
VATEEVKITVDDKHYQKALNE	αs2-casein	21	E	V
HVSSSEESIISQETYKQEKNMAINPSKENLCSTFCKEVVRNA	αs2-casein	42	A	H
EESIISQETYKQEKNMAINPSKENLCSTFC	αs2-casein	30	C	E
LQYLYQGPIVLNPWDQVKRNAVPITPTLNREQLSTSEENS	αs2-casein	40	S	L
FLKKISQRYQKFALPQYLKTVYQHQKAMKPWIQPKTK	αs2-casein	37	K	F
TVYQHQKAMKPWIQPKTKVIPYV	αs2-casein	23	V	T
TPTLNREQLSTSEENSKKTVDMESTEVFTKKTKLTEEEKNR	αs2-casein	41	R	T
LNFLKKISQRYQKFALPQY	αs2-casein	19	Y	L
REQLSTSEENSKKTVDM	αs2-casein	17	M	R
IVLNPWDQVKRNAVPITPTLNREQLSTSEEN	αs2-casein	31	N	I
VRNANEEEYSIGSSSEESAEVATEEVKITVDDKHYQK	αs2-casein	37	K	V
FPQYLQYLYQGPIVLNPWDQVKRNAVPITPTLNREQLST	αs2-casein	39	T	F
TSEENSKKTVDMESTEVFTKKTKLTEEEKNRLNFLKKISQRYQKFA	αs2-casein	46	A	T
YQKALNEINQFYQKFP	αs2-casein	16	P	Y
EKNRLNFLKKISQRYQKFALPQYLKTVYQHQKAMKPWIQPKTKVIPY	αs2-casein	47	Y	E
SSEESIISQETYKQEKNMAINPSKENLCSTFCKEVVRNANEEEYSIGSSSEESA	αs2-casein	54	A	S
NAVPITPTLNREQLSTSEENSKKTVDMEST	αs2-casein	30	T	N
LPQYLKTVYQHQKAMKP	αs2-casein	17	P	L
EEEYSIGSSSEESAEVATEEVKITVDDKHYQKALNEINQFYQKFPQYLQYLYQGPIVLNP	αs2-casein	60	P	E
ITVDDKHYQKALNEINQFYQKFPQYLQYLYQG	αs2-casein	32	G	I
INPSKENLCSTFCKEVVRNANEEEYS	αs2-casein	26	S	I
INPSKENLCSTFCKEVVRNAN	αs2-casein	21	N	I
PQYLQYLYQGPIVLNPWDQ	αs2-casein	19	Q	P
MESTEVFTKKTKLTEEEKNR	αs2-casein	20	R	M
SKKTVDMESTEVFTKKTKLTEEEKNRLNFLKKISQRYQKFAL	αs2-casein	42	L	S
SIISQETYKQEKNMAINPSKENLCS	αs2-casein	25	S	S
KISQRYQKFALPQYLKTVY	αs2-casein	19	Y	K
SEESAEVATEEVKITVDDKHYQKALNEINQFYQKFPQYLQYLYQGPIVLNPWDQVKRNA	αs2-casein	59	A	S
MAINPSKENLCSTFCKEVVRNANEEEYSIGSSSEES	αs2-casein	36	S	M
NSKKTVDMESTEVFTKKTKLTEEEKNRLN	αs2-casein	29	N	N
KHYQKALNEINQFYQK	αs2-casein	16	K	K
LNFLKKISQRYQKFALPQYLKTVYQHQKAMKP	αs2-casein	32	P	L
SEENSKKTVDMESTEVFTKKTKLTEEEKNRLN	αs2-casein	32	N	S
MEHVSSSEESIISQETYKQEKNMAINPSKE	αs2-casein	30	E	M
KNMAINPSKENLCSTFCKEVVRNANEEEYS	αs2-casein	30	S	K
TPTLNREQLSTSEENSKKTV	αs2-casein	20	V	T
EENSKKTVDMESTEVFTKKTKLTEEEKNRLN	αs2-casein	31	N	E
ESTEVFTKKTKLTEEEKNRLNFLKKISQRYQKFALPQY	αs2-casein	38	Y	E
TFCKEVVRNANEEEYSIGSSSEESAEVATE	αs2-casein	30	E	T
QKAMKPWIQPKTKVIPYVR	αs2-casein	19	R	Q
DQVKRNAVPITPTLNREQLSTSEENSKKTVD	αs2-casein	31	D	D
GPIVLNPWD	αs2-casein	9	D	G
STEVFTKKTKLTEEEKNRLNFLKKISQRYQKFALPQYLKTV	αs2-casein	41	V	S
LNPWDQVKRNAVPITPTLN	αs2-casein	19	N	L
TKLTEEEKNRLNFLKKISQRYQKFALPQYLKTVYQHQKAMKPWIQPKT	αs2-casein	48	T	T
EEEKNRLNFLKKISQRY	αs2-casein	17	Y	E
TEVFTKKTKLTEEEKNRLNFLKKISQRYQKFALPQYLKTVYQHQKAMKPWIQPK	αs2-casein	54	K	T
YQKALNEINQFYQKFPQ	αs2-casein	17	Q	Y
NMAINPSKENLCSTFCKEVVRNANEEEYSIGSSSEESAEVATEEVKITVDDKHYQKALNE	αs2-casein	60	E	N
IVLNPWDQVKRNAVPITPTLNREQLSTSEENSKKT	αs2-casein	35	T	I
MAINPSKENLCSTFCKEVVRNANEEEYSIGSSSEESAEVATEEVKITVD	αs2-casein	49	D	M
FTKKTKLTEEEKNRLNFLKKISQRY	αs2-casein	25	Y	F
SQETYKQEKNMAINPSKENLCSTFCKEVVRNANEEEY	αs2-casein	37	Y	S
WDQVKRNAVPITPTLNREQLSTSEENSKKTVDMESTEVFT	αs2-casein	40	T	W
VVRNANEEEYSIGSSSEESAEVATEEVKITVDDKHYQKALNEINQFYQKFPQYLQYLYQG	αs2-casein	60	G	V
LKTVYQHQKAMKPWIQPKTKV	αs2-casein	21	V	L
EKNRLNFLKKISQRYQKFALPQYLKTVYQH	αs2-casein	30	H	E
KKTKLTEEEKNRLNFLKKISQRYQKFALPQYLKT	αs2-casein	34	T	K
EEKNRLNFLK	αs2-casein	10	K	E
TVDMESTEVFTKKTKLTEEEKNRLNFLKKISQRYQK	αs2-casein	36	K	T
FYQKFPQYLQYLYQGPIVLNPWDQVKRNAVPITPTLNREQL	αs2-casein	41	L	F
NFLKKISQRYQKFALPQYLKTVYQHQKAMKPWIQP	αs2-casein	35	P	N
NLCSTFCKEVVRNANEEEYSIGSSSEESAEVATEEVKITVDDKHYQKAL	αs2-casein	49	L	N
ITVDDKHYQKALNEINQFYQKFPQYLQYLYQGPIVLNPWDQ	αs2-casein	41	Q	I
LCSTFCKEVVRNANEEEYSIGSSSEESAEVATEEVKITVDDKHYQKALNEINQFYQKFPQ	αs2-casein	60	Q	L
NEEEYSIGSSSEESAEVATEE	αs2-casein	21	E	N
SSSEESIISQETYKQE	αs2-casein	16	E	S
SIGSSSEESAEVATEEVKITVDDKHYQKALNEINQFYQKFPQYLQ	αs2-casein	45	Q	S
KEVVRNANEEEYSIGSSSEESAEVATEEVK	αs2-casein	30	K	K
SEESIISQETYKQE	αs2-casein	14	E	S
NLCSTFCKEVVRNANEEEYSIGSSSEESAEVATEEVKITVDDKHYQKALNEINQF	αs2-casein	55	F	N
VLNPWDQVKRNAVPITPTLNREQL	αs2-casein	24	L	V
TYKQEKNMAINPSKENLCSTFCKEVVRNANEEEYSI	αs2-casein	36	I	T
TPTLNREQLSTSEENSKKTVDMESTEVFTKKTKLTEEEKNRLNFLKKISQRYQKFALPQ	αs2-casein	59	Q	T
PQYLKTVYQHQKAMKPWIQPKTKVIPY	αs2-casein	27	Y	P
NPSKENLCSTFCKEVVRNANEEEYSIGSSS	αs2-casein	30	S	N
VLNPWDQVKRNAVPITPTLNREQLSTSEENSKKTVDMESTEVFTKKTKLTEEEK	αs2-casein	54	K	V
TFCKEVVRNANEEEYSIGSSSEESAEVATEEVKIT	αs2-casein	35	T	T
QFYQKFPQYLQYLYQGPIVLNPWDQVKRNAVPITPTLNREQLSTSEENSKKTVDME	αs2-casein	56	E	Q
TVYQHQKAMKPWIQPKTKVIPYVRY	αs2-casein	25	Y	T
QYLKTVYQHQKAMKPWIQPKTKVIP	αs2-casein	25	P	Q
QVKRNAVPITPTLNREQLS	αs2-casein	19	S	Q
SSEESIISQETYKQEKNMAINP	αs2-casein	22	P	S
VVRNANEEEYSIGSSSEESAEVATEEVKITVDDKHYQKALNEI	αs2-casein	43	I	V
VATEEVKITVDDKHYQKALNEINQFYQKFPQYLQYLYQGPIVLNPWDQVKRNAVP	αs2-casein	55	P	V
IVLNPWDQVKRNAVPITPTLNREQLSTSEENSKKTV	αs2-casein	36	V	I
EHVSSSEESIISQETYKQEKNMAINPS	αs2-casein	27	S	E
LCSTFCKEVVRNANEEEYSIGSSSEESAEVATEEVKITVDDKHYQKALNEINQFYQKF	αs2-casein	58	F	L
VPITPTLNREQLSTSEENSKKTVDMESTEVFTKKTKLTEEEKNRLNFLKKISQ	αs2-casein	53	Q	V
QYLQYLYQGPIVLNPWDQVK	αs2-casein	20	K	Q
TPTLNREQLSTSEENSKKTVD	αs2-casein	21	D	T
TMEHVSSSEESII	αs2-casein	13	I	T
SKENLCSTFCKEVVRNA	αs2-casein	17	A	S
EEEYSIGSSSEESAEVATEEVKITVDDKHYQKALNEINQFYQK	αs2-casein	43	K	E
EKNRLNFLKKISQRYQKFALPQYLK	αs2-casein	25	K	E
RNAVPITPTLNREQLSTSEENSKKTVDMESTEV	αs2-casein	33	V	R
SSEESIISQETYKQEKNMAINPSKENLCSTFCKEVVRNANEEEY	αs2-casein	44	Y	S
SQETYKQEKNMAINPSKENLCSTFC	αs2-casein	25	C	S
STSEENSKKTVDMESTEVFTKKTKLTEEEKNR	αs2-casein	32	R	S
KQEKNMAINPSKENLCSTFCKEVVRNANEEEYS	αs2-casein	33	S	K
VVRNANEEEYSIGS	αs2-casein	14	S	V
KEVVRNANEEEYSIGSSSE	αs2-casein	19	E	K
TEEEKNRLNFLKKISQRY	αs2-casein	18	Y	T
QETYKQEKNMAINPSKE	αs2-casein	17	E	Q
EEEKNRLNFLKKISQRYQ	αs2-casein	18	Q	E
IISQETYKQEKNMAINPSKENL	αs2-casein	22	L	I
LTEEEKNRLNFLKKISQRYQKFALPQYLKTVYQHQKAMKP	αs2-casein	40	P	L
KFALPQYLKTVYQHQKAMKPWIQPKTKVIPYV	αs2-casein	32	V	K
KRNAVPITPTLNREQLSTSEENSKKTVDM	αs2-casein	29	M	K
EESIISQETYKQEKNMAINPSKENLCSTFCKEVVRNAN	αs2-casein	38	N	E
QLSTSEENSKKTVDMESTEVFTKKTKLTEEEKNRLNFLKKI	αs2-casein	41	I	Q
VPITPTLNREQLSTSEENS	αs2-casein	19	S	V
ENSKKTVD	αs2-casein	8	D	E
NAVPITPTLNREQ	αs2-casein	13	Q	N
VDDKHYQKALNEI	αs2-casein	13	I	V
KENLCSTFCKEVVR	αs2-casein	14	R	K
EVKITVDDKHYQKALNEINQFYQ	αs2-casein	23	Q	E
QKALNEINQFYQKFPQYLQY	αs2-casein	20	Y	Q
DMESTEVFTKKTKLTEEEKNRLNFL	αs2-casein	25	L	D
FCKEVVRNANEEEYSIGSSSEE	αs2-casein	22	E	F
SKENLCSTFCKEVVRN	αs2-casein	16	N	S
TVDMESTEVFTKKTKLTEEEKNRLNF	αs2-casein	26	F	T
NPWDQVKRNA	αs2-casein	10	A	N
YQKALNEINQFYQKFPQYLQYLYQGPIVLNPWDQVKR	αs2-casein	37	R	Y
NMAINPSKENLCSTFCKEVVRNANEEEYSIGSSSEESAEV	αs2-casein	40	V	N
TKKTKLTEEEKNRLNFLKKISQRYQ	αs2-casein	25	Q	T
VDMESTEVFTKKTKLTEEEK	αs2-casein	20	K	V
VPITPTLNREQLSTSEENSKKT	αs2-casein	22	T	V
LCSTFCKEVVRNANEEEYSIGSSSEESAEVATEEVKITVDDKHYQKALN	αs2-casein	49	N	L
MESTEVFTKKTKLTEEEKNRLNFLKKISQRYQKFALPQYLKTVYQHQKAMKPWIQPKT	αs2-casein	58	T	M
EYSIGSSSEESAEVATEEVKITVDDKHYQKALNE	αs2-casein	34	E	E
VFTKKTKLTEEEKNRLNFLKKISQRYQKFALPQYLKTVYQHQKA	αs2-casein	44	A	V
ANEEEYSIGSSSEESAEVATEEVKITVDD	αs2-casein	29	D	A
DDKHYQKALNEINQFYQKFPQYLQYLYQGPIVLNPWDQ	αs2-casein	38	Q	D
KRNAVPITPTLNREQLSTSEENSKKTVDMESTEVFTKKTKLTE	αs2-casein	43	E	K
ESTEVFTKKTKLTEEEKNRLNFLKKISQRYQKFALPQYLKTVYQHQKAM	αs2-casein	49	M	E
KENLCSTFCKEVV	αs2-casein	13	V	K
KNTMEHVSSSEESIISQETYKQEKNMAINPSKENLCSTF	αs2-casein	39	F	K
SPAQILQWQVLSNTVPA	κ-casein	17	A	S
VLSRYPSYGLN	κ-casein	11	N	V
AIPPKKNQDKTEIPTINT	κ-casein	18	T	A
VLSRYPSYGLNYYQQKPVALINNQFLPYPY	κ-casein	30	Y	V
IPTINTIASGEPTSTPTTEAVESTVAT	κ-casein	27	T	I
SPAQILQWQV	κ-casein	10	V	S
WQVLSNTVPAKSCQAQPTTMAR	κ-casein	22	R	W
LQWQVLSNTVPAKSCQAQPTTMAR	κ-casein	24	R	L
KNQDKTEIPTINT	κ-casein	13	T	K
SPAQILQWQVL	κ-casein	11	L	S
ASGEPTSTPTTEAVESTVAT	κ-casein	20	T	A
RSPAQILQWQVLSNTVPA	κ-casein	18	A	R
NQDKTEIPTINT	κ-casein	12	T	N
NNQFLPYPYYAKPA	κ-casein	14	A	N
MARHPHPHLSFMAIPPKK	κ-casein	18	K	M
INNQFLPYPYYAKPA	κ-casein	15	A	I
PAAVRSPAQILQWQVLSNTV	κ-casein	20	V	P
EQNQEQPIRCEKDERF	κ-casein	16	F	E
ASGEPTSTPTTEAVESTV	κ-casein	18	V	A
YIPIQYVLSRYPSYGLNYYQQKPVALI	κ-casein	27	I	Y
SYGLNYYQQKPVALINNQFLPYPYYAKP	κ-casein	28	P	S
KKNQDKTEIPTINTIA	κ-casein	16	A	K
ESPPEINTVQVT	κ-casein	12	T	E
SRYPSYGLNYYQQKPVA	κ-casein	17	A	S
VLSNTVPAKSCQAQPTTMARHPHPHLSFM	κ-casein	29	M	V
RYPSYGLNYYQQKPVALINN	κ-casein	20	N	R
AKYIPIQYVLSRYPSYGLNYYQ	κ-casein	22	Q	A
PKKNQDKTEIPTIN	κ-casein	14	N	P
WQVLSNTVPAKSCQAQPTTM	κ-casein	20	M	W
CQAQPTTMARHPHPHLSFMAIPPKK	κ-casein	25	K	C
YIPIQYVLSR	κ-casein	10	R	Y
LSFMAIPPKKNQDKT	κ-casein	15	T	L
LSFMAIPPKKNQDKTEIPTIN	κ-casein	21	N	L
RYPSYGLNYYQQKPVALI	κ-casein	18	I	R
TSTPTTEAVESTVATLEDSPEVIESP	κ-casein	26	P	T
ATLEDSPEVIESP	κ-casein	13	P	A
EVIESPPEINTVQVTSTA	κ-casein	18	A	E
PHLSFMAIPPKKNQDKTEIPTINTI	κ-casein	25	I	P
HPHPHLSFMAIPPKKNQDKTEIPTINT	κ-casein	27	T	H
QEQPIRCEKDERFFSD	κ-casein	16	D	Q
QILQWQVLSNTVPAKSCQAQPTT	κ-casein	23	T	Q
SRYPSYGLNYYQQKPVALINNQFLPY	κ-casein	26	Y	S
IQYVLSRYPSYGLNYYQQKPVALI	κ-casein	24	I	I
TEAVESTVATLEDSPEVIESPPEINTVQVT	κ-casein	30	T	T
SPAQILQWQVLSNTV	κ-casein	15	V	S
TMARHPHPHLSFMAIPPKKNQD	κ-casein	22	D	T
QNQEQPIRCEKDERFFSDKIAKYIPIQYV	κ-casein	29	V	Q
TVPAKSCQAQPTTMARHP	κ-casein	18	P	T
NQDKTEIPTINTIA	κ-casein	14	A	N
MAIPPKKNQDKTEIPTINTIASGE	κ-casein	24	E	M
YPYYAKPAAVRSPAQILQWQVLSNTV	κ-casein	26	V	Y
PTTEAVESTVATLEDSPEVIESPPEINTV	κ-casein	29	V	P
TVATLED	κ-casein	7	D	T
FFSDKIA	κ-casein	7	A	F
FFSDKIAK	κ-casein	8	K	F
KPAAVRSPAQILQWQVLSNTVPAKSC	κ-casein	26	C	K
LSRYPSYGLNYYQQKPVALINNQFLPYPYYAKPAAVRSPAQ	κ-casein	41	Q	L
FFSDKIAKYIPIQYVLSRYPSYGLNYYQQKPVALINNQFLPYPY	κ-casein	44	Y	F
HPHLSFM	κ-casein	7	M	H
TVQVTSTAV	κ-casein	9	V	T
LEDSPEVIESPPEINTVQVTSTAV	κ-casein	24	V	L
YAKPAAV	κ-casein	7	V	Y
SPPEINTVQ	κ-casein	9	Q	S
LNYYQQKPVALINNQFLPYPYYAK	κ-casein	24	K	L
INTIASGEPTSTPTTEAVESTVATLED	κ-casein	27	D	I
STVATLEDSPEV	κ-casein	12	V	S
PTINTIASGEPTS	κ-casein	13	S	P
ARHPHPHLS	κ-casein	9	S	A
LSRYPSYGLNYYQQKPVALINNQFLPYPYYAKPAAVRSPAQILQWQVLS	κ-casein	49	S	L
DKTEIPTINTIASGEPTSTPTTEAVESTVATLEDSPEV	κ-casein	38	V	D
TEIPTINTIASGEPTSTPTTEAVESTVATLEDSPEVIESPPEINTVQ	κ-casein	47	Q	T
ASGEPTSTPTTEAVESTVATLEDSPEVIES	κ-casein	30	S	A
IPPKKNQDKTEIPTINTIASGEPTS	κ-casein	25	S	I
AIPPKKNQDKTEIPTINTIASGEPTSTPTTEAVESTV	κ-casein	37	V	A
YIPIQYVLSRYPSYGLNYYQQKPV	κ-casein	24	V	Y
DKIAKYIPIQYVLSRYPSYGLNYYQQKPVALINNQ	κ-casein	35	Q	D
SPAQILQWQ	κ-casein	9	Q	S
STPTTEAVESTVATLEDSPEVIESP	κ-casein	25	P	S
AKPAAVRSPAQILQWQ	κ-casein	16	Q	A
PYYAKPAAVRSPAQILQWQVLSNTVPAKSCQAQPTTMARHPH	κ-casein	42	H	P
EAVESTVATLEDSPEVIESPPEI	κ-casein	23	I	E
LQWQVLSNTVPAKSCQAQPTTMARHP	κ-casein	26	P	L
INNQFLPYPY	κ-casein	10	Y	I
SGEPTSTPTTEAVESTVATLEDSPEVIESPPEINT	κ-casein	35	T	S
LQWQVLS	κ-casein	7	S	L
KNQDKTEIPTINTIASGEPTSTPTTEAVESTVATLEDSPEVIESPPEINTVQVTSTA	κ-casein	57	A	K
MAIPPKKNQDKTEIPTINTIASGEPTSTPTTEAVESTVAT	κ-casein	40	T	M
IASGEPTSTPTTEAVES	κ-casein	17	S	I
KNQDKTEIPTINTIASGEPTSTPTTEAVESTVATLEDSPEVIESPPEINTVQVT	κ-casein	54	T	K
KKNQDKTEIPTINTIASGEP	κ-casein	20	P	K
RYPSYGLNYYQQKPVA	κ-casein	16	A	R
NQDKTEIPTINTI	κ-casein	13	I	N
VPAKSCQAQPTTMARHPHPH	κ-casein	20	H	V
PKKNQDKTEIPTINTIASGEPTS	κ-casein	23	S	P
LNYYQQKPVALINNQFLPYP	κ-casein	20	P	L
EIPTINTIASGEPTSTPTTE	κ-casein	20	E	E
PTSTPTTEAVESTVATLEDSPEVIESPPEINTV	κ-casein	33	V	P
TVATLEDSPEVIESPPEINT	κ-casein	20	T	T
ERFFSDKIAKYIPIQY	κ-casein	16	Y	E
FSDKIAK	κ-casein	7	K	F
EIPTINTIASGEPTSTPTTEAVESTVATLEDSPEVIESPPEINTVQVTSTA	κ-casein	51	A	E
PKKNQDKTEIPTINTIASGEPTSTPT	κ-casein	26	T	P
TTMARHPHPHLSFMAIPPKKNQDKTEIPTINTIASGEPTS	κ-casein	40	S	T
HPHPHLSFMAIPPKKNQDKTEIPT	κ-casein	24	T	H
YIPIQYVLSRYPSYGLNYYQQKP	κ-casein	23	P	Y
ATLEDSPEVIESPPEINTVQ	κ-casein	20	Q	A
WQVLSNTVPAKSCQAQPTTMARHPHPHLSFMAIPPKKNQD	κ-casein	40	D	W
PTSTPTTEAVESTVATLEDSPEVIESP	κ-casein	27	P	P
ATLEDSPEVIESPP	κ-casein	14	P	A
AIPPKKNQDKTEIPTINTIASGEPTSTPTTEAVESTVA	κ-casein	38	A	A
NTIASGEPTSTPTTEAVESTVATL	κ-casein	24	L	N
INTIASGEPTSTPTTEAVESTVA	κ-casein	23	A	I
KTEIPTINTIASG	κ-casein	13	G	K
ALINNQFLPYPYYAKPAAVRSPAQILQWQVLSNT	κ-casein	34	T	A
IQYVLSRYPSYGLNYYQQKPVALINNQFLPYPYY	κ-casein	34	Y	I
SPAQILQWQVLSNTVPAKSCQAQPTTMARHPHPHLSFMAIPPKKNQDKTEIPTINTIASG	κ-casein	60	G	S
QVLSNTVPAKSCQAQPTTMARHPHPHLSFMAIPPKKNQDKTEIPTINTIAS	κ-casein	51	S	Q
VRSPAQILQWQVLSNTVPAKSCQAQPTTMARHPHPHLSFMAIPPKKNQDKTEIPTINTIA	κ-casein	60	A	V
ILQWQVLSNTVPAKSC	κ-casein	16	C	I
TVPAKSCQAQPTTM	κ-casein	14	M	T
PPKKNQDKTEIPTINTIASGEPTSTPTTEAVESTV	κ-casein	35	V	P
SCQAQPTTMARHPHPHLSFMAIPPKKNQDKTEIPTINTIASGE	κ-casein	43	E	S
FLPYPYYAKPAAVRSPAQILQWQVLSNTVPAKSCQAQPTTMARHPHPHLSFMAIPP	κ-casein	56	P	F
RHPHPHLSFMAIPPKKNQDKTEIPTINTIASGEPTSTPTTEAV	κ-casein	43	V	R
TMARHPHPHLSFMAI	κ-casein	15	I	T
DSPEVIESPPEINTVQV	κ-casein	17	V	D
EVIESPPEINTVQVTSTAV	κ-casein	19	V	E
STPTTEAVESTVATL	κ-casein	15	L	S
YYQQKPVALINNQFLPYPYYAKPAAVRSPAQILQWQVLSN	κ-casein	40	N	Y
INTIASGEPTSTPTTEAVESTV	κ-casein	22	V	I
PHPHLSFMAIPPKKNQDKTE	κ-casein	20	E	P
YGLNYYQQKPVALINNQFLPYPYYAKPAAVRSPAQILQ	κ-casein	38	Q	Y
TTEAVESTVATLEDSPEVIESPPEINTVQV	κ-casein	30	V	T
TVATLEDSPEVIESPPEI	κ-casein	18	I	T
AAVRSPAQILQWQVLSNTVPAKSCQAQPTTMAR	κ-casein	33	R	A
SCQAQPTTMARHPHPHLSFMAIPPKKNQDKTEIPTINTIASGEP	κ-casein	44	P	S
SFMAIPPKKNQDKTEIPTINTIASGEPTSTPTTEAVESTVATLEDSPE	κ-casein	48	E	S
FFSDKIAKYIPIQYVLSRYPSYGLNYYQQKPVALINNQFLPYPYYAKPAAVRSPAQIL	κ-casein	58	L	F
KSCQAQPTTMARHPHPHLSFMAIPPKKNQDKTE	κ-casein	33	E	K
FFSDKIAKYIPIQYVLSRYPSYGLNYYQQ	κ-casein	29	Q	F
AQILQWQVLSNTVPAKSCQAQPTTMARHPHPH	κ-casein	32	H	A
TTMARHPHPHLSFMAIP	κ-casein	17	P	T
EQPIRCEKDERFFSD	κ-casein	15	D	E
EQNQEQPIRCEKDERFFSDKIAKYIPIQYVLSRYPSYGLNYYQQKPVALINN	κ-casein	52	N	E
FMAIPPKKNQDKTEIPTINTIA	κ-casein	22	A	F
KYIPIQYVLSRYPSYGLNYYQQKPVALINNQFLPYPYYAK	κ-casein	40	K	K
QFLPYPYYAKPAAVRSPAQILQWQVLSNTV	κ-casein	30	V	Q
CQAQPTTMARHPHPHLSFMAIPPKKNQDKTEIPTINTIASGEPTSTPTTEAVESTV	κ-casein	56	V	C
LINNQFLPYPYYAKPAAVRSPAQILQWQV	κ-casein	29	V	L
KNQDKTEIPTINTIASGEPTSTPTTEAVESTV	κ-casein	32	V	K
IPIQYVLSRYPSYGLNYYQQKPVALIN	κ-casein	27	N	I
TPTTEAVESTVATLEDSPEVIESPPEINT	κ-casein	29	T	T
PYYAKPAAVRSPAQILQWQVLSNTVPAKSCQAQPTTMARHPHPHLSFMAI	κ-casein	50	I	P
VPAKSCQAQPTTMARHPHPHLSF	κ-casein	23	F	V
TLEDSPEVIES	κ-casein	11	S	T
SNTVPAKSCQAQPTTMARHPHPHLSFMAIP	κ-casein	30	P	S
QVLSNTVPAKSCQAQPTTMARHPHPHLSFMAIPPKKNQDKTEIPTINTIA	κ-casein	50	A	Q
KYIPIQYVLSRYPSYGLNYYQQKPVALINNQFL	κ-casein	33	L	K
NTVPAKSCQAQPTTMARHPH	κ-casein	20	H	N
RYPSYGLNYYQQKPVALINNQFLPYPYYAKPAAVRSPAQILQWQ	κ-casein	44	Q	R
FSDKIAKYIPIQYVLSRYPSYGLNYYQQK	κ-casein	29	K	F
VPAKSCQAQPTTMARHPHPHL	κ-casein	21	L	V
RCEKDERFFSDKIAKYIPIQYVLSRYPSYG	κ-casein	30	G	R
VLSNTVPAKSCQAQPTTMARHPHPHLSFMAIPPKK	κ-casein	35	K	V
QQKPVALINNQFLPYPYYAKPAAVRSPAQILQWQVLSNTVPAKSCQA	κ-casein	47	A	Q
LSNTVPAKSCQAQPTTMARHPHPHLSFMAIPPKK	κ-casein	34	K	L
KSCQAQPTTMARHPHPHLSFMAIPPKKNQDKTEIPTINTIAS	κ-casein	42	S	K
QYVLSRYPSYGLNYYQQKPVALINNQFLPYPYYAKPAAVRSPAQILQWQVLSNTVPAKSC	κ-casein	60	C	Q
QYVLSRYPSYGLNYYQQKPVALINNQFLPYPYY	κ-casein	33	Y	Q
FMAIPPKKNQDKTEIPTINTIASGEPTSTPTTE	κ-casein	33	E	F
AQILQWQVLSNTVPA	κ-casein	15	A	A
MARHPHPHLSFMAIPPKKNQDKTEIP	κ-casein	26	P	M
EAVESTVATLEDSPEVIESPPE	κ-casein	22	E	E
QYVLSRYPSYGLNYYQQKPVAL	κ-casein	22	L	Q
KSCQAQPTTMARHPHPHLSFMAIPPKKNQDKTEIPT	κ-casein	36	T	K
KSCQAQPTTMARHPHPHLSFMAIPPKKNQDKTEIPTINTIASGEPTSTPTTEAVESTV	κ-casein	58	V	K
SFMAIPPKKNQDKTEIPTIN	κ-casein	20	N	S
PAKSCQAQPTTMARHPHPHLSFMAIPPKKNQDKTEIPT	κ-casein	38	T	P
LEDSPEVIESP	κ-casein	11	P	L
EQPIRCEKDERFFSDKIAKYIPIQYVLSRYPSYGLNYYQQKP	κ-casein	42	P	E
SCQAQPTTMARHPHPHLSFMAIPPKKNQDKTEIPT	κ-casein	35	T	S
KTEIPTINTIASGEPTSTPTTEAVESTVATLEDSPEVIESPPE	κ-casein	43	E	K
YVLSRYPSYGLNYYQQKPVALINNQFLP	κ-casein	28	P	Y
AAVRSPAQILQ	κ-casein	11	Q	A
CEKDERFFSDKIAKYIPIQYVLSRYPSYGLNYYQQKPVALINNQF	κ-casein	45	F	C
PYYAKPAAVRSPAQILQWQVLSNTVP	κ-casein	26	P	P
QDKTEIPTINTIASGEPTSTPTTEAV	κ-casein	26	V	Q
STPTTEAVESTVATLEDSP	κ-casein	19	P	S
SYGLNYYQQKPVALINNQFLPYPYYAKPA	κ-casein	29	A	S
WQVLSNTVPAKSCQAQPTTMARHPHPHLSFMAIPPKKNQDKTEIPTI	κ-casein	47	I	W
NQEQPIRCEKDERFFSDKIAKYIPIQYVLSRYPSYGLNYYQQKPVALIN	κ-casein	49	N	N
LPYPYYAKPAAVRSPAQILQWQVLSNTVP	κ-casein	29	P	L
TEAVESTVATLEDSPEVIESPPEI	κ-casein	24	I	T
TVPAKSCQAQPTTMARHPHPHLSFMAIPPK	κ-casein	30	K	T
RYPSYGLNYYQQK	κ-casein	13	K	R
LPYPYYAKPAAVRSPAQILQWQVLSNTVPAKSCQ	κ-casein	34	Q	L
IAKYIPIQYVLSRYPSYGLNYYQQKPVAL	κ-casein	29	L	I
DKIAKYIPIQYVLSRYPSYGLNYYQQKPVALINNQFLPYPYYAKPAAVRSPAQILQWQ	κ-casein	58	Q	D
ILQWQVLSNTVPAKSCQAQPTTMAR	κ-casein	25	R	I
TSTPTTEAVESTVATLEDSPEVIESPPEINT	κ-casein	31	T	T
KPAAVRSPAQILQWQVLSNTVPAKSCQAQPTTMARH	κ-casein	36	H	K
SCQAQPTTMARHPHPHLSFMAIPPKKNQDKTEIPTI	κ-casein	36	I	S
AAVRSPAQILQWQVLSNTVPAKSCQAQPTTMARHPHPHLSFMAIPPKKNQDKTEI	κ-casein	55	I	A
MAIPPKKNQDKTEIPTINTIASGEPTSTPTTEAV	κ-casein	34	V	M
STPTTEAVESTVATLEDSPEVIESPPEINT	κ-casein	30	T	S
FMAIPPKKNQDKTEIPT	κ-casein	17	T	F
IPTINTIASGEPTSTPTTEAVESTVATLEDSPEVIESPPEINTVQ	κ-casein	45	Q	I
QWQVLSNTVPAKSCQAQPTTMA	κ-casein	22	A	Q
ERFFSDKIAKYIPIQYVLSRYPSYGLNYYQQKPV	κ-casein	34	V	E
YPYYAKPAAVRSPAQILQWQVLSNTVPAKSCQAQPTTMARHP	κ-casein	42	P	Y
WQVLSNTVPAKSCQAQPTTMARH	κ-casein	23	H	W
QDKTEIPTINTIASGEPTS	κ-casein	19	S	Q
YPYYAKPAAVRSPAQILQWQVLSNTVPAKSCQAQP	κ-casein	35	P	Y
RHPHPHLSFMAIPPKKNQDKTEIPTINTIASGEPTSTPTTEAVE	κ-casein	44	E	R
SPAQILQWQVLSNTVPAKSCQAQ	κ-casein	23	Q	S
QWQVLSNTVPAKSCQAQPTTMARHPHPHLSFM	κ-casein	32	M	Q
KPVALINNQFLPYPYYAKPAAVRSPAQILQWQVLSN	κ-casein	36	N	K
PAAVRSPAQILQWQVLSNTVPAKSCQAQPTTMARHPHPHLSFMAIPP	κ-casein	47	P	P
PIQYVLSRYPSYGLNYYQQKPVALINNQFLPYPYYA	κ-casein	36	A	P
FFSDKIAKYIPIQYVLSR	κ-casein	18	R	F
KIAKYIPIQYVLSRYPSYGL	κ-casein	20	L	K
MARHPHPHLSFMAIPPKKNQDKTEIPTINTIA	κ-casein	32	A	M
MAIPPKKNQDKTEIPTINTIASG	κ-casein	23	G	M
PAQILQWQVLSNTVPAKSCQAQPTT	κ-casein	25	T	P
CQAQPTTMARHPHPHLSFM	κ-casein	19	M	C
CQAQPTTMARHPHPHLSFMAIPPKKNQD	κ-casein	28	D	C
AVESTVATLEDSPEVIESPPEI	κ-casein	22	I	A
TIASGEPTSTPTTEAVE	κ-casein	17	E	T
GLNYYQQKPVALINNQFLPYPYYAKPAAVRSPAQILQWQVLSNTVPAK	κ-casein	48	K	G
ILQWQVLSNTVPAK	κ-casein	14	K	I
DKTEIPTINTIASGEPTSTPTTEAVESTVATLEDSPEVIESPPEINTVQVTSTAV	κ-casein	55	V	D
KTEIPTINTIASGE	κ-casein	14	E	K
TEAVESTVATLEDSPEVIES	κ-casein	20	S	T
NYYQQKPVALINNQFLPYPYYAKPAAVRSPAQILQWQVLSNTVPAKSCQAQPT	κ-casein	53	T	N
KPVALINNQFLPYPYYAKPAAVR	κ-casein	23	R	K
SDKIAKYIPIQYVLSRYPSYGLNYYQQKPVALINNQFL	κ-casein	38	L	S
PEVIESPPEINTVQVTST	κ-casein	18	T	P
VRSPAQILQWQVLSNTVPAKSCQAQPTTMAR	κ-casein	31	R	V
SDKIAKYIPIQYVLSRYPSYGLNYYQQKPVALINNQFLPYPYYAKPAAVRSPAQILQW	κ-casein	58	W	S
HPHLSFMAIPPKKNQDKTEIPTINTIASGEPTSTPTTEAVESTVAT	κ-casein	46	T	H
PKKNQDKTEIPTINTIASGEPTSTPTTEAVESTVATLEDSPEVIESPPEI	κ-casein	50	I	P
AVESTVATLEDSPEVIESPPEINTVQVTSTAV	κ-casein	32	V	A
TVPAKSCQAQPTTMARHPHPHLSFMAIPPKKNQDKTEIPTINTIASGEPTSTPTTEAVE	κ-casein	59	E	T
TEAVESTVATLEDSPEVIESPPEINTVQ	κ-casein	28	Q	T
DKIAKYIPIQYVLS	κ-casein	14	S	D
AKSCQAQPTTMARHPHPHLSFMAIPPKKNQDK	κ-casein	32	K	A
ERFFSDKIAKYIPIQYVLSRYPSYGLNYYQQKPVALINNQFL	κ-casein	42	L	E
VALINNQFLPYPYYAKPAAVRSPAQILQWQVLSNTVPA	κ-casein	38	A	V
EPTSTPTTEAVESTVATLEDSPEVIESPPEINTVQVTST	κ-casein	39	T	E
VRSPAQILQWQVLSNTVPA	κ-casein	19	A	V
YIPIQYVLSRYPSYGLNYYQQKPVAL	κ-casein	26	L	Y
EIPTINTIASGEPTSTPTTEAVEST	κ-casein	25	T	E
YPYYAKPAAVRSPAQILQWQVLSNTVPAKSCQAQPTTMARHPHPHLSFMAIP	κ-casein	52	P	Y
TEIPTINTIASGEPTSTPTTEAVESTVATLEDSPEVI	κ-casein	37	I	T
KKNQDKTEIP	κ-casein	10	P	K
RCEKDERFFSDKIAKYIPIQYVLSRYPSYGLNYYQQKPVA	κ-casein	40	A	R
YYQQKPVALINNQFLPYPYYAKPAAVRSPAQILQWQVLSNTV	κ-casein	42	V	Y
VRSPAQILQWQVLSNTVPAKSCQAQPTTMARHPHPHLSFMAIPPKKNQDKTE	κ-casein	52	E	V
QWQVLSNTVPAKSCQAQPTTM	κ-casein	21	M	Q
INTIASGEPTSTPTTEAVESTVATLEDSPEVIESPPEINTVQVT	κ-casein	44	T	I
PIQYVLSRYPSYGLNYYQQK	κ-casein	20	K	P
AAVRSPAQILQWQVLSNTVPAKSCQAQPTTMARHPHPHLSF	κ-casein	41	F	A
PVALINNQFLPYPYYAKPAAVRSPAQILQWQVLSNTV	κ-casein	37	V	P
DKTEIPTINTIASGEP	κ-casein	16	P	D
YQQKPVALINNQFLPYPYYAKPAAVRSPAQILQWQ	κ-casein	35	Q	Y
RHPHPHLSFMAIPPKKNQDKTE	κ-casein	22	E	R
AQILQWQVLSNTVPAKSCQAQPTT	κ-casein	24	T	A
PTINTIASGEPTSTPTTEAVESTV	κ-casein	24	V	P
NTVPAKSCQAQPTTMARHPHPHLSFMAIPPKKNQDK	κ-casein	36	K	N
AQPTTMARHPHPHLSFMAIPPKKNQDKTEIPT	κ-casein	32	T	A
ASGEPTSTPTTEAVESTVATL	κ-casein	21	L	A
RCEKDERFFSDKIAKYIPIQYVLSRYPSYGLNYYQQKPVAL	κ-casein	41	L	R
TEIPTINTIASGE	κ-casein	13	E	T
LQWQVLSNTVPAK	κ-casein	13	K	L
PVALINNQFLPYPYYAKPAAVRSPAQILQWQVLSNTVPAKSCQAQPTTMA	κ-casein	50	A	P
ALINNQFLPYPYYAKPAAVRSPAQILQWQVLSNTVPAKS	κ-casein	39	S	A
QNQEQPIRCEKDERFFS	κ-casein	17	S	Q
YQQKPVALINNQFLPYPYYAKP	κ-casein	22	P	Y
ERFFSDKIAKYIPIQYVLSRYPSYGLNYY	κ-casein	29	Y	E
TTEAVESTVATLEDSPEVIESPPEINTVQ	κ-casein	29	Q	T
QDKTEIPTINTIASGEPTSTPTTEAVESTVATLEDSPEVIESPPEINTVQVTS	κ-casein	53	S	Q
QAQPTTMARHPHPH	κ-casein	14	H	Q
SFMAIPPKKNQDKTEIPTINTIASGEPTSTPTTEAVESTVATLEDSP	κ-casein	47	P	S
KNQDKTEIPTINTIASGEPTSTPTTEAVESTVATLEDSPEVIESPPEINT	κ-casein	50	T	K
ARHPHPHLSFMAIPPKKNQDKTEIPT	κ-casein	26	T	A
PVALINNQFLPYPYYAKPAAVRSPAQILQWQVLSNTVPAKSCQAQPTTMARHPHPHLS	κ-casein	58	S	P
VLSRYPSYGLNYYQQK	κ-casein	16	K	V
